# Supplementary material for: Probing GFP Chromophore Analogs as Anti-HIV Agents Targeting LTR-III G-Quadruplex
Source: MDPI journal article supplement (doi:10.3390/biom11101409), 2021-09-26
Supplement: s1 [file s1]

# Probing GFP Chromophore Analogs as anti-HIV agents targeting LTR-III G-Quadruplex

Dmitriy Y. Ryazantsev<sup>1,†</sup>, Mikhail Yu. Myshkin<sup>1,†</sup>, Vera A. Alferova<sup>1,2,†</sup>, Vladimir B. Tsvetkov<sup>3,4,†</sup>, Elena Y. Shustova<sup>5</sup>, Polina N. Kamzeeva<sup>1,6</sup>, Polina V. Kovalets<sup>1</sup>, Elvira R. Zaitseva<sup>1,6</sup>, Nadezhda S. Baleeva<sup>1,7</sup>, Timofei S. Zatsepin<sup>8</sup>, Zakhar O. Shenkarev<sup>1</sup>, Mikhail S. Baranov<sup>1,7</sup>, Liubov I. Kozlovskaya<sup>5,9\*</sup> and Andrey V. Aralov<sup>1,10\*</sup>

<sup>1</sup> Shemyakin-Ovchinnikov Institute of Bioorganic Chemistry, Russian Academy of Sciences, Moscow, 117997, Russia;

<sup>2</sup> Gause Institute of New Antibiotics, B. Pirogovskaya 11, Moscow, 119021, Russia

<sup>3</sup> World-Class Research Center “Digital biodesign and personalized healthcare”, Sechenov First Moscow State Medical University, 8/2 Trubetskaya Str., Moscow, 119146, Russia

<sup>4</sup> Research and Clinical Center of Physical-Chemical Medicine of Federal Medical Biological Agency, Moscow, 119435, Russia

<sup>5</sup> Chumakov Federal Scientific Center for Research and Development of Immune-and-Biological Products of Russian Academy of Sciences, Moscow, 108819, Russia

<sup>6</sup> D. Mendeleev University of Chemical Technology of Russia, 9 Miusskaya Sq., Moscow, 125047, Russia

<sup>7</sup> Pirogov Russian National Research Medical University, Ostrovitianov 1, 117997 Moscow, Russia

<sup>8</sup> Center for Life Sciences, Skolkovo Institute of Science and Technology, Moscow, 121205, Russia

<sup>9</sup> Sechenov First Moscow State Medical University, Moscow, 119991, Russia

<sup>10</sup> G4\_Interact, USERN, University of Pavia, Italy

\* Correspondence: [liubov\\_i\\_k@mail.ru](mailto:liubov_i_k@mail.ru) (LIK), [Baruh238@mail.ru](mailto:Baruh238@mail.ru) (AVA)

† these authors contributed equally to this work

## Contents

|                                                                                                                                                              |     |
|--------------------------------------------------------------------------------------------------------------------------------------------------------------|-----|
| Table S1. Primary screening of GFP chromophore analogs and their intermediates for the stabilizing properties of FAM/TAMRA-labeled LTR-III G-quadruplex..... | 3   |
| Table S2. Comparison of stabilization of model G4s and double stranded control sequences by primary screening lead compounds. ....                           | 75  |
| Table S3. Primary screening of newly synthesized GFP chromophore analogs for the stabilizing properties of FAM/TAMRA-labeled LTR-III G-quadruplex. ....      | 76  |
| Supplement S4. Structural motifs of the lead compounds in comparison with the other structurally related compounds.....                                      | 78  |
| Table S5. Comparison of stabilization of model G4s and double stranded control sequences by newly synthesized compounds.....                                 | 84  |
| Table S6. Titration experiments for N1193, N1196, N1197 at various DNA:ligand molar ratios.....                                                              | 85  |
| Supplement S7. Synthetic procedures for the synthesized GFP chromophore analogues.....                                                                       | 86  |
| Supplement S8. NMR titration data for the LTR-III/ZS260.1 complex.....                                                                                       | 124 |
| Supplement S9. HIV LTR-III G4 MD simulation parameters .....                                                                                                 | 125 |
| Supplement S10. The conformation of the LTR-III/ZS260.1 complex (additional simulation angles) .....                                                         | 126 |
| Supplement S11. HIV LTR-III G4/ZS260.1 complex MD simulation parameters .....                                                                                | 127 |
| Table S12. Antiviral activity of the tested compounds in MT4 cells against HIV-1 (st. NL4-3).....                                                            | 129 |

**Table S1. Primary screening of GFP chromophore analogs and their intermediates for the stabilizing properties of FAM/TAMRA-labeled LTR-III G-quadruplex.**

| No | code   | Structure                                                                            | LTR-III $\Delta T_m^a$ |
|----|--------|--------------------------------------------------------------------------------------|------------------------|
| 1  | AL 23  | 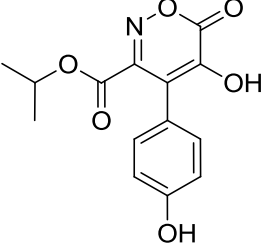   | 0                      |
| 2  | AL 25  |    | -0.1                   |
| 3  | AL 45  |   | 0.2                    |
| 4  | AL 58  |  | 0.1                    |
| 5  | AI 89  |   | -0.5                   |
| 6  | AI 116 |  | 0.8                    |

|    |          |                                                                                      |      |
|----|----------|--------------------------------------------------------------------------------------|------|
| 7  | AI 118   | 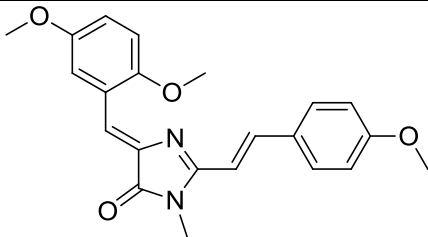   | -0.1 |
| 8  | AI 119   |    | 1.4  |
| 9  | AL 122   |    | -0.6 |
| 10 | AL 125   |   | 1.7  |
| 11 | AI 126   |  | 1.6  |
| 12 | AL 135.2 |  | -1.3 |
| 13 | AL 165   |   | -0.2 |

|    |            |                                                                                      |      |
|----|------------|--------------------------------------------------------------------------------------|------|
| 14 | AL 166.1   | 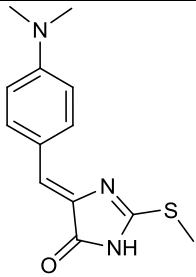    | 0.1  |
| 15 | AL 172     |     | -0.2 |
| 16 | Amm 75     |   | -0.3 |
| 17 | Boc-AV-GFP |  | 0.2  |
| 18 | ccA 1      |  | 0.6  |
| 19 | ccA 2      |  | 0.4  |

|    |        |                                                                                      |     |
|----|--------|--------------------------------------------------------------------------------------|-----|
| 20 | ccA 4  | 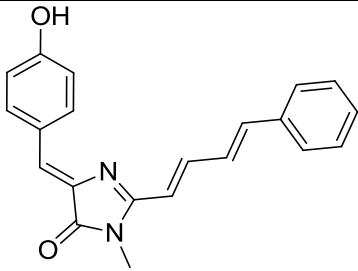   | 0.8 |
| 21 | ccA 7  |    | 0.8 |
| 22 | ccA 8  |    | 0.2 |
| 23 | ccA 9  |   | 0.3 |
| 24 | ccA 10 |  | 0.7 |
| 25 | ccA 11 |  | 0.1 |
| 26 | ccA 12 |  | 0.2 |

[Back to Contents](#)

|    |        |                                                                                      |      |
|----|--------|--------------------------------------------------------------------------------------|------|
| 27 | ccA 15 | 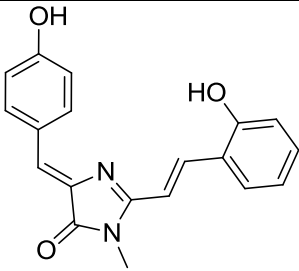   | 0.5  |
| 28 | ccA 16 |    | 0.8  |
| 29 | ccA 18 |    | 0.1  |
| 30 | ccA 19 |   | -0.1 |
| 31 | ccA 20 |  | 0.4  |
| 32 | ccA 22 |  | 0.3  |
| 33 | ccD 1  |  | 0.7  |

[Back to Contents](#)

|    |       |                                                                                      |      |
|----|-------|--------------------------------------------------------------------------------------|------|
| 34 | ccD 2 | 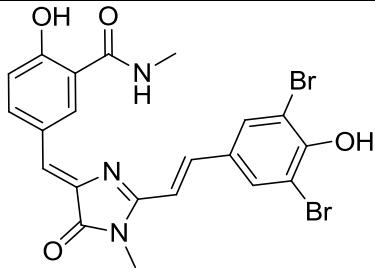   | 0.2  |
| 35 | ccE 2 |    | -0.1 |
| 36 | ccE 4 |   | 2.8  |
| 37 | ccE 7 |  | 0.3  |
| 38 | DOM   |  | -0.6 |
| 39 | GA 01 |   | -0.4 |



|    |       |                                                                                     |      |
|----|-------|-------------------------------------------------------------------------------------|------|
| 40 | GA 02 | 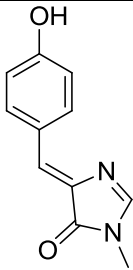   | -0.4 |
| 41 | GA 03 |    | 0.5  |
| 42 | GA 04 |    | -0.1 |
| 43 | GA 05 |  | -0.5 |
| 44 | GA 06 |  | -0.7 |
| 45 | GA 12 |  | 0.3  |

|    |       |                                                                                      |      |
|----|-------|--------------------------------------------------------------------------------------|------|
| 46 | GA 14 | 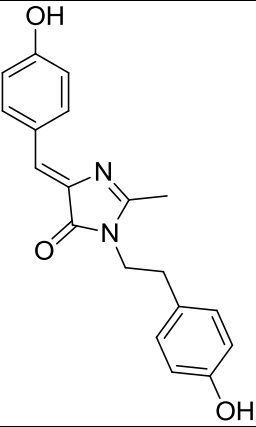   | 0.1  |
| 47 | GA 15 |     | -0.1 |
| 48 | GA 16 |    | 0.3  |
| 49 | GA 18 |  | -0.1 |
| 50 | GC 01 |   | 0.4  |

|    |          |                                                                                      |      |
|----|----------|--------------------------------------------------------------------------------------|------|
| 51 | GC 03    | 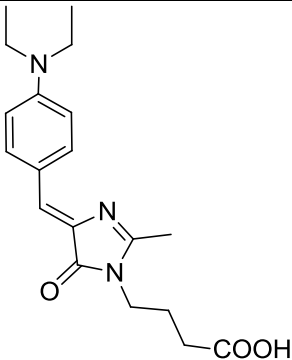   | 0.4  |
| 52 | GC 04    |     | 0    |
| 53 | GC 07    |   | -0.4 |
| 54 | GFP-2-Bn |  | -1.5 |
| 55 | GR 161   |  | -0.2 |
| 56 | GR 83    |  | -0.8 |

|    |         |                                                                                      |      |
|----|---------|--------------------------------------------------------------------------------------|------|
| 57 | HBR     | 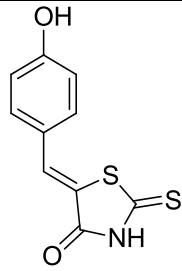    | -0.2 |
| 58 | HMBR    |     | -0.6 |
| 59 | JL 06.1 |    | 0.1  |
| 60 | JL 06.2 |    | 0.4  |
| 61 | JL 19   |   | 0.1  |
| 62 | M 165   |  | -0.5 |

|    |       |                                                                                      |      |
|----|-------|--------------------------------------------------------------------------------------|------|
| 63 | M 202 | 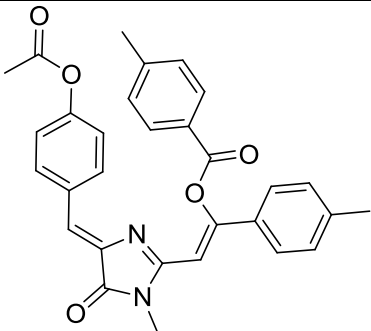   | -0.6 |
| 64 | M 228 |    | -0.8 |
| 65 | M 292 |   | -0.6 |
| 66 | M 295 |  | -0.5 |
| 67 | M 312 |   | -0.2 |

|    |         |                                                                                      |      |
|----|---------|--------------------------------------------------------------------------------------|------|
| 68 | M 316   | 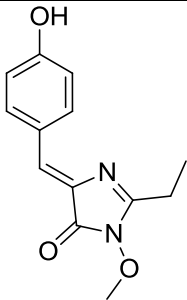    | -0.3 |
| 69 | M 440   |     | -0.1 |
| 70 | M 497a2 |    | -0.4 |
| 71 | M 552   |  | 0    |
| 72 | M 556   |   | -0.2 |
| 73 | M 577   |   | 0.1  |

|    |       |                                                                                      |      |
|----|-------|--------------------------------------------------------------------------------------|------|
| 74 | M 653 | 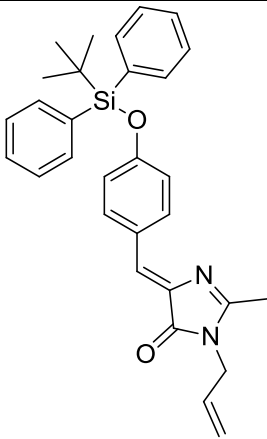   | -0.2 |
| 75 | M 678 |    | -0.4 |
| 76 | M 739 |   | -0.4 |
| 77 | M 747 |  | 0.6  |
| 78 | M 750 |  | -0.2 |

|    |       |                                                                                                                                                    |      |
|----|-------|----------------------------------------------------------------------------------------------------------------------------------------------------|------|
| 79 | M 800 | 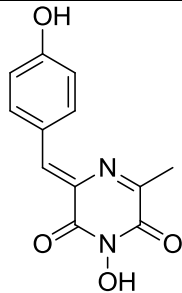 <chem>Oc1ccc(cc1)/C=C2/C(=O)N(O)C(=O)N=C2C</chem>                | -0.2 |
| 80 | M 802 |  <chem>COc1ccc(cc1)/C=C2/C(=O)N(C(C)C)C(=O)N=C2C</chem>          | -2.3 |
| 81 | M 803 |  <chem>Oc1ccc(cc1)/C=C2/C(=O)N(C(C)C)C(=O)N=C2C</chem>          | -0.1 |
| 82 | M 813 |  <chem>COc1ccc(cc1)/C=C2/C(=O)N(C(C)C)C(=O)N=C2C</chem>        | 2.9  |
| 83 | M 820 |  <chem>CCN(CC)c1ccc(cc1)/C=C2/C(=O)N(CCC(=O)O)C(=O)N=C2C</chem> | 0.1  |



|    |         |                                                                                      |      |
|----|---------|--------------------------------------------------------------------------------------|------|
| 84 | M 894   | 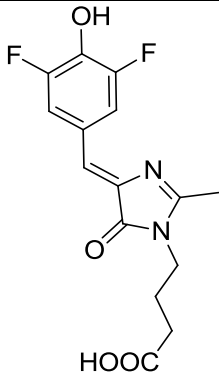    | -0.3 |
| 85 | M 895   |    | 0.8  |
| 86 | M 903.2 |   | 2.8  |
| 87 | M 920   |   | -0.4 |
| 88 | M 939   |  | -1.1 |
| 89 | M 958A  |  | -0.7 |

|    |         |                                                                                      |      |
|----|---------|--------------------------------------------------------------------------------------|------|
| 90 | M 995a  | 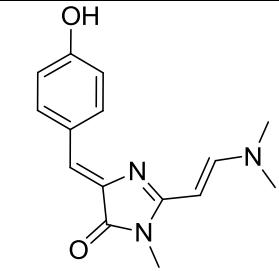   | 0.1  |
| 91 | M 996a  |    | 0.1  |
| 92 | M 1009A |   | 0.5  |
| 93 | M 1009B |  | 0.5  |
| 94 | M 1045  |   | 0.1  |
| 95 | M 1122  |  | -0.6 |

|     |        |                                                                                      |      |
|-----|--------|--------------------------------------------------------------------------------------|------|
| 96  | M 1136 | 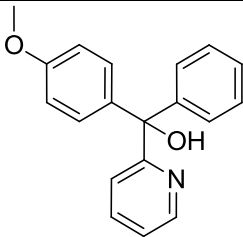   | -0.7 |
| 97  | M 1152 |    | 0.6  |
| 98  | M 1157 |     | 0    |
| 99  | M 1165 |    | 0.9  |
| 100 | M 1255 |   | -0.6 |
| 101 | M 1257 |   | -0.9 |
| 102 | M 1300 |  | 0.2  |

|     |          |                                                                                      |      |
|-----|----------|--------------------------------------------------------------------------------------|------|
| 103 | M 1343   | 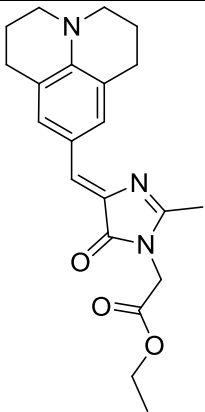    | 0    |
| 104 | M 1352   |    | -0.5 |
| 105 | M 1359   |   | 0.1  |
| 106 | M 1362.2 |  | -0.6 |
| 107 | M 1373.2 |   | -0.5 |

|     |          |                                                                                      |      |
|-----|----------|--------------------------------------------------------------------------------------|------|
| 108 | M 1378   | 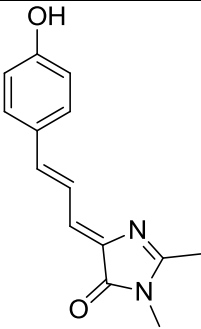    | -0.7 |
| 109 | M 1379.2 |     | -0.2 |
| 110 | M 1505   |   | -0.3 |
| 111 | M 1550   |  | -0.1 |

|     |          |                                                                                     |      |
|-----|----------|-------------------------------------------------------------------------------------|------|
| 112 | M 1557   | 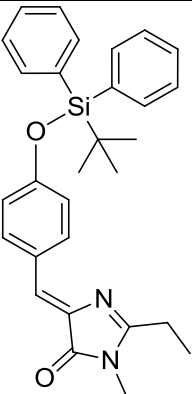   | -0.1 |
| 113 | M 1583.2 |    | -0.5 |
| 114 | M 1583.3 |    | 0.1  |
| 115 | M 1583.4 |   | 0.2  |
| 116 | M 1583.5 |  | 0.1  |
| 117 | M 1583.6 |  | 0    |
| 118 | M 1583.7 |  | -1.4 |

|     |        |                                                                                     |      |
|-----|--------|-------------------------------------------------------------------------------------|------|
| 119 | M 1586 | 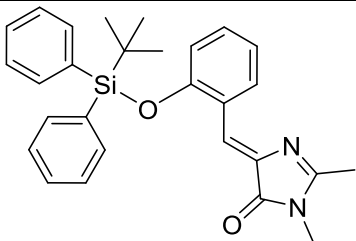  | -0.3 |
| 120 | M 1600 |   | -0.4 |
| 121 | M 1620 |  | 0.4  |
| 122 | M 1661 |  | 0.4  |
| 123 | M 1668 |  | 0.2  |

|     |          |                                                                                      |      |
|-----|----------|--------------------------------------------------------------------------------------|------|
| 124 | M 1706   | 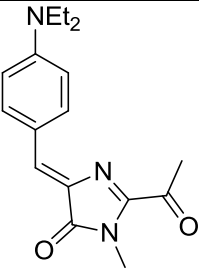    | -0.4 |
| 125 | M 1814   |     | -0.3 |
| 126 | M 1831.1 |    | -0.2 |
| 127 | M 1862   |  | -1.1 |
| 128 | M 1878.1 |  | -1.5 |
| 129 | M 1933   |   | -0.3 |



|     |          |                                                                                      |      |
|-----|----------|--------------------------------------------------------------------------------------|------|
| 130 | M 1944b  | 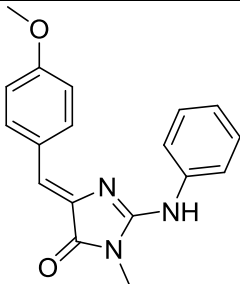   | -0.3 |
| 131 | M 1945.1 |     | -0.6 |
| 132 | M 1971a  |    | -0.3 |
| 133 | M 1971c  |   | 0.6  |
| 134 | M 1974   |   | 0    |
| 135 | M 1975   |  | -0.6 |
| 136 | M 1977   |  | 0    |

|     |         |                                                                                     |      |
|-----|---------|-------------------------------------------------------------------------------------|------|
| 137 | M 1978  | 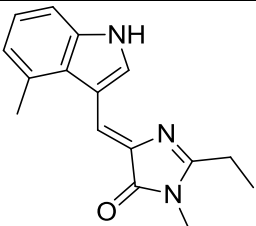  | -0.1 |
| 138 | M 1979  |   | -0.1 |
| 139 | M 1981  |   | 1.7  |
| 140 | M 1998  |   | -0.4 |
| 141 | M 2022a |  | -0.2 |
| 142 | M 2022b |  | 0    |

|     |         |                                                                                     |      |
|-----|---------|-------------------------------------------------------------------------------------|------|
| 143 | M 2022d | 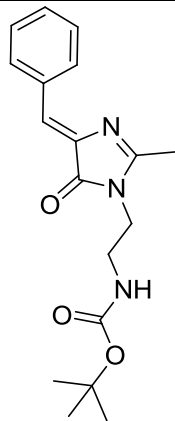   | -0.3 |
| 144 | M 2022e |   | 0    |
| 145 | M 2022f |  | -0.5 |
| 146 | M 2026c |  | 0.2  |

|     |         |                                                                                      |      |
|-----|---------|--------------------------------------------------------------------------------------|------|
| 147 | M 2026f | 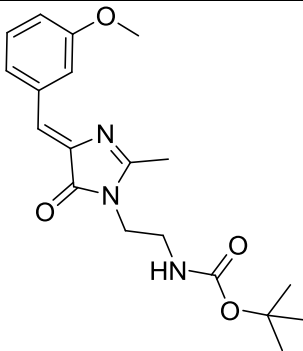   | -0.4 |
| 148 | M 2059  |    | -0.7 |
| 149 | M 2060  |   | -0.2 |
| 150 | M 2069  |  | -0.4 |
| 151 | M 2075  |  | 0.3  |
| 152 | M 2081  |  | 0.1  |

|     |          |                                                                                      |      |
|-----|----------|--------------------------------------------------------------------------------------|------|
| 153 | M 906    | 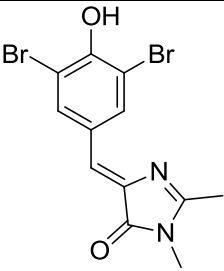   | -2.7 |
| 154 | M 2237   |    | -0.3 |
| 155 | M 2250.2 |    | -0.1 |
| 156 | M 2273.1 |  | 0.2  |
| 157 | M 2286.1 |   | -0.3 |
| 158 | M 2296   |   | -0.4 |

|     |          |                                                                                      |      |
|-----|----------|--------------------------------------------------------------------------------------|------|
| 159 | M 2301   | 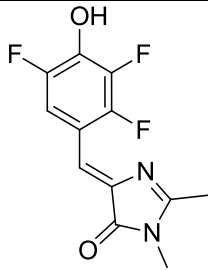    | 0.2  |
| 160 | M 2360   |    | -0.3 |
| 161 | M 2368b2 |    | -0.9 |
| 162 | M 2368c  |   | 0    |
| 163 | M 2368d  |  | 0.1  |
| 164 | M 2370   |   | 0    |

|     |          |                                                                                      |      |
|-----|----------|--------------------------------------------------------------------------------------|------|
| 165 | M 2371c  | 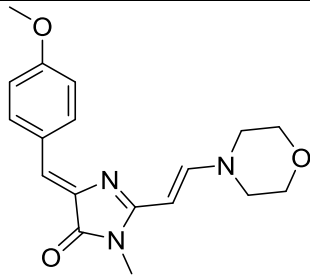   | -0.1 |
| 166 | M 2372a  |    | 0.1  |
| 167 | M 2372B  |     | -0.2 |
| 168 | M 2375   |   | -0.2 |
| 169 | M 2379   |   | 0.1  |
| 170 | M 2385a  |  | -0.1 |
| 171 | M 2385b1 |  | -0.1 |

|     |          |                                                                                      |      |
|-----|----------|--------------------------------------------------------------------------------------|------|
| 172 | M 2482   | 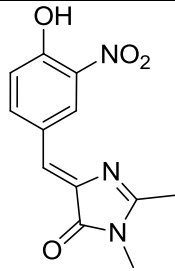    | -1.2 |
| 173 | M 2486   |     | 0    |
| 174 | M 2489.2 |     | -0.5 |
| 175 | M 2491   |    | -0.2 |
| 176 | M 2497   |   | 0    |
| 177 | M 2499a  |  | 0.1  |
| 178 | M 2499b  |  | 0.3  |



|     |         |                                                                                      |     |
|-----|---------|--------------------------------------------------------------------------------------|-----|
| 179 | M 2738c | 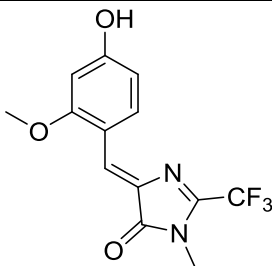   | 0.4 |
| 180 | M 2738d |    | 1.4 |
| 181 | M 2761a |   | 0.5 |
| 182 | M 2761b |  | 0.8 |
| 183 | M 2766  |  | 1.1 |
| 184 | M 2767  |  | 1.4 |

|     |         |                                                                                      |      |
|-----|---------|--------------------------------------------------------------------------------------|------|
| 185 | MID 145 | 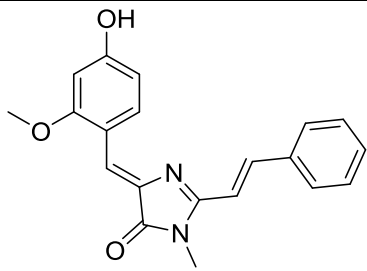   | 0.9  |
| 186 | MID 147 |    | 0.4  |
| 187 | MID 151 |    | 0.2  |
| 188 | MID 153 |   | 2    |
| 189 | MID 161 |  | -2.6 |
| 190 | MID 213 |  | 0.9  |
| 191 | N 49    |  | -0.1 |

|     |       |                                                                                      |      |
|-----|-------|--------------------------------------------------------------------------------------|------|
| 192 | N 62  | 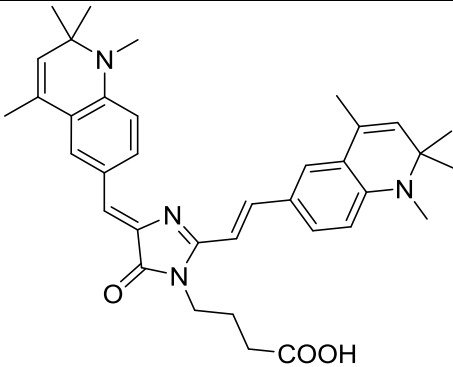   | 0.6  |
| 193 | N 141 |    | 0.2  |
| 194 | N 152 |   | 0.3  |
| 195 | N 154 |  | -0.1 |
| 196 | N 162 |  | 0.2  |

|     |         |                                                                                      |      |
|-----|---------|--------------------------------------------------------------------------------------|------|
| 197 | N 182   | 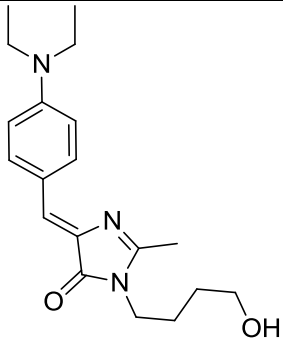   | -0.1 |
| 198 | N 189   |    | 0.2  |
| 199 | N 357   |   | 0.1  |
| 200 | N 367   |   | 0.3  |
| 201 | N 537   |  | -0.3 |
| 202 | N 539.1 |  | 0    |

|     |          |                                                                                     |      |
|-----|----------|-------------------------------------------------------------------------------------|------|
| 203 | N 555.3  | 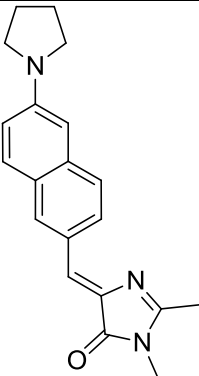   | 0.7  |
| 204 | N 576.2  |   | 0    |
| 205 | N 576.3  |   | 0    |
| 206 | N 582.1  |   | 0    |
| 207 | N 599.2  |   | -0.7 |
| 208 | N 601.23 |  | -0.7 |
| 209 | N 624    |  | -0.5 |

|     |         |                                                                                      |      |
|-----|---------|--------------------------------------------------------------------------------------|------|
| 210 | N 641   | 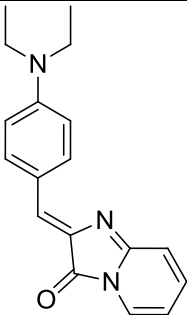    | -0.5 |
| 211 | N 652.3 |     | 0.3  |
| 212 | N 665   |    | -0.3 |
| 213 | N 683.1 |   | 5    |
| 214 | N 702.1 |  | 0    |
| 215 | N 704   |   | -0.2 |

|     |          |                                                                                      |      |
|-----|----------|--------------------------------------------------------------------------------------|------|
| 216 | N 708.2  | 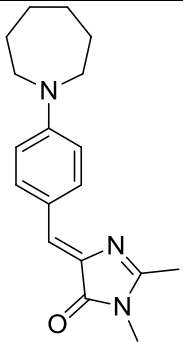    | 0.2  |
| 217 | N 710.12 |     | 0.1  |
| 218 | N 768    |   | 0.9  |
| 219 | N 781    |  | 0    |
| 220 | N 792    |  | 0.2  |
| 221 | N 813    |  | 0.6  |
| 222 | N 815    |   | -0.1 |

|     |         |                                                                                      |      |
|-----|---------|--------------------------------------------------------------------------------------|------|
| 223 | N 817   | 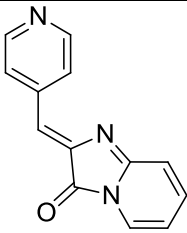    | 0    |
| 224 | N 817.2 |    | -0.1 |
| 225 | N 830A  |     | -0.1 |
| 226 | N 830b  |    | -0.2 |
| 227 | N 831   |  | 0    |
| 228 | N 832   |  | -0.5 |
| 229 | N 833   |  | -0.6 |



|     |         |                                                                                      |      |
|-----|---------|--------------------------------------------------------------------------------------|------|
| 230 | N 840   | 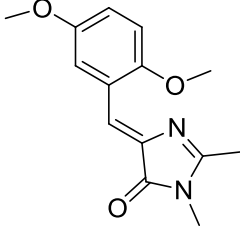   | -2.5 |
| 231 | N 844.1 |    | -0.1 |
| 232 | N 848.1 |    | -1.8 |
| 233 | N 848.2 |   | 2.6  |
| 234 | N 848.3 |  | 2.9  |
| 235 | N 851A  |  | 1.4  |
| 236 | N 851B  |  | 1.2  |

|     |        |                                                                                      |      |
|-----|--------|--------------------------------------------------------------------------------------|------|
| 237 | N 853  | 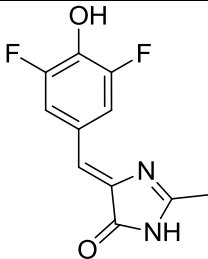    | -0.9 |
| 238 | N 855  |    | 0.4  |
| 239 | N 860C |    | -0.2 |
| 240 | N 861  |   | 0    |
| 241 | N 863  |  | 0    |
| 242 | N 864  |  | -2.3 |
| 243 | N 865  |  | 0.8  |

[Back to Contents](#)

|     |        |                                                                                      |      |
|-----|--------|--------------------------------------------------------------------------------------|------|
| 244 | N 866  | 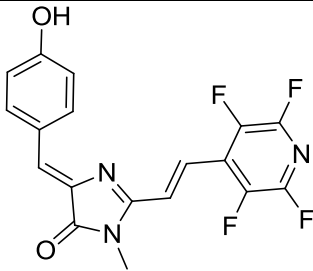   | -0.2 |
| 245 | N 871B |    | 0.4  |
| 246 | N 873  |    | 0.4  |
| 247 | N 886  |   | -0.2 |
| 248 | N 892  |   | -1   |
| 249 | N 893  |  | -0.4 |

|     |       |                                                                                      |      |
|-----|-------|--------------------------------------------------------------------------------------|------|
| 250 | N 898 | 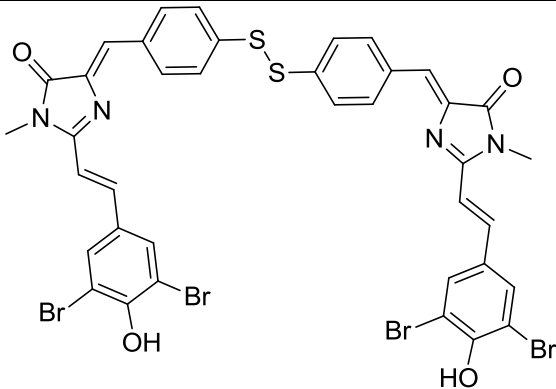   | 0.1  |
| 251 | N 901 |    | 0.4  |
| 252 | N 904 |   | -1.2 |
| 253 | N 906 |  | 0.1  |
| 254 | N 908 |  | 2.4  |

|     |        |                                                                                      |      |
|-----|--------|--------------------------------------------------------------------------------------|------|
| 255 | N 914  | 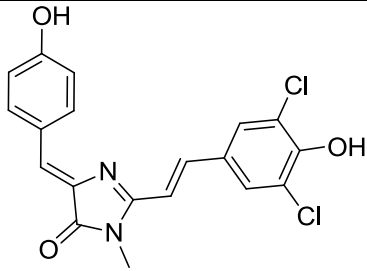   | -0.8 |
| 256 | N 960a |    | 5.3  |
| 257 | N 960b |    | 0.7  |
| 258 | N 967  |   | 0.8  |
| 259 | N 971  |  | 0.1  |
| 260 | N 973  |  | 2.3  |
| 261 | N 976  |  | 0.5  |

|     |          |                                                                                     |      |
|-----|----------|-------------------------------------------------------------------------------------|------|
| 262 | N 979    | 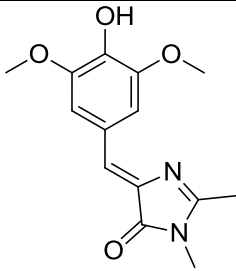  | -0.2 |
| 263 | N 980    |   | 1    |
| 264 | N 1019   |    | -0.3 |
| 265 | N 1020   |   | -0.2 |
| 266 | N 1021   |  | 0.3  |
| 267 | N 1027.1 |  | -0.1 |
| 268 | N 1036   |  | 0.5  |

|     |          |                                                                                      |     |
|-----|----------|--------------------------------------------------------------------------------------|-----|
| 269 | N 1039   | 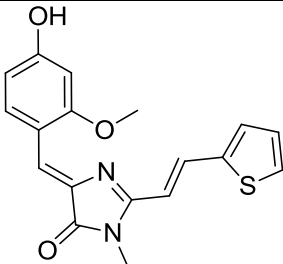   | 1.1 |
| 270 | N 1042   |    | 1.4 |
| 271 | N 1048   |    | 1.5 |
| 272 | N 1049   |   | 1.8 |
| 273 | N 1052   |  | 4.6 |
| 274 | N 1056   |  | 0   |
| 275 | N 1068.2 |  | 7.1 |

|     |        |                                                                                      |     |
|-----|--------|--------------------------------------------------------------------------------------|-----|
| 276 | N 1069 | 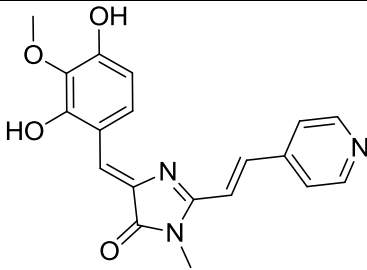   | 2.7 |
| 277 | N 111  |    | 1   |
| 278 | N 1118 |   | 3   |
| 279 | N 1122 |  | 2.3 |
| 280 | N 1123 |  | 0.3 |
| 281 | N 1124 |  | 1.3 |



|     |         |                                                                                      |     |
|-----|---------|--------------------------------------------------------------------------------------|-----|
| 282 | N 1135  | 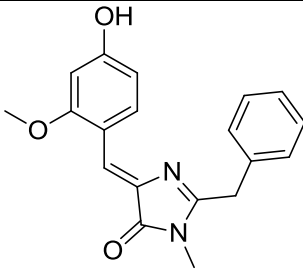   | 0   |
| 283 | N 1139  |    | 0.6 |
| 284 | N 1142  |    | 0.1 |
| 285 | SA 33   |    | 0.2 |
| 286 | SA 49.1 |  | 0   |
| 287 | SA 99   |  | 0.1 |

|     |        |                                                                                      |      |
|-----|--------|--------------------------------------------------------------------------------------|------|
| 288 | SA 102 | 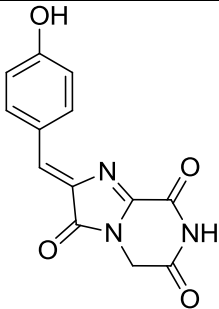    | 0.2  |
| 289 | SA 108 |     | -0.1 |
| 290 | SA 111 |   | -0.1 |
| 291 | SA 113 |   | 0.1  |
| 292 | SA 117 |  | -0.2 |
| 293 | SA 120 |  | -2.1 |

|     |          |                                                                                      |      |
|-----|----------|--------------------------------------------------------------------------------------|------|
| 294 | SA 128   | 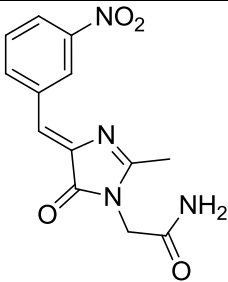   | 0.1  |
| 295 | SA 130   |     | 0.4  |
| 296 | SA 148   |   | -1.3 |
| 297 | SA 152   |  | -0.3 |
| 298 | SA 158   |  | 0.2  |
| 299 | SA 160.1 |   | 0.1  |

|     |         |                                                                                      |      |
|-----|---------|--------------------------------------------------------------------------------------|------|
| 300 | SA 168  | 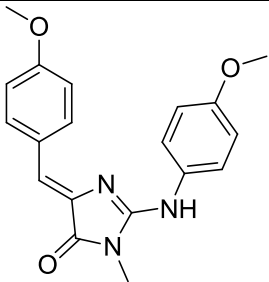   | -0.4 |
| 301 | SA 179  |    | 0.7  |
| 302 | SA 198  |    | -0.5 |
| 303 | SA 300A |  | 0.1  |
| 304 | SA 300B |  | -0.9 |
| 305 | SA 300D |  | -1.2 |
| 306 | SA 305A |  | -0.7 |

|     |         |                                                                                      |      |
|-----|---------|--------------------------------------------------------------------------------------|------|
| 307 | SA 305B | 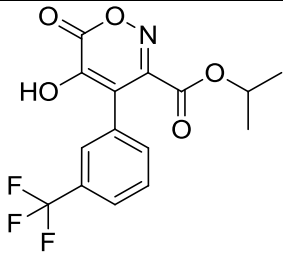   | -0.5 |
| 308 | SA 305C |    | -0.6 |
| 309 | SA 306B |    | -0.3 |
| 310 | SA 307A |   | -0.3 |
| 311 | SA 309  |  | -0.5 |
| 312 | SA 325A |  | -0.5 |
| 313 | SA 325E |  | -0.6 |

|     |          |                                                                                      |      |
|-----|----------|--------------------------------------------------------------------------------------|------|
| 314 | SA 330A  | 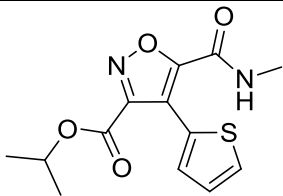   | -0.5 |
| 315 | SA 330E  |    | -0.7 |
| 316 | SA 331A  |    | -0.7 |
| 317 | SA 331D  |   | -0.7 |
| 318 | SA 331E  |  | -0.9 |
| 319 | SA 332.1 |  | -0.4 |
| 320 | SA 332.2 |  | -0.4 |

|     |          |                                                                                      |      |
|-----|----------|--------------------------------------------------------------------------------------|------|
| 321 | SA 332E1 | 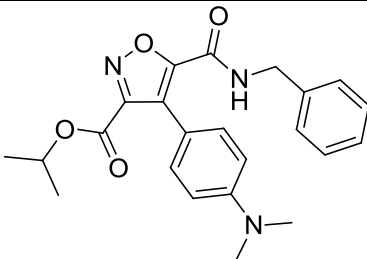   | -0.6 |
| 322 | SA 333   |    | -0.4 |
| 323 | SA 341A  |    | -0.7 |
| 324 | SA 341B  |   | -0.2 |
| 325 | SA 341C  |  | -0.2 |
| 326 | SA 342A  |  | -0.3 |

|     |         |                                                                                      |      |
|-----|---------|--------------------------------------------------------------------------------------|------|
| 327 | SA 342B | 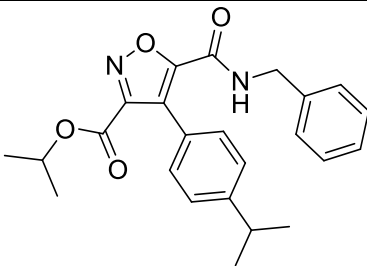   | -0.5 |
| 328 | SA 343A |    | -0.4 |
| 329 | SA 343B |    | -0.9 |
| 330 | SA 344A |   | -0.5 |
| 331 | SA 344B |  | -0.7 |



|     |         |                                                                                      |      |
|-----|---------|--------------------------------------------------------------------------------------|------|
| 332 | SA 345B | 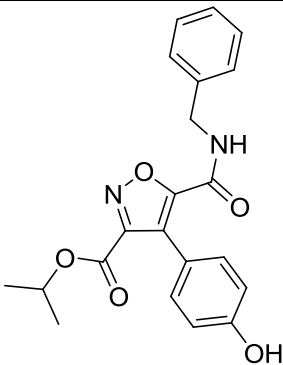   | -0.8 |
| 333 | SA 350C |    | -0.6 |
| 334 | SA 375  |   | -0.4 |
| 335 | SA 400  |   | 0    |
| 336 | SA 410  |  | -0.2 |

|     |          |                                                                                     |      |
|-----|----------|-------------------------------------------------------------------------------------|------|
| 337 | SA 412   | 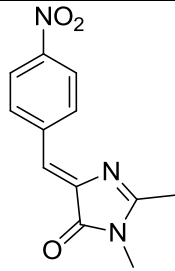   | 0    |
| 338 | SA 433   |    | -0.4 |
| 339 | SA 471   |    | -0.1 |
| 340 | SA 474.1 |  | 0    |
| 341 | SA 497   |  | -0.4 |
| 342 | SA 561A  |  | -0.3 |

|     |         |                                                                                      |      |
|-----|---------|--------------------------------------------------------------------------------------|------|
| 343 | SA 561B | 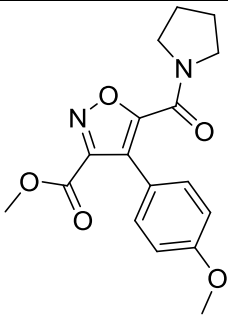   | -0.6 |
| 344 | SA 561C |    | -1   |
| 345 | SA 561D |   | -0.4 |
| 346 | SA 561E |  | -0.7 |
| 347 | SA 562B |  | -1   |
| 348 | SA 581  |   | 1    |

|     |           |                                                                                      |      |
|-----|-----------|--------------------------------------------------------------------------------------|------|
| 349 | SA 599.21 | 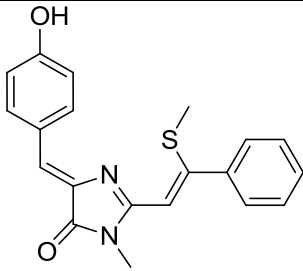   | -0.3 |
| 350 | SAI 32    |    | 0.4  |
| 351 | SAI 89    |    | 1.1  |
| 352 | SAI 112   |   | 0.3  |
| 353 | SAI 115   |   | -0.3 |
| 354 | SAI 117   |  | -0.2 |
| 355 | SAI 118   |   | 0    |

|     |           |                                                                                      |      |
|-----|-----------|--------------------------------------------------------------------------------------|------|
| 356 | SAI 120   | 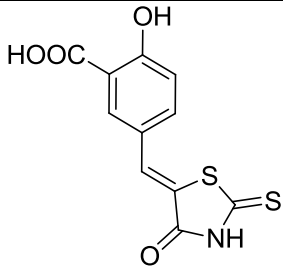   | 0.6  |
| 357 | SAI 121   |     | 0.9  |
| 358 | SAI 122   |     | 0.1  |
| 359 | SAI 125   |   | 0.6  |
| 360 | SAI 127   |  | -0.2 |
| 361 | SH 016.3B |  | 0.9  |
| 362 | SV 11     |  | 0    |

|     |          |                                                                                      |      |
|-----|----------|--------------------------------------------------------------------------------------|------|
| 363 | SV 13    | 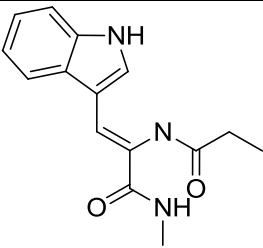   | -0.1 |
| 364 | SV 14    |    | 0    |
| 365 | SV 18    |    | 0.4  |
| 366 | SV 29    |   | -0.2 |
| 367 | SV 30    |  | -0.4 |
| 368 | SV 50.10 |   | -0.2 |
| 369 | SV 50.11 |   | -0.2 |

|     |          |                                                                                      |      |
|-----|----------|--------------------------------------------------------------------------------------|------|
| 370 | SV 50.9  | 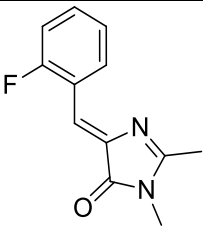    | -0.2 |
| 371 | SV 51.1  |     | -0.4 |
| 372 | SV 51.10 |     | -0.2 |
| 373 | SV 51.12 |   | 0.4  |
| 374 | SV 51.5  |  | -0.3 |
| 375 | SV 52.7  |   | -0.2 |
| 376 | SV 52.8  |   | 0.6  |

|     |       |                                                                                      |      |
|-----|-------|--------------------------------------------------------------------------------------|------|
| 377 | SV 6  | 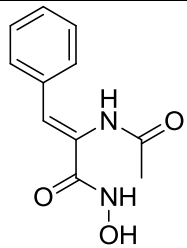    | 0    |
| 378 | SV 7  |     | 0    |
| 379 | VZ 1  |     | 0.4  |
| 380 | VZ 2  |   | -0.2 |
| 381 | X 001 |  | -0.5 |
| 382 | X 002 |  | -0.6 |
| 383 | X 4   |   | 1    |



|     |     |                                                                                     |      |
|-----|-----|-------------------------------------------------------------------------------------|------|
| 384 | X 5 | 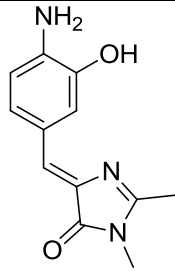   | 0.9  |
| 385 | X 6 |   | -0.1 |
| 386 | X 7 |   | 0    |
| 387 | X 8 |  | 0    |
| 388 | X 9 |  | -0.6 |

|     |      |                                                                                     |      |
|-----|------|-------------------------------------------------------------------------------------|------|
| 389 | X 10 | 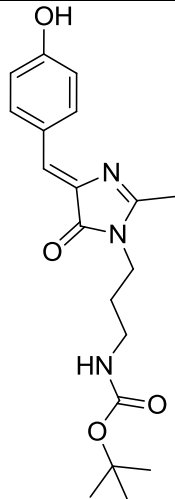   | -0.2 |
| 390 | X 11 |    | -0.2 |
| 391 | X 12 |   | 0.2  |
| 392 | X 13 |  | -0.8 |
| 393 | X 18 |  | 0.6  |

|     |      |                                                                                      |      |
|-----|------|--------------------------------------------------------------------------------------|------|
| 394 | X 20 | 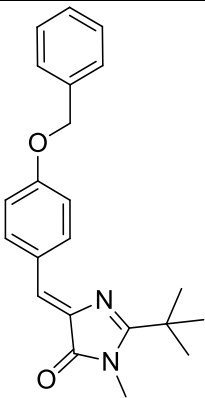    | -0.2 |
| 395 | X 21 |    | -0.1 |
| 396 | X 23 |   | 0.5  |
| 397 | X 24 |  | -0.5 |
| 398 | X 26 |  | -0.1 |
| 399 | X 27 |   | -0.1 |

|     |        |                                                                                     |      |
|-----|--------|-------------------------------------------------------------------------------------|------|
| 400 | X 28   | 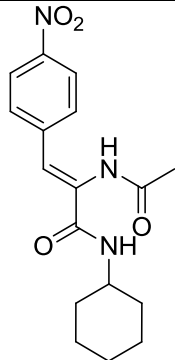   | -0.3 |
| 401 | X 29   |   | -0.6 |
| 402 | ZS 62  |  | 0    |
| 403 | ZS 69  |  | -0.4 |
| 404 | ZS 99  |  | -0.2 |
| 405 | ZS 109 |  | -0.7 |

|     |        |                                                                                     |      |
|-----|--------|-------------------------------------------------------------------------------------|------|
| 406 | ZS 128 | 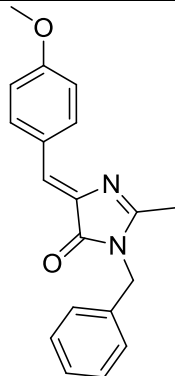   | -0.3 |
| 407 | ZS 129 |    | -0.2 |
| 408 | ZS142  |   | -1.4 |
| 409 | ZS 143 |  | -0.9 |
| 410 | ZS 146 |  | 0.2  |

|     |        |                                                                                      |      |
|-----|--------|--------------------------------------------------------------------------------------|------|
| 411 | ZS 167 | 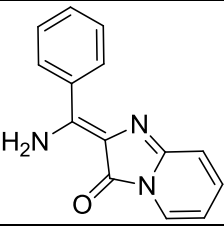   | -0.1 |
| 412 | ZS 174 |     | -0.3 |
| 413 | ZS 178 |     | -0.3 |
| 414 | ZS 182 |   | 0    |
| 415 | ZS 190 |   | -0.5 |
| 416 | ZS 199 |   | -0.4 |
| 417 | ZS 228 |  | 0.3  |

|     |          |                                                                                      |      |
|-----|----------|--------------------------------------------------------------------------------------|------|
| 418 | ZS 229   | 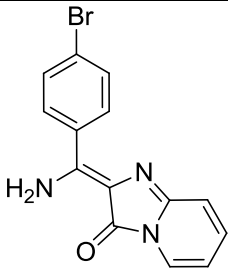   | 0.3  |
| 419 | ZS 233   |    | -0.1 |
| 420 | ZS 234   |   | 0    |
| 421 | ZS 235   |  | 0.1  |
| 422 | ZS 236   |  | -1.2 |
| 423 | ZS 256   |   | 0.2  |
| 424 | ZS 260.1 |  | 7.8  |

|     |         |                                                                                      |      |
|-----|---------|--------------------------------------------------------------------------------------|------|
| 425 | ZS 285b | 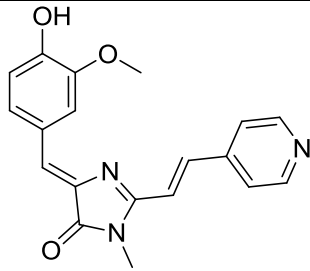   | 0.5  |
| 426 | ZS 286  |     | 0.3  |
| 427 | ZS 289a |    | -0.1 |
| 428 | ZS 291  |   | 0.4  |
| 429 | ZS 292  |  | -0.2 |
| 430 | ZS 295  |  | 0    |
| 431 | ZS 297  |  | 0.1  |

[Back to Contents](#)



|     |          |                                                                                      |      |
|-----|----------|--------------------------------------------------------------------------------------|------|
| 432 | ZS 298   | 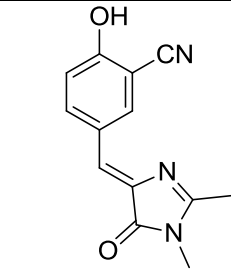    | -0.2 |
| 433 | ZS 300a  |    | -0.1 |
| 434 | ZS 309   |    | 0.3  |
| 435 | ZS 316   |   | 0.4  |
| 436 | ZS 319.2 |  | 2    |
| 437 | ZS 321   |  | 1.3  |
| 438 | ZS 325   |  | 1.6  |

|     |        |                                                                                    |     |
|-----|--------|------------------------------------------------------------------------------------|-----|
| 439 | ZS 331 | 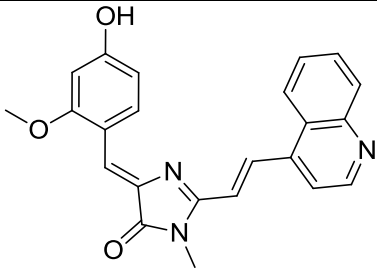 | 3.3 |
| 440 | ZS 362 |  | 0.2 |

<sup>a</sup> -  $\Delta T_m = T_m^{\text{LTR-III+ligand}} - T_m^{\text{LTR-III}}$

**Table S2. Comparison of stabilization of model G4s and double stranded control sequence by primary screening lead compounds.**

| $\Delta T_m^a$ | LTR III | Telo      | Pu39     | Duplex    |
|----------------|---------|-----------|----------|-----------|
| ZS 260.1       | 7.8±0.3 | 0.7±0.2   | 0.9±0.6  | 0.1±0.09  |
| N 1068.2       | 7.1±0.3 | 1.2±0.2   | 0±0.4    | 0.1±0.04  |
| N 960a         | 5.3±0.2 | 1±0.7     | 0.5±0.01 | -0.5±0.07 |
| N 683.1        | 5±0.1   | -0.1±0.04 | 1.4±0.6  | 0±0.04    |
| N 1052         | 4.6±0.2 | 3.9±0.1   | 2.1±0.2  | -0.1±0.04 |
| ZS 320         | 3.6±0.2 | 0.6±0.1   | 0±0.3    | -0.1±0.07 |
| ZS 331         | 3.3±0.2 | 2.5±0.3   | 0.8±0.2  | -0.2±0.1  |
| AL 267         | 3±0.2   | 0.5±0.2   | 0.2±0.2  | 0.2±0.04  |
| M 813          | 2.9±0.2 | -0.6±0.9  | -1.5±1   | 0±0.04    |
| MID 155        | 2.9±0.3 | 0.1±0.04  | 0±0.04   | -0.1±0.04 |
| N 848.3        | 2.9±0.1 | 1.1±0.2   | 0.7±0.3  | 0.1±0.09  |
| M 903.2        | 2.8±0.3 | 0.4±0.1   | -1±0.5   | 0.1±0.07  |
| N 848.2        | 2.6±0.2 | 2.1±0.01  | 0.1±0.4  | 0.4±0.04  |
| N 908          | 2.4±0.2 | 0.1±0.1   | -0.7±0.2 | 0±0.04    |

<sup>a</sup> -  $\Delta T_m = T_m^{\text{DNA target+ligand}} - T_m^{\text{DNA target}}$

**Table S3. Primary screening of newly synthesized GFP chromophore analogs for the stabilizing properties of FAM/TAMRA-labeled LTR-III G-quadruplex.**

| No  | code  | Structure                                                                            | LTR-III $\Delta T_m^a$ |
|-----|-------|--------------------------------------------------------------------------------------|------------------------|
| 441 | N1193 | 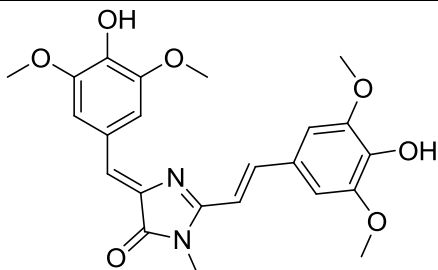   | 14                     |
| 442 | N1195 |    | 4.2                    |
| 443 | N1196 |   | 11.7                   |
| 444 | N1197 |  | 11.3                   |
| 445 | N1198 |  | 6.5                    |
| 446 | N1199 |  | 4.3                    |

|     |       |                                                                                     |      |
|-----|-------|-------------------------------------------------------------------------------------|------|
| 447 | AR556 | 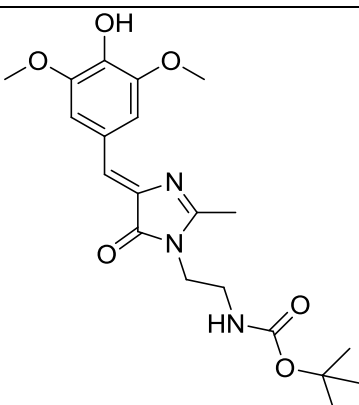  | -1.1 |
| 448 | AR558 |   | 0.7  |
| 449 | AR559 |  | 1.2  |

<sup>a</sup> -  $\Delta T_m = T_m^{\text{LTR-III+ligand}} - T_m^{\text{LTR-III}}$

**Supplement S4. Structural motifs of the lead compounds in comparison with the other structurally related compounds.**

Figure S4-1. The comparison of the substituents at 5-position of the GFP chromophore core,  $\Delta T_m$  values are shown under the chemical formulas

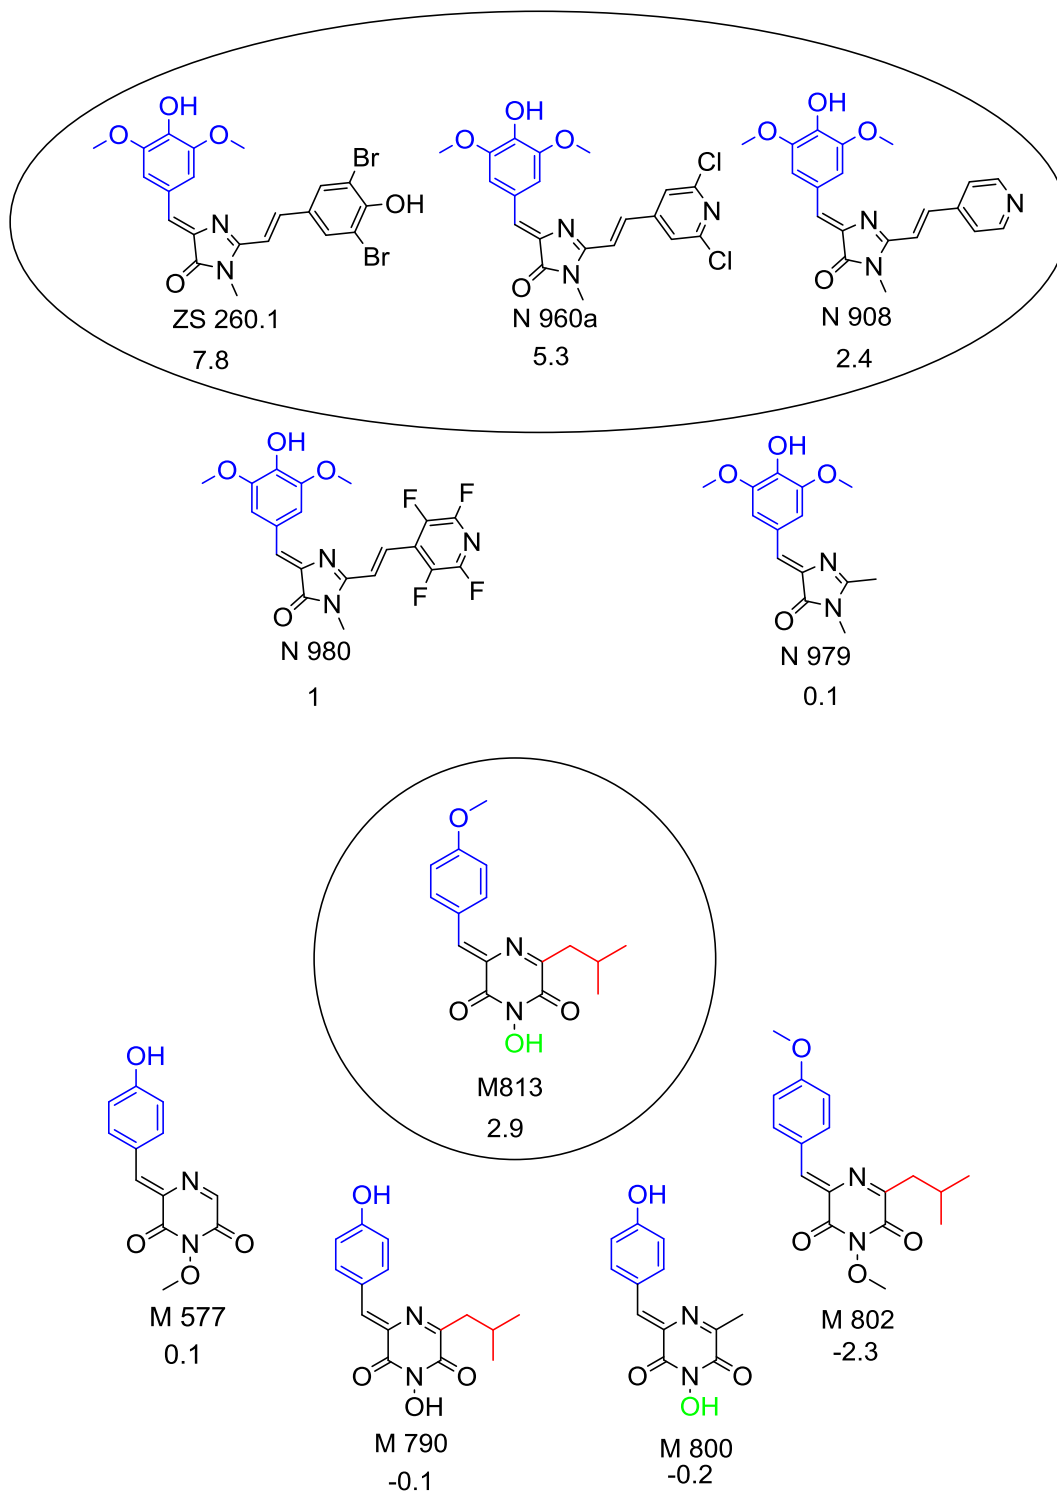

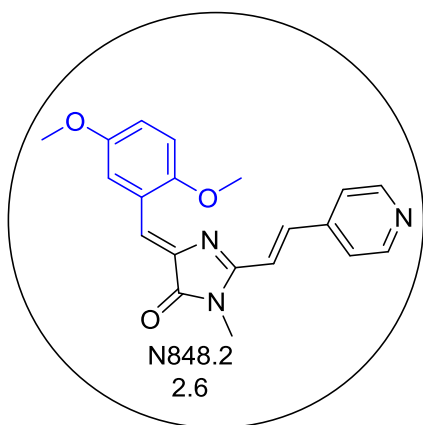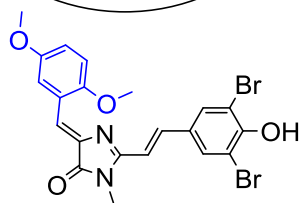

N 851A  
1.4

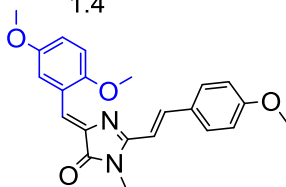

Al 118  
-0.1

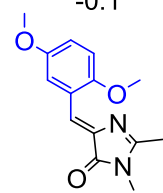

N 840  
-2.5

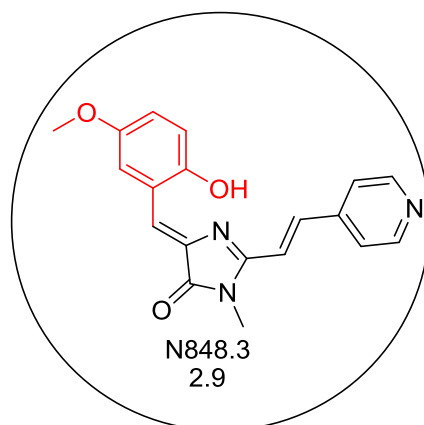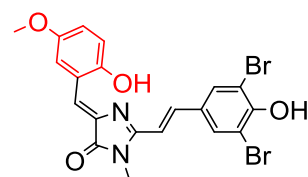

N 851B  
1.2

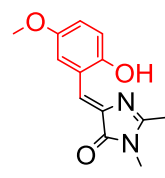

M 2360  
-0.3

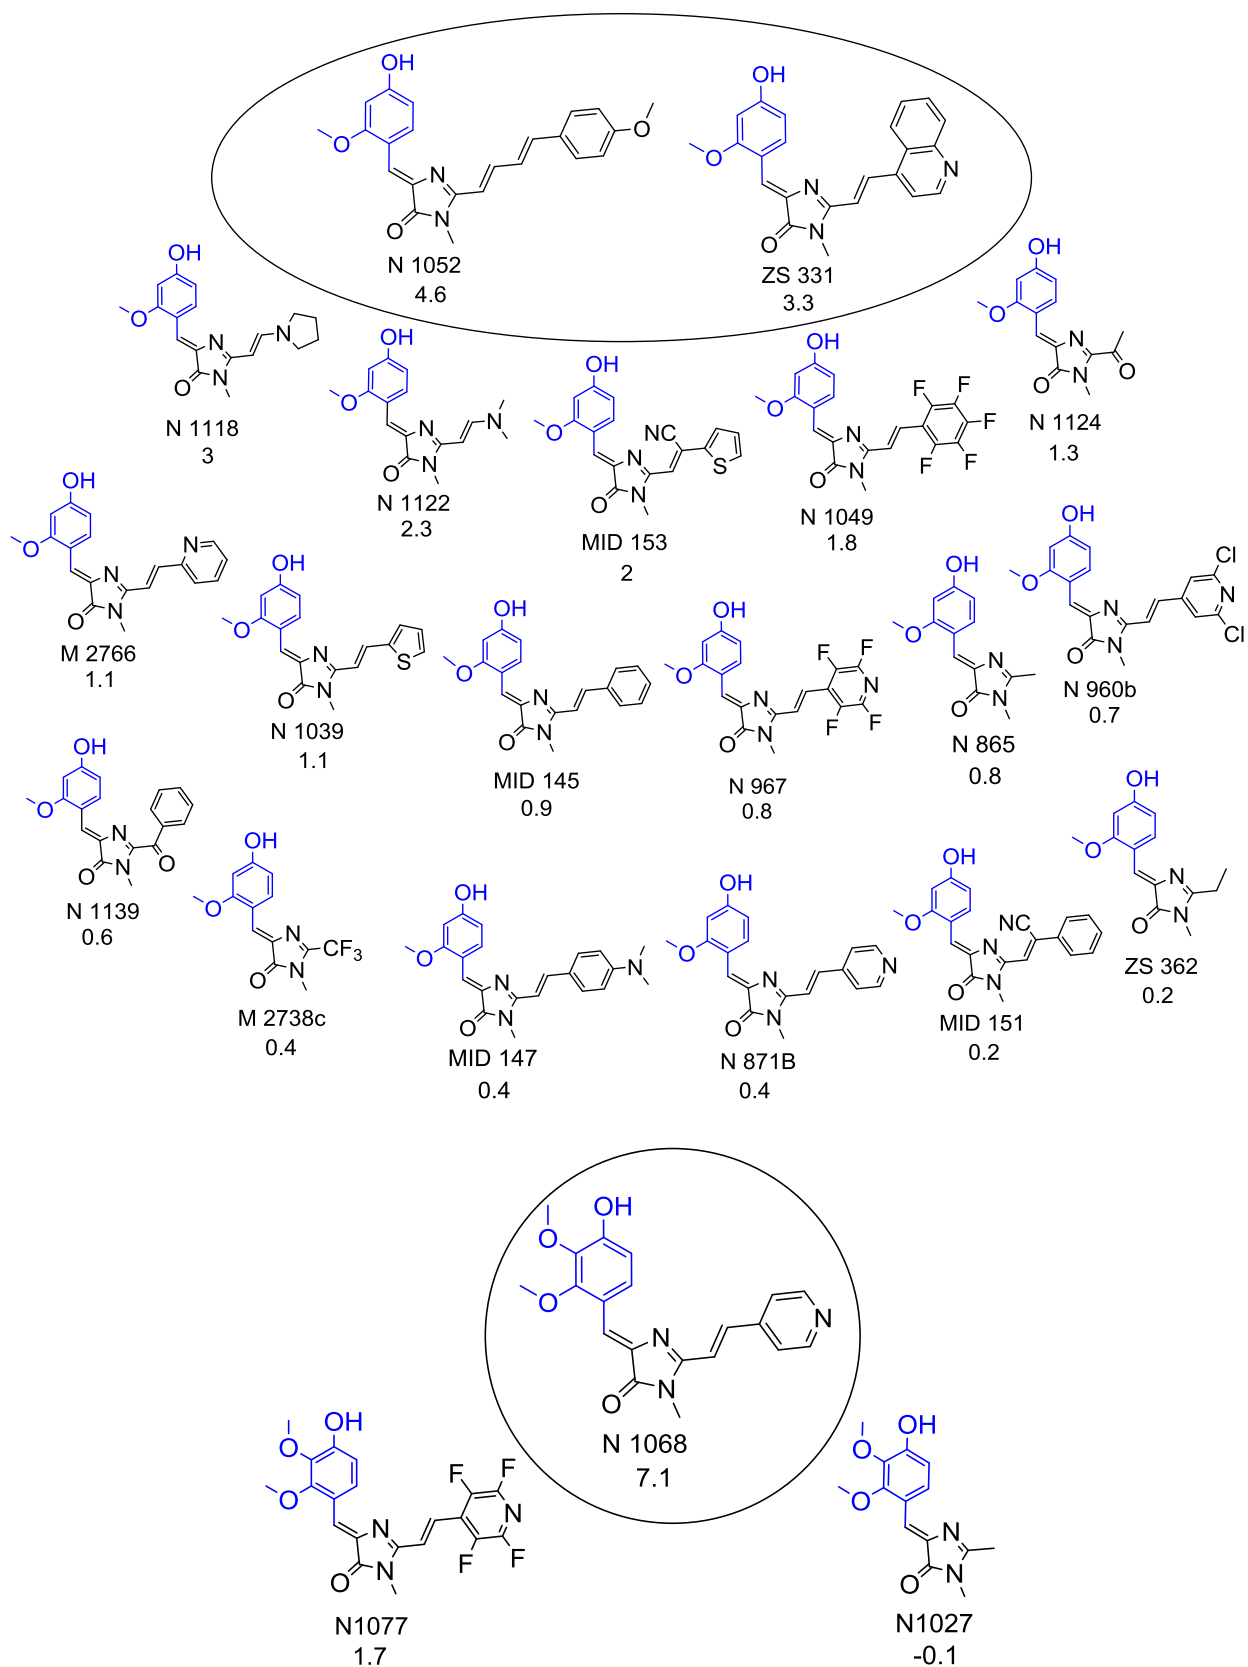



Figure S4-2 The comparison of the substituents at 2-position of the GFP chromophore core,  $\Delta T_m$  values are shown under the chemical formulas

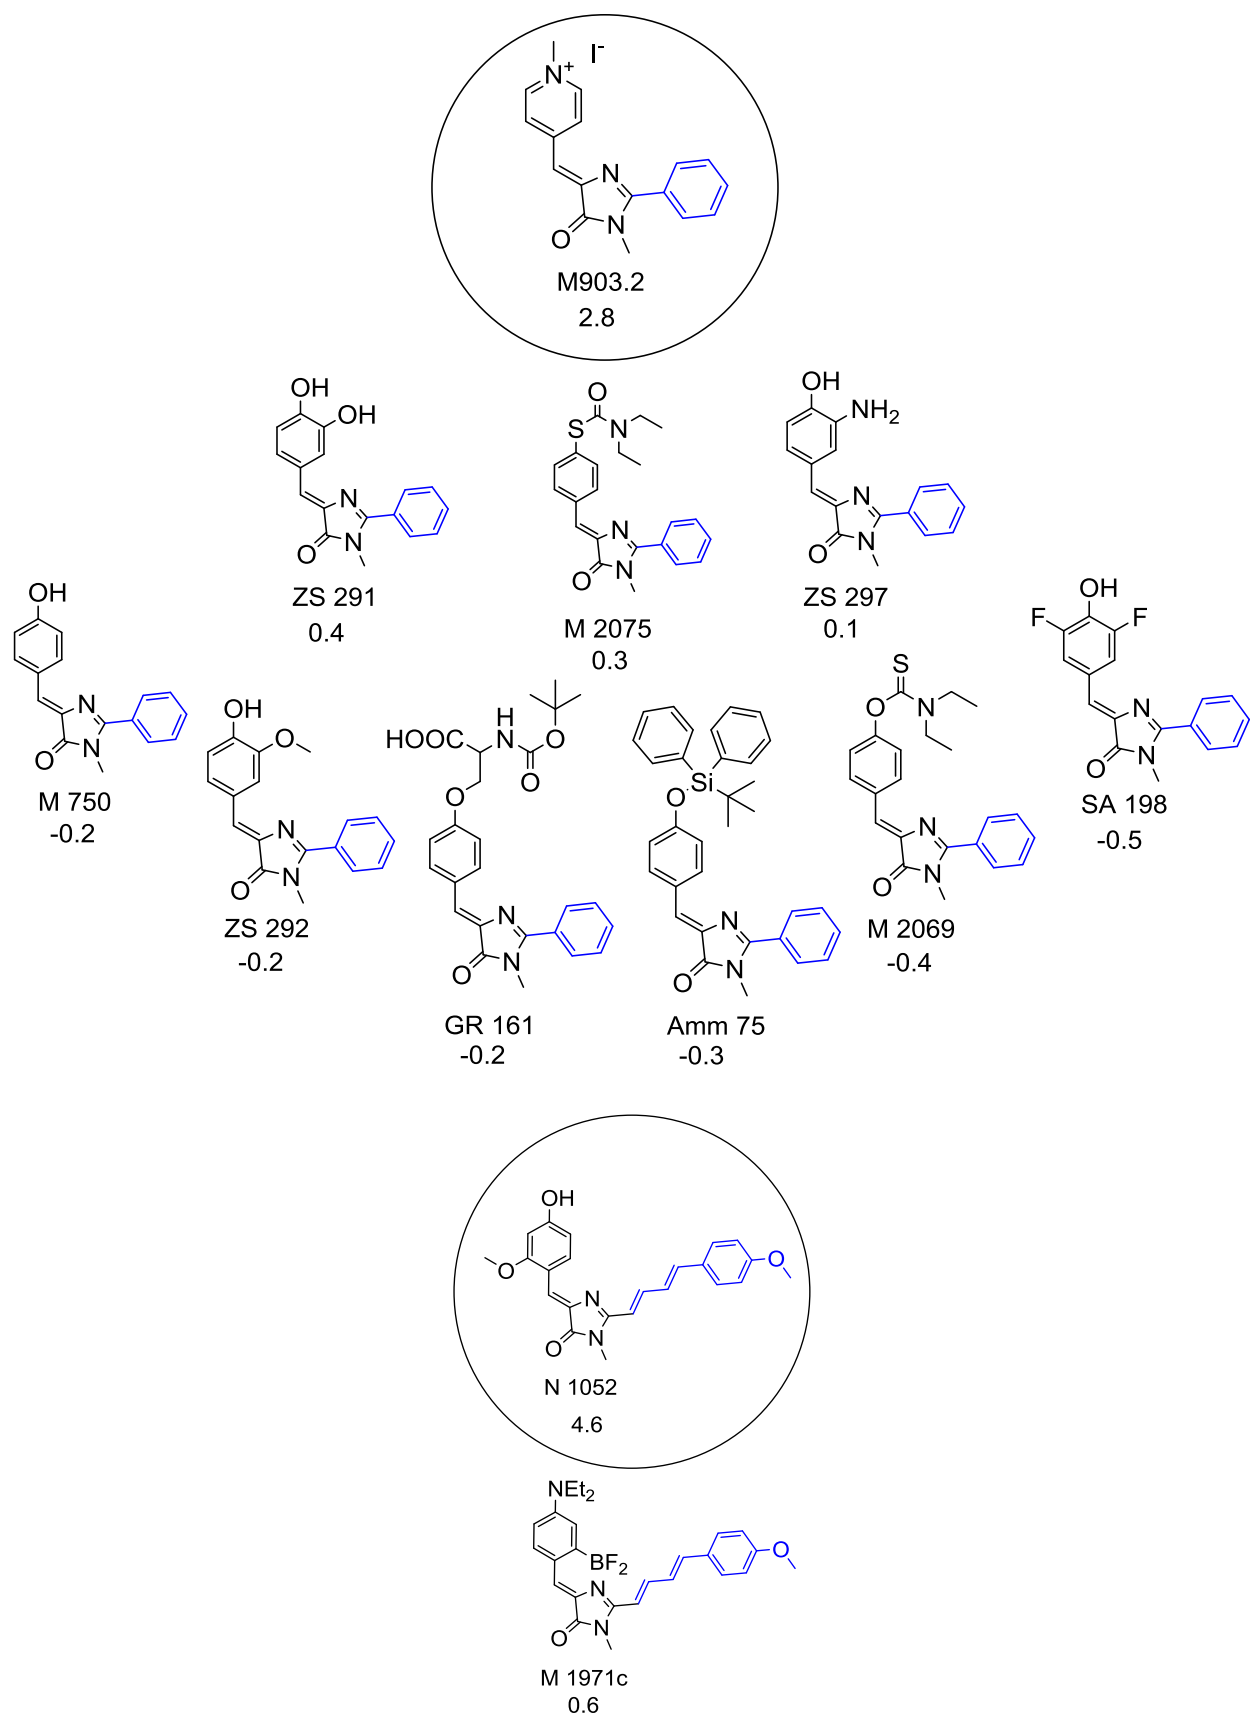

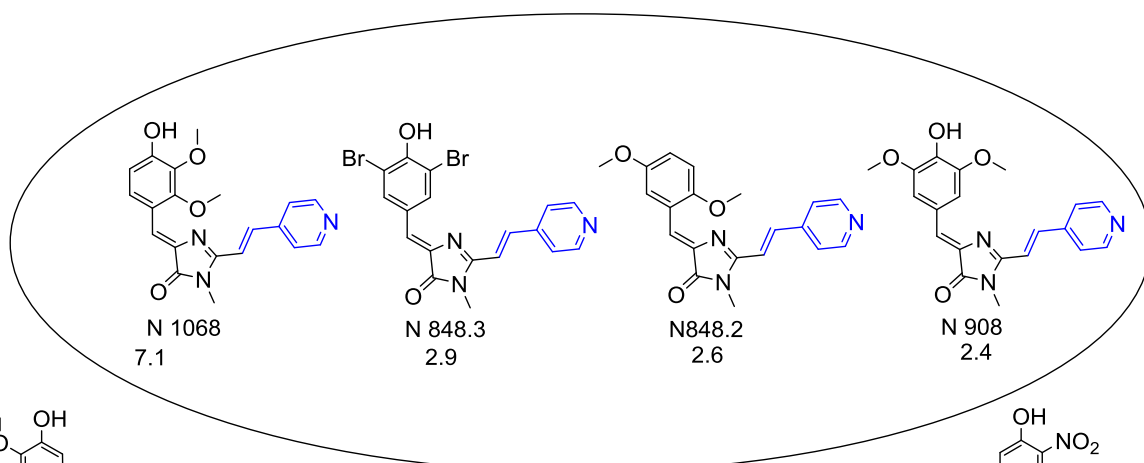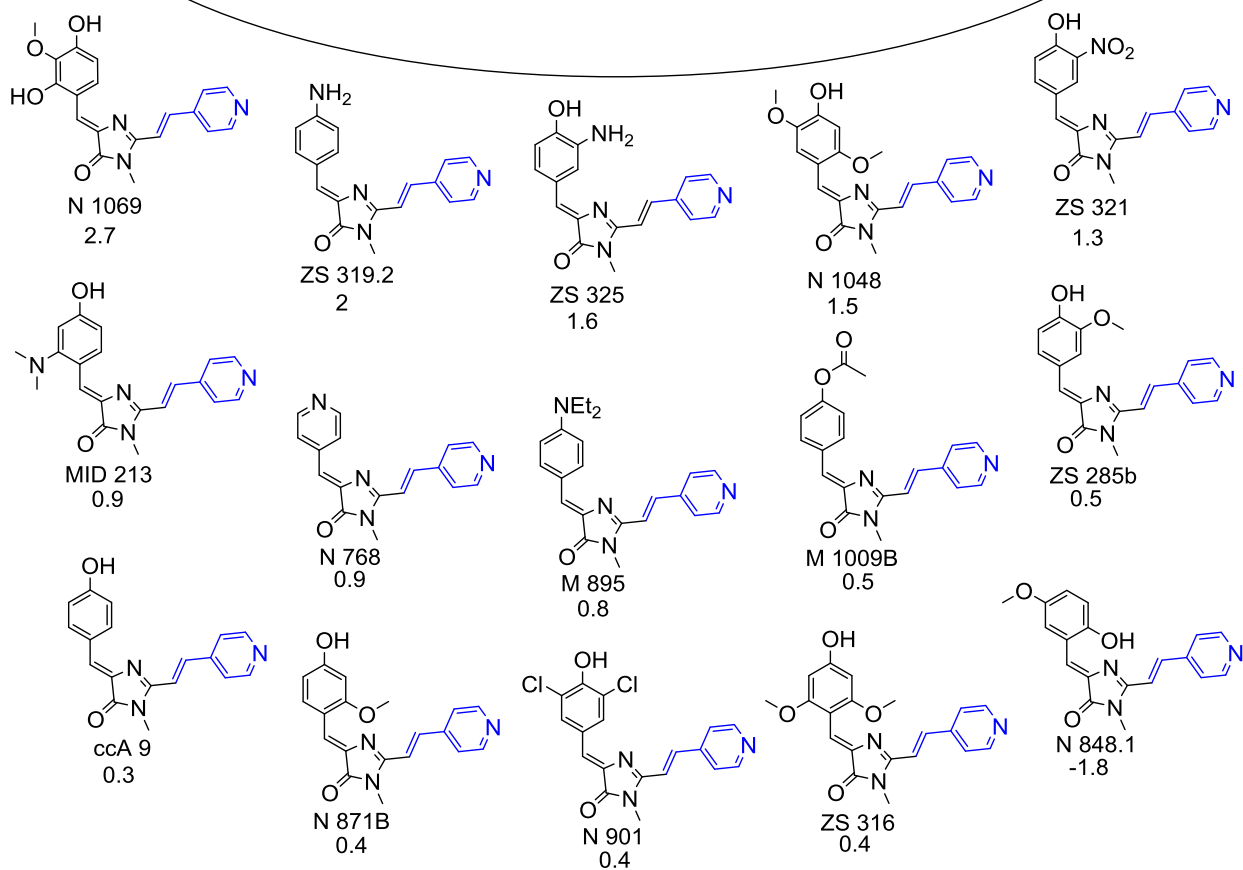

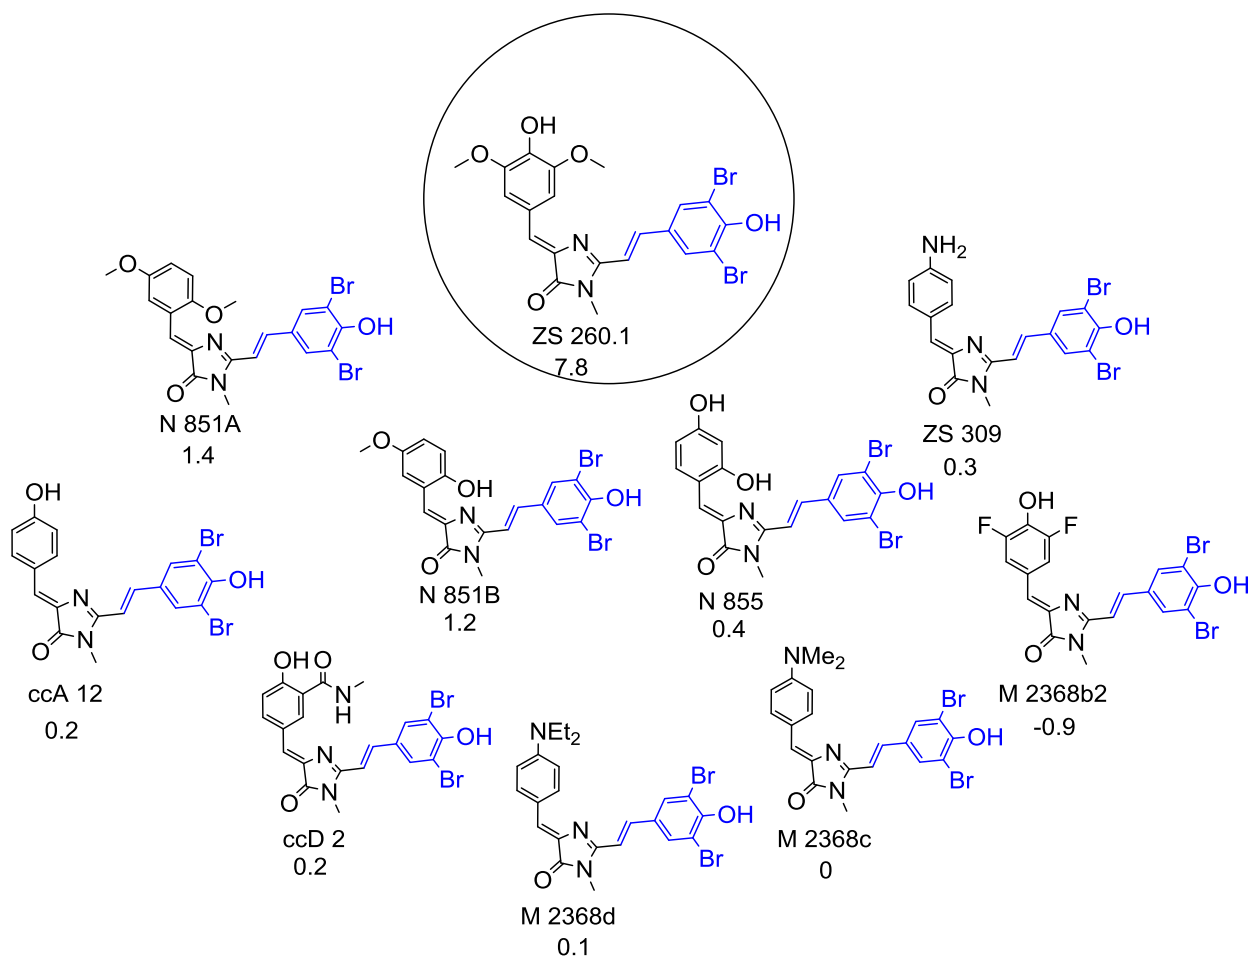

**Table S5. Comparison of stabilization of model G4s and double stranded control sequences by newly synthesized compounds.**

| $\Delta T_m^a$ | LTR III  | Telo    | Pu39     | Duplex   |
|----------------|----------|---------|----------|----------|
| N1193          | 14±0.5   | 9.5±0.1 | 3.8±0.04 | 0.6±0.1  |
| N1196          | 11.7±0.5 | 8.7±0.2 | 7.2±0.4  | 0.5±0.1  |
| N1197          | 11.3±0.2 | 4.6±0.2 | 7±0.7    | -0.4±0.2 |
| N1198          | 6.5±0.3  | 0.9±0.2 | 0.1±0.1  | 0±0.1    |
| N1199          | 4.3±0.2  | 0.9±0.1 | 0±0.2    | 0±0.1    |
| N1195          | 4.2±0.1  | 0.9±0.3 | 1.8±0.1  | 0.1±0.1  |

<sup>a</sup> -  $\Delta T_m = T_m^{\text{DNA target+ligand}} - T_m^{\text{DNA target}}$

**Table S6. Titration experiments for N1193, N1196, N1197 at various DNA:ligand molar ratios**

| Ligand | LTR-III G4/ligand molar ratio |         |         |
|--------|-------------------------------|---------|---------|
|        | 1:50                          | 1:20    | 1:2     |
| N1193  | 13.1±0.2 <sup>a</sup>         | 9.1±0.6 | 2.4±0.6 |
| N1196  | 11.3±0.3                      | 7.9±0.4 | 2±1     |
| N1197  | 11.4±0.2                      | 8.5±0.3 | 2.3±0.5 |

<sup>a</sup> -  $\Delta T_m = T_m^{\text{LTR-III+ligand}} - T_m^{\text{LTR-III}}$

## **Supplement S7. Synthetic procedures for the synthesized GFP chromophore analogues**

### **1. General**

Commercially available reagents were used without additional purification. E. Merck Kieselgel 60 was used for column chromatography. Thin layer chromatography (TLC) was performed on silica gel 60 F<sub>254</sub> glass-backed plates (MERCK). Visualization was effected by UV light (254 or 312nm) and staining with KMnO<sub>4</sub>.

NMR spectra were recorded on a 700 MHz Bruker Avance III NMR at 303 K and 800 MHz Bruker Avance III NMR at 333 K. Chemical shifts are reported relative to residue peaks of DMSO-d<sub>6</sub> (2.51 ppm for <sup>1</sup>H and 39.5 ppm for <sup>13</sup>C). Melting points were measured on a SMP 30 apparatus. High-resolution mass spectra (HRMS) spectra were recorded on a LTQ Orbitrap Elite (ThermoScientific) using electrospray ionization (ESI). The measurements were done in a positive ion mode (interface capillary voltage −5000 V) or in a negative ion mode (3500 V); interface temperature was set at 275 °C.

## 2. Synthetic procedures

### 2.1 Preparation of 5-(Z)-benzylidene-2-methyl-3-alkyl/aryl-3,5-dihydro-4H-imidazol-4-ones

General method was reported previously.<sup>1</sup>

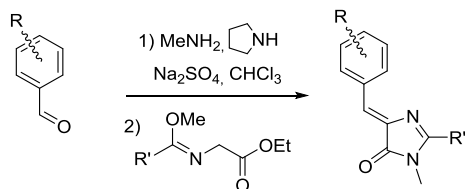

The corresponding aromatic aldehyde (10 mmol) was dissolved in  $\text{CHCl}_3$  (50 mL) and mixed with methylamine solution (40% aqueous, 2.5 mL), pyrrolidine (7 mg, 0.1 mmol) and anhydrous  $\text{Na}_2\text{SO}_4$  (10 g). The mixture was stirred for 48 h at room temperature, filtered and dried over the additional  $\text{Na}_2\text{SO}_4$ . The solvent was evaporated and corresponding ethyl((methoxy)amino)acetate (20 mmol) was added to the residue (5-10 mL of methanol was also added if it wouldn't mixed). The mixture was stirred for 24 h at room temperature, solvents were evaporated and the product was purified by column chromatography ( $\text{CHCl}_3$ -EtOH).

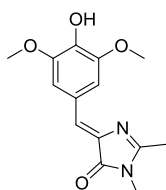

#### (Z)-5-(4-hydroxy-3,5-dimethoxybenzylidene)-2,3-dimethyl-3,5-dihydro-4H-imidazol-4-one (N 979)

$^1\text{H}$  NMR (300 MHz,  $\text{DMSO}-d_6$ )  $\delta$  ppm 9.15 (br. s., 1 H), 7.63 (s, 2 H), 6.90 (s, 1 H), 3.79 (s, 6 H), 3.08 (s, 3 H), 2.33 (s, 3 H). Previously characterized.<sup>2</sup>

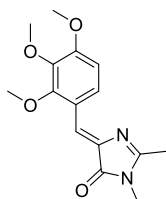

#### (Z)-5-(2,3,4-trimethoxybenzylidene)-2,3-dimethyl-3,5-dihydro-4H-imidazol-4-one (N 1043)

Yellow solid (1.86 g, 64%); mp = 192-195 °C;  $^1\text{H}$  NMR (700 MHz,  $\text{DMSO}-d_6$ )  $\delta$  ppm 8.53 (d,  $J=9.0$  Hz, 1 H), 7.13 (s, 1 H), 6.95 (d,  $J=9.0$  Hz, 1 H), 3.88-3.85 (m, 6 H), 3.77 (s, 3 H), 3.09 (s, 3 H), 2.34 (s, 3 H);  $^{13}\text{C}$  NMR (75 MHz,  $\text{DMSO}-d_6$ )  $\delta$  ppm 169.9, 163.5, 155.4, 153.3, 141.4,

<sup>1</sup> Baldrige A., Kowalik J., Tolbert L. M. *Synthesis* **2010**, 14, 2424.

<sup>2</sup> Paige J.S., Wu K.Y., Jaffrey S.R., *Science*, **2011**, 333 (6042), 642-646.

137.6, 127.6, 120.4, 118.0, 108.4, 61.7, 60.5, 56.0, 26.3, 15.4; HRMS (ESI)  $m/z$ : 291.1337 found (calcd for  $C_{15}H_{19}N_2O_4^+$ ,  $[M+H]^+$  291.1339).

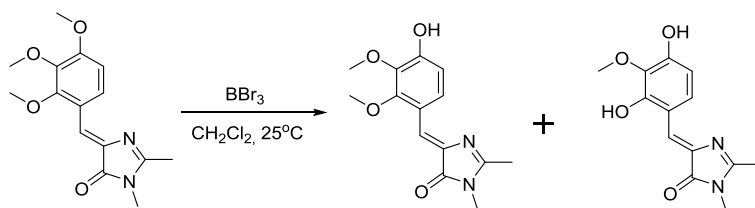

To the solution of (Z)-5-(2,3,4-trimethoxybenzylidene)-2,3-dimethyl-3,5-dihydro-4H-imidazol-4-one (5 mmol) in  $CH_2Cl_2$  (50 mL) borane tribromide in  $CH_2Cl_2$  (1M, 5 mL, 5 mmol) were added. The mixture was stirred for 2 h at room temperature under inert atmosphere. The mixture was diluted with  $CHCl_3$  (100 mL), washed with water (2x50 mL) and brine (2x50 mL) and dried over  $Na_2SO_4$ . The solvent was evaporated and the mixture of products was separated by column chromatography ( $CHCl_3$ -EtOH, 49:1).

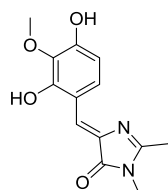

**(Z)-5-(2,4-dihydroxy-3-methoxybenzylidene)-2,3-dimethyl-3,5-dihydro-4H-imidazol-4-one (N 1042)**

Orange solid (0.46 g, 35%); mp = 231-234 °C;  $^1H$  NMR (300 MHz,  $DMSO-d_6$ )  $\delta$  ppm 12.71 (br. s., 1 H), 8.41 (br. s., 1 H), 7.37 (d,  $J=8.8$  Hz, 1 H), 7.12 (s, 1 H), 6.58 (d,  $J=8.8$  Hz, 1 H), 3.81 (s, 3 H), 3.12 (s, 3 H), 2.36 (s, 3 H);  $^{13}C$  NMR (75 MHz,  $DMSO-d_6$ )  $\delta$  ppm 167.9, 159.6, 151.3, 146.7, 134.6, 132.3, 125.9, 125.7, 114.4, 104.1, 55.8, 26.4, 15.1; HRMS (ESI)  $m/z$ : 263.1024 found (calcd for  $C_{13}H_{15}N_2O_4^+$ ,  $[M+H]^+$  263.1026).

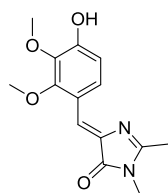

**(Z)-5-(4-hydroxy-2,3-dimethoxybenzylidene)-2,3-dimethyl-3,5-dihydro-4H-imidazol-4-one (N 1027)**

Yellow solid (0.41 g, 30%); mp = 193-196 °C;  $^1H$  NMR (300 MHz,  $DMSO-d_6$ )  $\delta$  ppm 12.44 (br. s., 1 H), 7.75 (d,  $J=8.9$  Hz, 1 H), 7.15 (s, 1 H), 6.64 (d,  $J=9.0$  Hz, 1 H), 3.83 (s, 3 H), 3.67 (s, 3 H), 3.12 (s, 3 H), 2.37 (s, 3 H);  $^{13}C$  NMR (75 MHz,  $DMSO-d_6$ )  $\delta$  ppm 168.1, 160.3, 156.2, 151.9, 136.7, 133.0, 130.4, 124.5, 115.1, 104.1, 59.8, 55.9, 26.4, 15.1; HRMS (ESI)  $m/z$ : 277.1178 found (calcd for  $C_{14}H_{17}N_2O_4^+$ ,  $[M+H]^+$  277.1183).



***tert*-butyl (Z)-2-(4-(4-hydroxy-3,5-dimethoxybenzylidene)-2-methyl-5-oxo-4,5-dihydro-1H-imidazol-1-yl)ethyl)carbamate (AR556)**

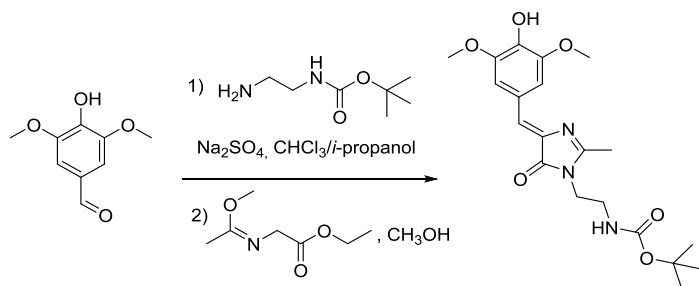

To a solution of 4-hydroxy-3,5-dimethoxybenzaldehyde (1.82 g, 10 mmol) in  $\text{CH}_2\text{Cl}_2$ /*i*-propanol (50 mL, v/v 10:1) *tert*-butyl (2-aminoethyl)carbamate (2.40 g, 15 mmol) and anhydrous  $\text{Na}_2\text{SO}_4$  (10 g) were added. The mixture was stirred for 48 h at room temperature, filtered and dried over anhydrous  $\text{Na}_2\text{SO}_4$ . The solvent was evaporated under reduced pressure and ethyl 2-((1-methoxyethylidene)amino)acetate (3.18 g, 20 mmol) was added to the residue followed by the addition of methanol (10 mL). The mixture was stirred for 24 h at room temperature, solvents were evaporated and the product was purified by column chromatography on silica gel (0-1% MeOH in  $\text{CH}_2\text{Cl}_2$ ). Yellow solid (2.93 g, 72 %);  $^1\text{H}$  NMR (700 MHz,  $\text{CDCl}_3$ )  $\delta$  ppm 7.50 (s, 2 H), 6.99 (s, 1 H), 5.92 (s, 1 H), 4.91-4.82 (m, 1H), 3.94 (s, 6 H), 3.75 (t,  $J=6.2$  Hz, 2 H), 3.38-3.32 (m, 2 H), 2.38 (s, 3 H), 1.42 (s, 9 H);  $^{13}\text{C}$  NMR (176 MHz,  $\text{CDCl}_3$ )  $\delta$  ppm 170.9, 161.2, 156.0, 147.0, 137.5, 136.7, 128.0, 125.7, 109.4, 79.8, 56.3, 40.3, 39.5, 28.3, 15.6; HRMS (ESI)  $m/z$ : 406.1971 found (calcd for  $\text{C}_{20}\text{H}_{28}\text{N}_3\text{O}_6^+$ ,  $[\text{M}+\text{H}]^+$  406.1973).

**Preparation of (Z)-3-(4-hydroxyphenethyl)-2-methyl-5-(thiophene-2-ylmethylene)-3,5-dihydro-4H-imidazol-4-one**

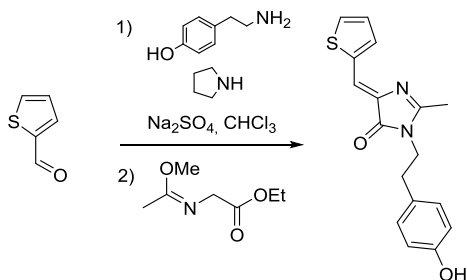

The thiophene-2-carbaldehyde (10 mmol) was dissolved in  $\text{CHCl}_3$  (50 mL) and mixed with 4-(2-aminoethyl)phenol (10.5 mmol), pyrrolidine (7 mg, 0.1 mmol) and anhydrous  $\text{Na}_2\text{SO}_4$  (10 g). The mixture was stirred for 72 h at room temperature, filtered and dried over the additional  $\text{Na}_2\text{SO}_4$ . The solvent was evaporated and ethyl((methoxy)amino)acetate (12 mmol) was added to the residue in 5 mL of methanol. The mixture was stirred for 4 days at room temperature, solvents were evaporated and the product was purified by column chromatography ( $\text{CHCl}_3$ -EtOH 50/1).

Yellow solid (2.22 g, 71%); mp ~200 °C with decomposition;  $^1\text{H}$  NMR (700 MHz, DMSO- $d_6$ )  $\delta$  ppm 9.22 (s, 1 H), 7.84 (d,  $J=5.0$  Hz, 1 H), 7.66 (d,  $J=3.4$  Hz, 1 H), 7.29 (s, 1 H), 7.15 (dd,  $J=5.1, 3.7$  Hz, 1 H), 6.97 (d,  $J=8.4$  Hz, 2 H), 6.67 (d,  $J=8.4$  Hz, 2 H), 3.70 (t,  $J=7.1$  Hz, 2 H), 2.74 (t,  $J=7.1$  Hz, 2 H), 2.05 (s, 3 H);  $^{13}\text{C}$  NMR (75 MHz, DMSO- $d_6$ )  $\delta$  ppm 169.0, 162.3, 156.0, 137.3, 136.1, 134.7, 134.2, 129.8, 128.2, 127.6, 119.0, 115.3, 42.1, 33.5, 15.1; HRMS (ESI)  $m/z$ : 313.1003 found (calcd for  $\text{C}_{17}\text{H}_{17}\text{N}_2\text{O}_2\text{S}^+$ ,  $[\text{M}+\text{H}]^+$  313.1005).

## 2.2 Preparation of 5-(*Z*)-benzylidene-2-(*E*)-arylvinyl-3-methyl-3,5-dihydro-4*H*-imidazol-4-ones

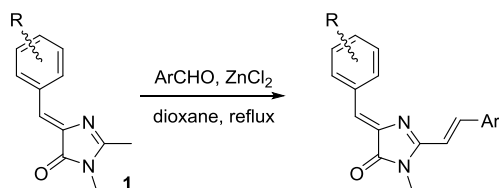

To the solution of 5-(*Z*)-benzylidene-2,3-dimethyl-3,5-dihydro-4*H*-imidazol-4-one (1 mmol) in dioxane (5 mL) anhydrous zinc chloride (30 mg, 0.22 mmol) and corresponding aldehyde (1.2 mmol) were added. The mixture was refluxed for 1-6 h and the solvent was evaporated. The mixture was dissolved in EtOAc (50 mL) and washed by EDTA solution (0.5%, 10 mL), water (3x10 mL) and brine (1x10 mL). The mixture was dried over Na<sub>2</sub>SO<sub>4</sub>. The solvent was evaporated and the product was purified by column chromatography (CHCl<sub>3</sub>-EtOH, typically 19:1).

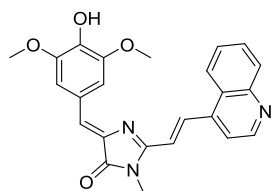

### 5-((*Z*)-4-hydroxy-3,5-dimethoxybenzylidene)-3-methyl-2-((*E*)-2-(quinolin-4-yl)vinyl)-3,5-dihydro-4*H*-imidazol-4-one (N 1196)

Dark red solid (95 mg, 23%); mp = 273-276°C; <sup>1</sup>H NMR (700 MHz, DMSO-*d*<sub>6</sub>) δ ppm 9.30 (br. s., 1 H), 9.01 (d, *J*=4.6 Hz, 1 H), 8.77 (d, *J*=15.6 Hz, 1 H), 8.28 (d, *J*=8.4 Hz, 1 H), 8.09 - 8.13 (m, 2 H), 7.81 - 7.89 (m, 3 H), 7.74 (t, *J*=7.4 Hz, 1 H), 7.60 (d, *J*=15.6 Hz, 1 H), 7.10 (s, 1 H), 3.92 (s, 6 H), 3.34 (s, 3 H); <sup>13</sup>C NMR (201 MHz, DMSO-*d*<sub>6</sub>) δ ppm 169.7, 158.1, 150.2, 148.3, 147.8, 139.3, 139.0, 137.0, 132.4, 129.8, 129.6, 127.6, 127.2, 125.4, 124.9, 122.7, 120.2, 118.0, 110.4, 55.7, 26.3; HRMS (ESI) *m/z*: 414.1463 found (calcd for C<sub>24</sub>H<sub>20</sub>N<sub>3</sub>O<sub>4</sub><sup>+</sup>, [M-H]<sup>+</sup> 414.1459).

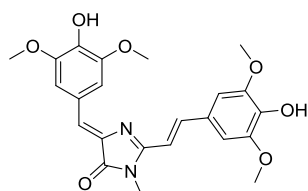

### 5-((*Z*)-4-hydroxy-3,5-dimethoxybenzylidene)-2-((*E*)-4-hydroxy-3,5-dimethoxystyryl)-3-methyl-3,5-dihydro-4*H*-imidazol-4-one (N 1193)

Red solid (62 mg, 39%); mp = 235-238 °C; <sup>1</sup>H NMR (700 MHz, DMSO-*d*<sub>6</sub>) δ ppm 9.13 (s, 1 H), 9.01 (s, 1 H), 7.89 (d, *J*=15.6 Hz, 1 H), 7.74 (s, 2 H), 7.10 (s, 2 H), 7.06 (d, *J*=15.6 Hz, 1 H), 6.92 (s, 1 H), 3.87 (s, 6 H), 3.85 (s, 6 H), 3.29 (s, 3 H); <sup>13</sup>C NMR (176 MHz, DMSO-*d*<sub>6</sub>) δ ppm

170.0, 159.1, 148.1, 147.9, 140.6, 138.5, 138.5, 137.4, 125.7, 125.2, 125.1, 110.9, 110.1, 106.5, 56.2, 56.0, 26.4; HRMS (ESI)  $m/z$ : 439.1516 found (calcd for  $C_{23}H_{23}N_2O_7^-$ ,  $[M-H]^-$  439.1511).

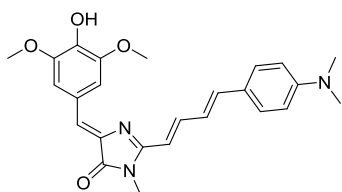

**2-((1E,3E)-4-(4-(dimethylamino)phenyl)buta-1,3-dien-1-yl)-5-((Z)-4-hydroxy-3,5-dimethoxybenzylidene)-3-methyl-3,5-dihydro-4H-imidazol-4-one (N 1195)**

Dark red solid (52 mg, 12%); mp  $\sim 200^\circ\text{C}$  with decomposition;  $^1\text{H}$  NMR (700 MHz,  $\text{DMSO}-d_6$ )  $\delta$  ppm 9.12 (br. s., 1 H), 7.69 - 7.74 (m, 3 H), 7.45 (d,  $J=8.8$  Hz, 2 H), 6.97 - 7.06 (m, 2 H), 6.89 (s, 1 H), 6.74 (d,  $J=9.0$  Hz, 2 H), 6.55 (d,  $J=14.7$  Hz, 1 H), 3.86 (s, 6 H), 3.19 (s, 3 H), 2.98 (s, 6 H);  $^{13}\text{C}$  NMR (201 MHz,  $\text{DMSO}-d_6$ )  $\delta$  ppm 169.7, 158.8, 150.8, 147.8, 141.3, 140.5, 138.4, 137.6, 128.6, 125.2, 124.6, 123.8, 123.0, 113.7, 112.0, 110.0, 56.0, 40.0, 26.1; HRMS (ESI)  $m/z$ : 434.2066 found (calcd for  $C_{25}H_{28}N_3O_4^+$ ,  $[M+H]^+$  434.2074).

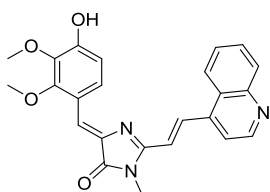

**5-((Z)-4-hydroxy-2,3-dimethoxybenzylidene)-3-methyl-2-((E)-2-(quinolin-4-yl)vinyl)-3,5-dihydro-4H-imidazol-4-one (N 1197)**

Red solid (104 mg, 69%); mp =  $216-219^\circ\text{C}$ ;  $^1\text{H}$  NMR (700 MHz,  $\text{DMSO}-d_6$ )  $\delta$  ppm 11.75 (br. s., 1 H), 9.01 (d,  $J=4.6$  Hz, 1 H), 8.59 (d,  $J=15.8$  Hz, 1 H), 8.36 (d,  $J=8.4$  Hz, 1 H), 8.16 (d,  $J=8.8$  Hz, 1 H), 8.12 (d,  $J=8.4$  Hz, 1 H), 8.08 (d,  $J=4.4$  Hz, 1 H), 7.86 (t,  $J=7.5$  Hz, 1 H), 7.6 (t,  $J=7.6$  Hz, 1 H), 7.56 (d,  $J=15.6$  Hz, 1 H), 7.39 (s, 1 H), 6.74 (d,  $J=9.0$  Hz, 1 H), 3.88 (s, 3 H), 3.74 (s, 3 H), 3.36 (s, 3 H);  $^{13}\text{C}$  NMR (176 MHz,  $\text{DMSO}-d_6$ )  $\delta$  ppm 168.5, 156.3, 156.2, 152.0, 150.3, 148.3, 139.5, 136.5, 134.4, 133.0, 130.2, 129.8, 129.7, 127.4, 125.3, 123.2, 120.2, 118.4, 115.7, 104.6, 59.9, 55.9, 26.7; HRMS (ESI)  $m/z$ : 416.1601 found (calcd for  $C_{24}H_{22}N_3O_4^+$ ,  $[M+H]^+$  416.1605).

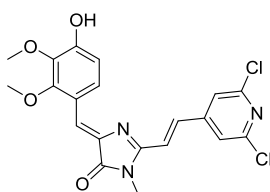

**2-((E)-2-(2,6-dichloropyridin-4-yl)vinyl)-5-((Z)-4-hydroxy-2,3-dimethoxybenzylidene)-3-methyl-3,5-dihydro-4H-imidazol-4-one (N 1198)**

Red solid (94 mg, 60%); mp  $\sim 260^\circ\text{C}$  with decomposition;  $^1\text{H}$  NMR (700 MHz,  $\text{DMSO}-d_6$ )  $\delta$  ppm 8.18 (d,  $J=8.8$  Hz, 1 H), 8.10 (s, 2 H), 7.80 (d,  $J=16.0$  Hz, 1 H), 7.67 (d,  $J=16.0$  Hz, 1 H),

[Back to Contents](#)

7.39 (s, 1 H), 6.68 (d,  $J=9.0$  Hz, 1 H), 3.87 (s, 3 H), 3.72 (s, 3 H), 3.31 (s, 3 H);  $^{13}\text{C}$  NMR (176 MHz,  $\text{DMSO}-d_6$ )  $\delta$  ppm 168.6, 156.3, 155.9, 152.0, 149.9, 148.8, 136.3, 134.7, 133.8, 130.0, 121.7, 121.3, 115.7, 104.5, 60.0, 55.9, 26.7; HRMS (ESI)  $m/z$ : 432.0530 found (calcd for  $\text{C}_{20}\text{H}_{16}\text{Cl}_2\text{N}_3\text{O}_4^-$ ,  $[\text{M}-\text{H}]^-$  432.0523).

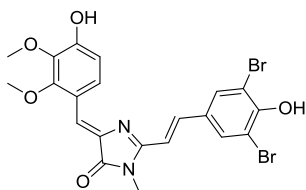

**2-((*E*)-3,5-dibromo-4-hydroxystyryl)-5-((*Z*)-4-hydroxy-2,3-dimethoxybenzylidene)-3-methyl-3,5-dihydro-4*H*-imidazol-4-one (N 1199)**

Red solid (101 mg, 52%); mp  $\sim 250$  °C with decomposition;  $^1\text{H}$  NMR (700 MHz,  $\text{DMSO}-d_6$ )  $\delta$  ppm 8.14 (s, 2 H), 8.00 (d,  $J=9.3$  Hz, 1 H), 7.73 (d,  $J=15.4$  Hz, 1 H), 7.21 - 7.26 (m, 2 H), 6.67 (d,  $J=9.2$  Hz, 1 H), 3.86 (s, 3 H), 3.72 (s, 3 H), 3.30 (s, 3 H);  $^{13}\text{C}$  NMR (176 MHz,  $\text{DMSO}-d_6$ )  $\delta$  ppm 168.5, 156.5, 156.1, 152.2, 151.8, 137.2, 137.2, 136.5, 134.3, 132.2, 130.2, 129.7, 115.8, 113.3, 112.2, 104.4, 59.9, 55.8, 26.6; HRMS (ESI)  $m/z$ : 534.9524 found (calcd for  $\text{C}_{21}\text{H}_{17}\text{Br}_2\text{N}_2\text{O}_5^-$ ,  $[\text{M}-\text{H}]^-$  534.9510).

***tert*-butyl (2-(2-((*E*)-3,5-dibromo-4-hydroxystyryl)-4-((*Z*)-4-hydroxy-3,5-dimethoxybenzylidene)-5-oxo-4,5-dihydro-1*H*-imidazol-1-yl)ethyl)carbamate (AR558)**

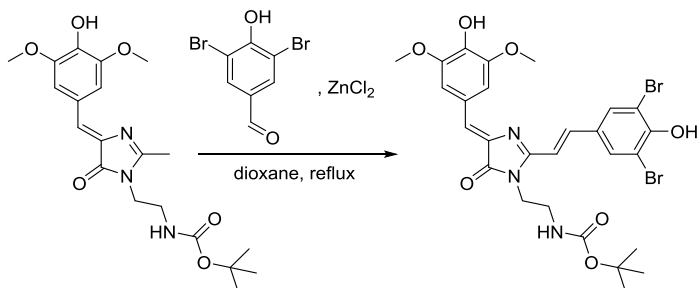

To the solution of AR556 (405 mg, 1 mmol) in dioxane (5 mL) anhydrous zinc chloride (30 mg, 0.22 mmol) and 3,5-dibromo-4-hydroxybenzaldehyde (340 mg, 1.2 mmol) were added. The mixture was refluxed for 4 h and the solvent was evaporated. The mixture was dissolved in EtOAc (50 mL), washed by EDTA solution (0.5%, 10 mL), water (3x10 mL) and brine (1x10 mL), followed by drying over  $\text{Na}_2\text{SO}_4$ . The solvent was evaporated and the product was purified by column chromatography on silica gel (0-2% EtOH in  $\text{CH}_2\text{Cl}_2$ ). Orange solid (148 mg, 22 %);  $^1\text{H}$  NMR (700 MHz,  $\text{DMSO}-d_6$ )  $\delta$  ppm 10.42 (br s, 1 H), 9.16 (s, 1 H), 8.05 (s, 2 H), 7.79 (d,  $J=15.7$  Hz, 1 H), 7.71 (s, 2 H), 7.14 (d,  $J=15.7$  Hz, 1 H), 6.97 (t,  $J=5.7$  Hz, 1 H), 6.94 (s, 1 H), 3.86 (s, 6 H), 3.78 (t,  $J=5.5$  Hz, 2 H), 3.16-3.10 (m, 2 H), 1.29 (s, 9 H);  $^{13}\text{C}$  NMR (176 MHz,  $\text{CDCl}_3$ )  $\delta$  ppm 169.6, 158.0, 155.6, 152.2, 147.7, 138.4, 137.0, 136.2, 131.8, 129.6, 125.8, 124.9,

113.4, 112.2, 109.9, 77.7, 55.9, 2×C overlap with DMSO, 28.0; HRMS (ESI)  $m/z$ : 666.0442 found (calcd for  $C_{27}H_{30}Br_2N_3O_7^+$ ,  $[M+H]^+$  666.0445).

**Preparation of (Z)-3-(4-hydroxyphenethyl)-2-((E)-4-hydroxystyryl)-5-(thiophen-2-ylmethylene)-3,5-dihydro-4H-imidazol-4-one (MID 161)**

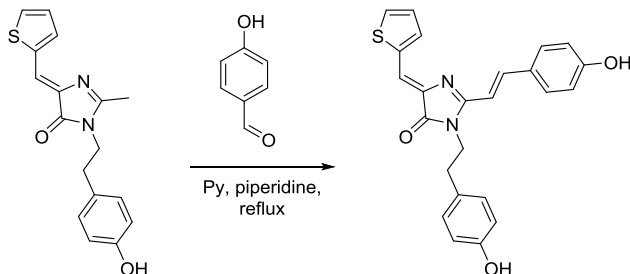

To the solution of (Z)-3-(4-hydroxyphenethyl)-2-methyl-5-(thiophene-2-ylmethylene)-3,5-dihydro-4H-imidazol-4-one (1 mmol) in pyridine (5 mL) piperidine (0.02 mL) and corresponding aldehyde (5 mmol) were added. The mixture was refluxed for 15 h and the solvent was evaporated. The mixture was dissolved in EtOAc (35 mL) and washed with phosphate buffer (pH = 7, 3x15 mL), brine (3x25 mL) and dried over  $Na_2SO_4$ . The solvent was evaporated and product was purified by column chromatography (Hexane-EtOAc 3/1).

Orange solid (200 mg, 48%); mp ~200 °C with decomposition;  $^1H$  NMR (700 MHz,  $DMSO-d_6$ )  $\delta$  ppm 10.04 (br. s., 1 H), 9.13 (s, 1 H), 7.87 (d,  $J=5.0$  Hz, 1 H), 7.81 (d,  $J=15.6$  Hz, 1 H), 7.69 (d,  $J=2.9$  Hz, 1 H), 7.59 (d,  $J=8.2$  Hz, 2 H), 7.28 (s, 1 H), 7.16 - 7.18 (m, 1 H), 7.01 (d,  $J=7.8$  Hz, 2 H), 6.85 (d,  $J=7.6$  Hz, 2 H), 6.69 (d,  $J=15.4$  Hz, 1 H), 6.64 (d,  $J=8.2$  Hz, 2 H), 3.93 (t,  $J=6.9$  Hz, 2 H), 2.76 (t,  $J=6.8$  Hz, 2 H);  $^{13}C$  NMR (75 MHz,  $DMSO-d_6$ )  $\delta$  ppm 169.1, 159.7, 159.2, 155.9, 140.3, 138.2, 137.2, 134.3, 134.2, 130.4, 129.9, 128.1, 127.7, 126.3, 118.0, 115.9, 115.2, 109.9, 41.2, 34.2; HRMS (ESI)  $m/z$ : 417.1263 found (calcd for  $C_{24}H_{21}N_2O_3S^+$ ,  $[M+H]^+$  417.1267).

**2-(2-((E)-3,5-dibromo-4-hydroxystyryl)-4-((Z)-4-hydroxy-3,5-dimethoxybenzylidene)-5-oxo-4,5-dihydro-1H-imidazol-1-yl)ethan-1-aminium chloride (AR559)**

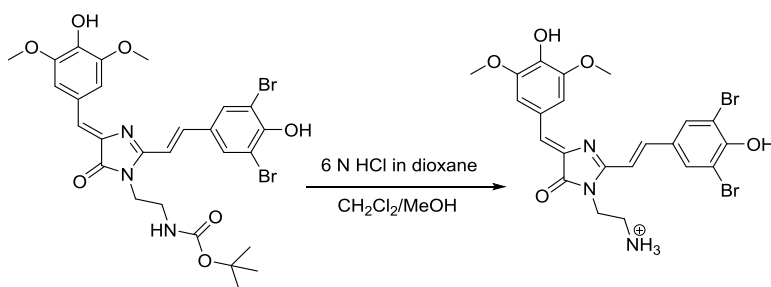

To a solution of AR558 (120 mg, 0.18 mmol) in  $CH_2Cl_2$ /methanol (10 mL, v/v 10:1) 6N HCl in dioxane (0.5 mL) was added and the mixture was stirred for 48 h at room temperature. The

precipitate formed was filtered, washed with cold  $\text{CH}_2\text{Cl}_2$  (2 x 5 mL) and dried in high vacuum. Red solid (85 mg, 83%);  $^1\text{H}$  NMR (700 MHz,  $\text{DMSO}-d_6$ )  $\delta$  ppm 10.47 (br s, 1 H), 9.22 (s, 1 H), 8.12 (s, 2 H), 8.09-7.99 (m, 3 H), 7.83 (d,  $J=15.4$  Hz, 1 H), 7.74 (s, 2 H), 7.21 (d,  $J=15.4$  Hz, 1 H), 7.00 (s, 1 H), 4.05 (t,  $J=5.4$  Hz, 2 H), 3.87 (s, 6 H), 3.12-3.03 (m, 2 H);  $^{13}\text{C}$  NMR (176 MHz,  $\text{CDCl}_3$ )  $\delta$  ppm 170.1, 157.5, 152.0, 147.8, 138.7, 137.0, 136.7, 132.2, 129.9, 126.4, 124.9, 113.4, 112.1, 110.0, 55.9, 40.1, 38.0; HRMS (ESI)  $m/z$ : 565.9918 found (calcd for  $\text{C}_{22}\text{H}_{22}\text{Br}_2\text{N}_3\text{O}_5^+$ ,  $[\text{M}-\text{Cl}]^+$  565.9921).

### 3. Copies of $^1\text{H}$ and $^{13}\text{C}$ NMR spectra

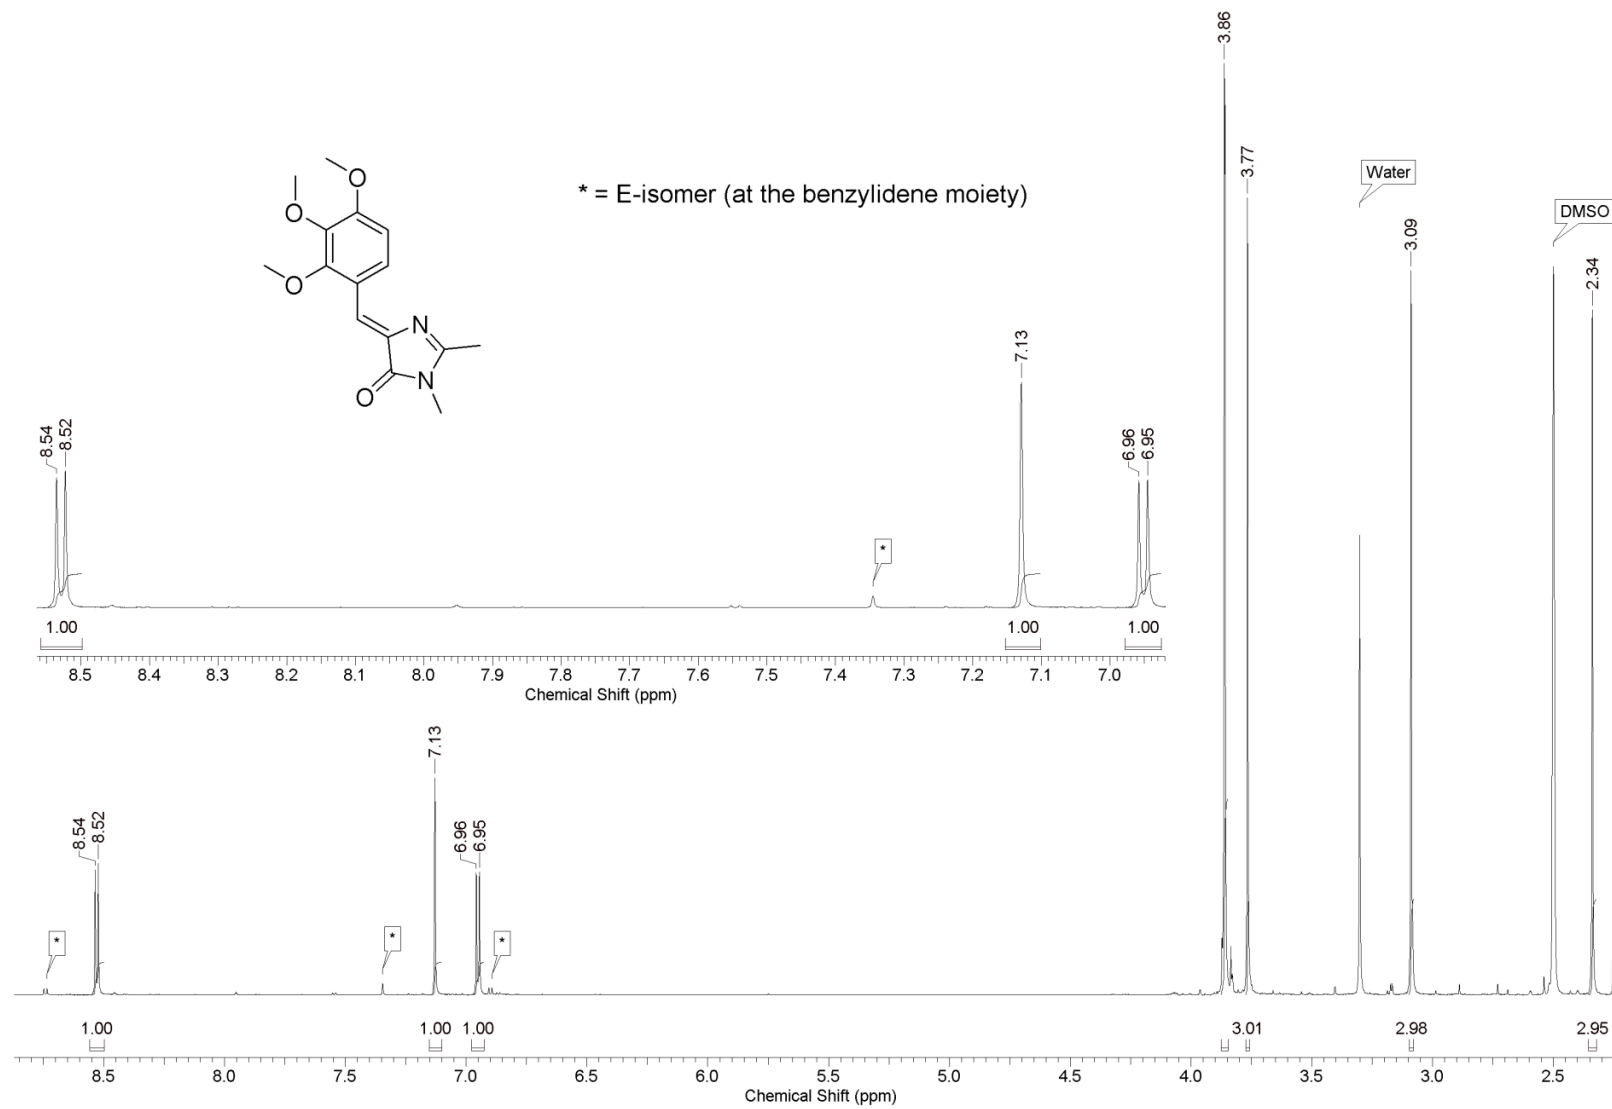



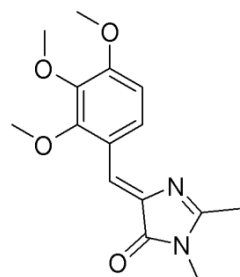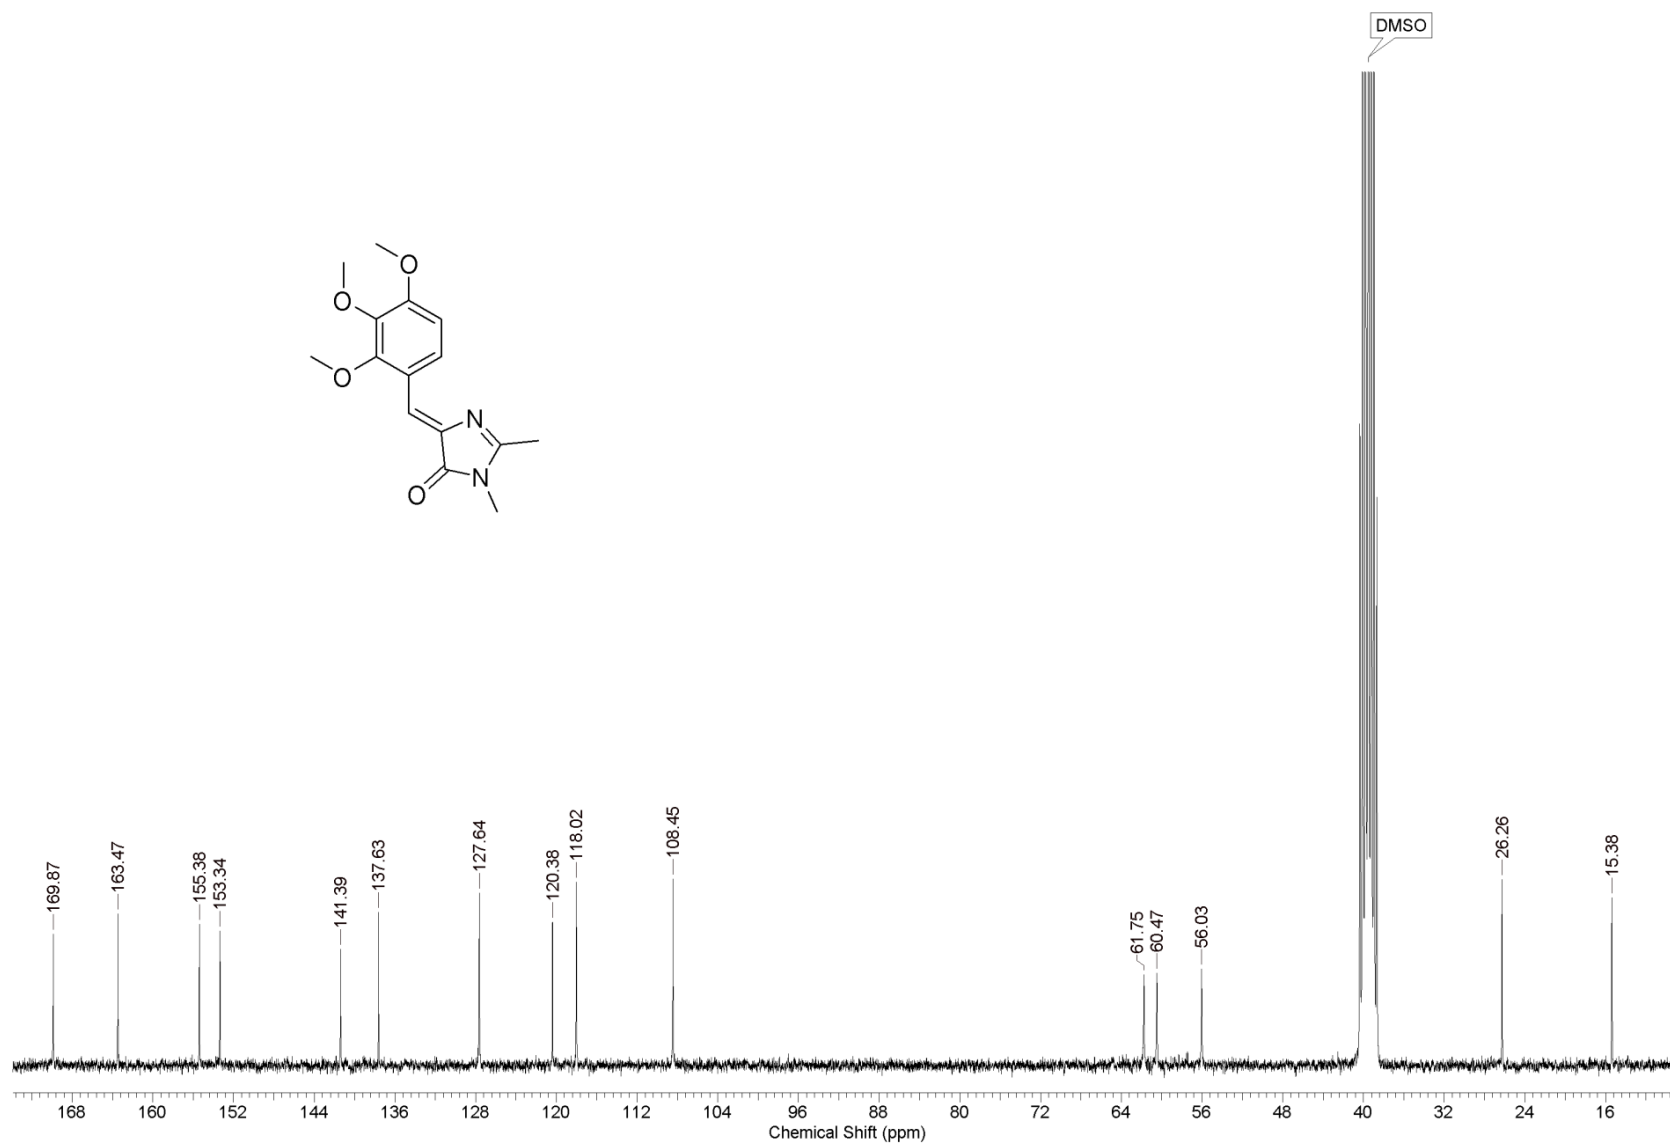

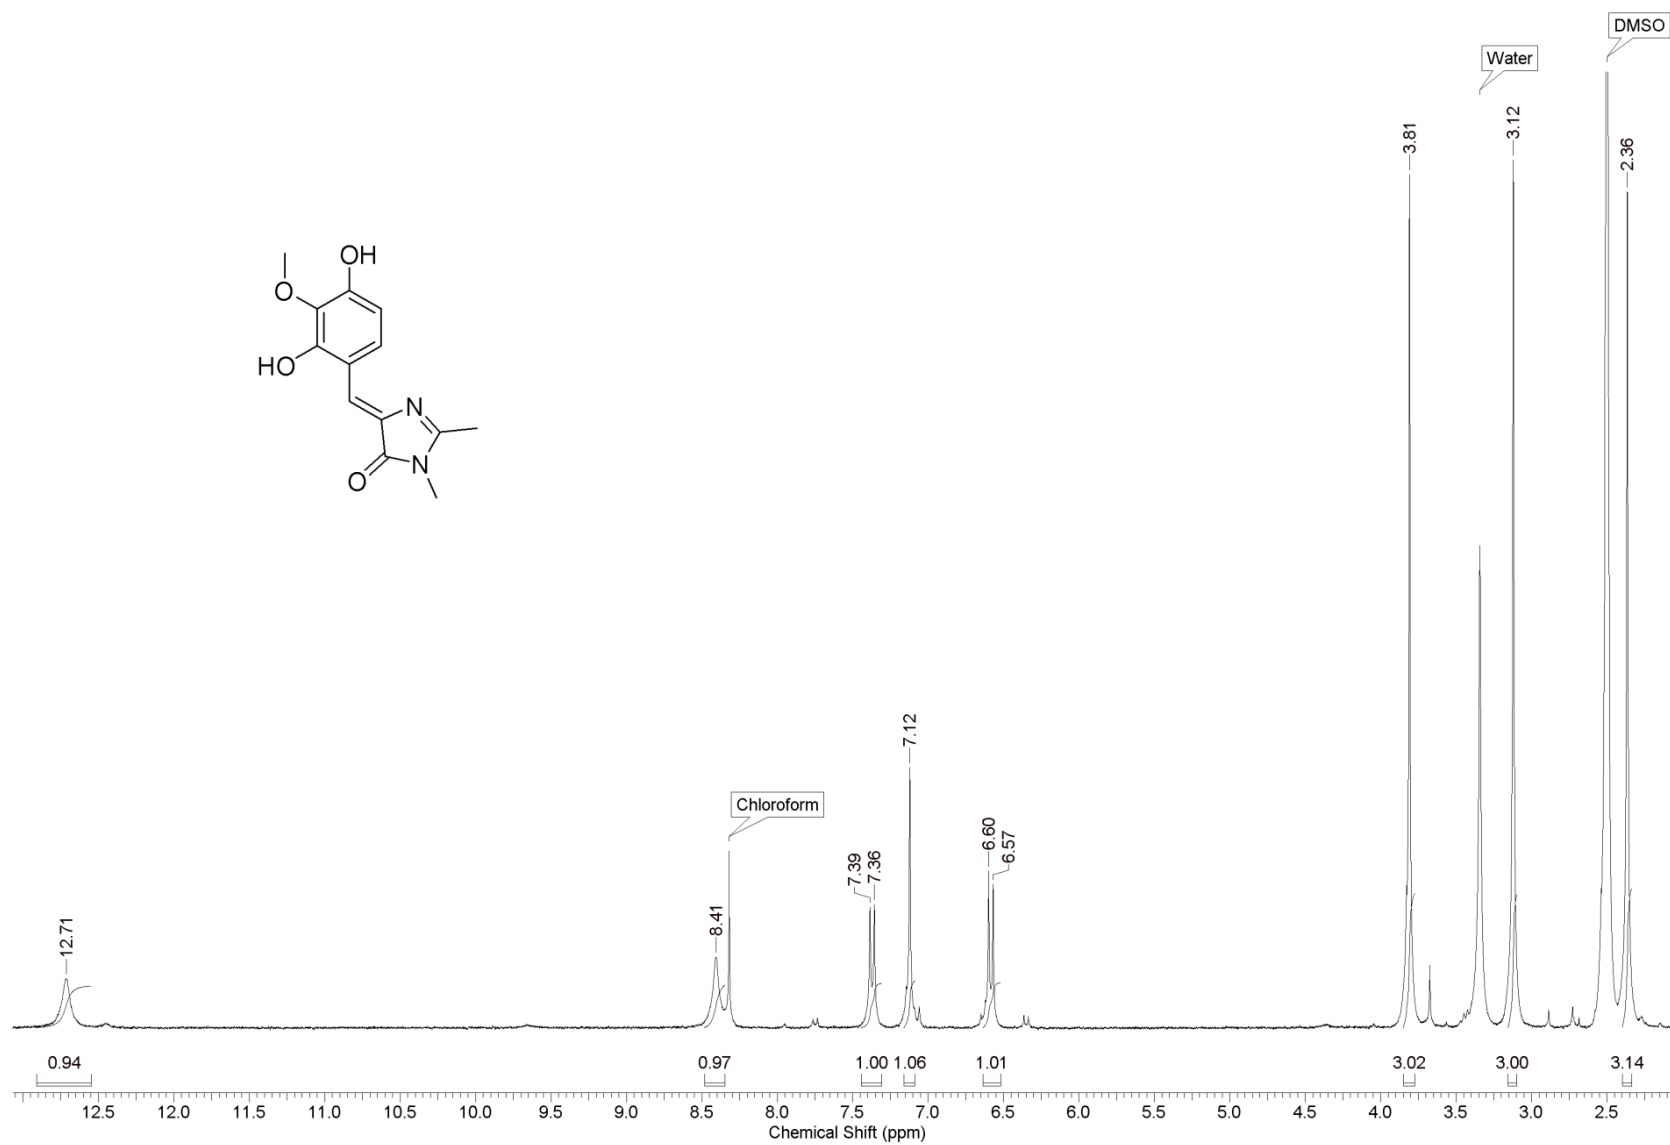

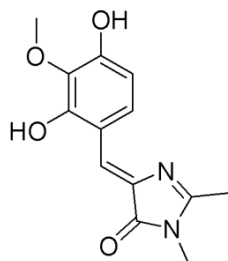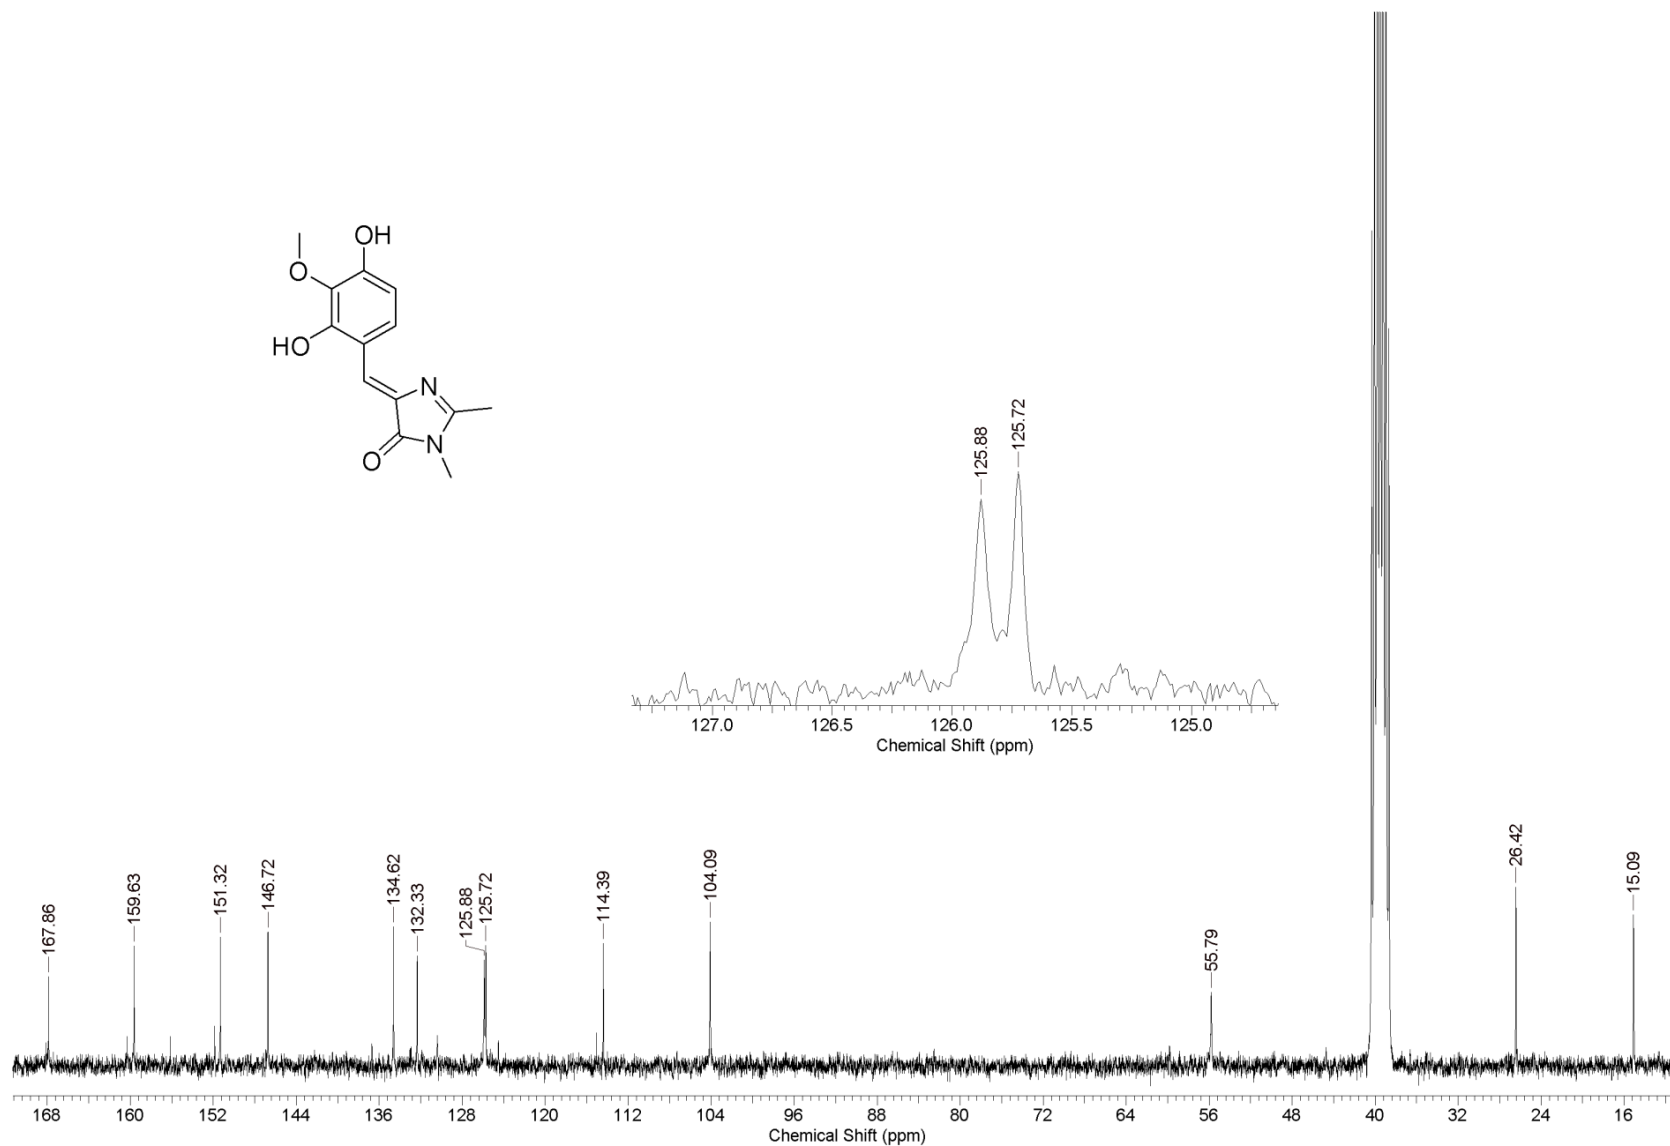

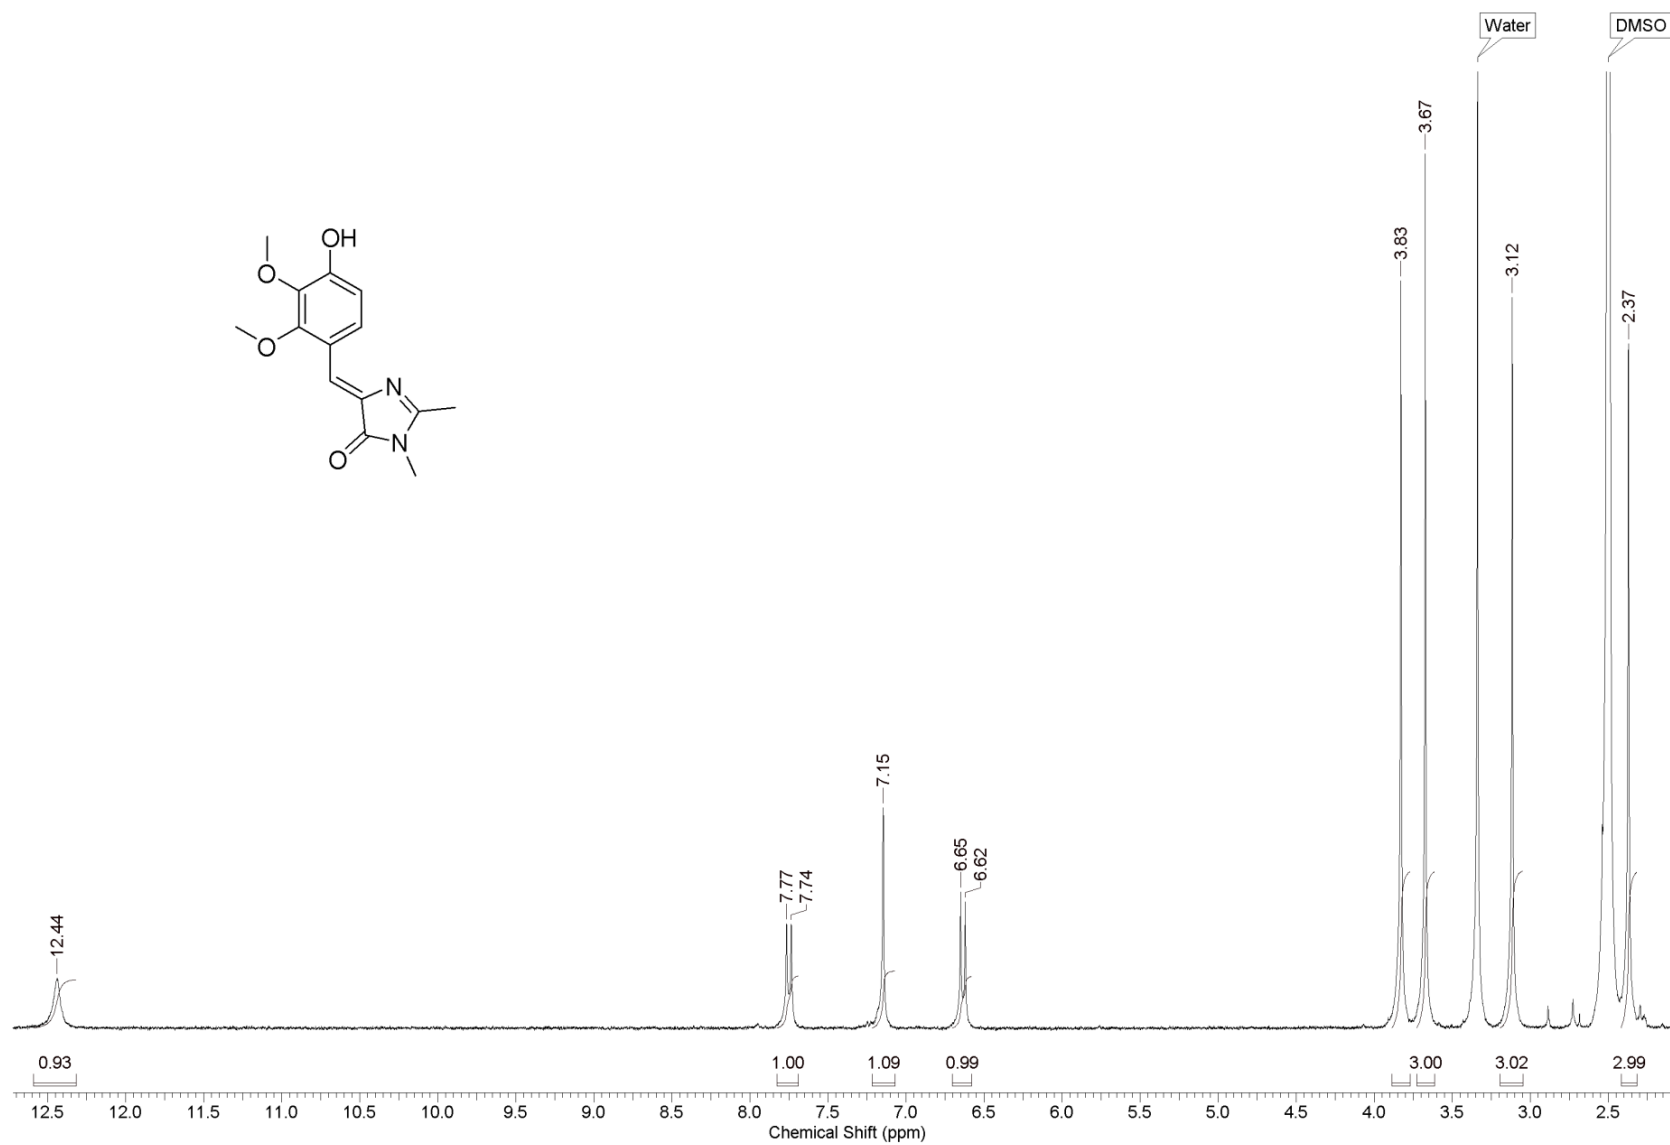

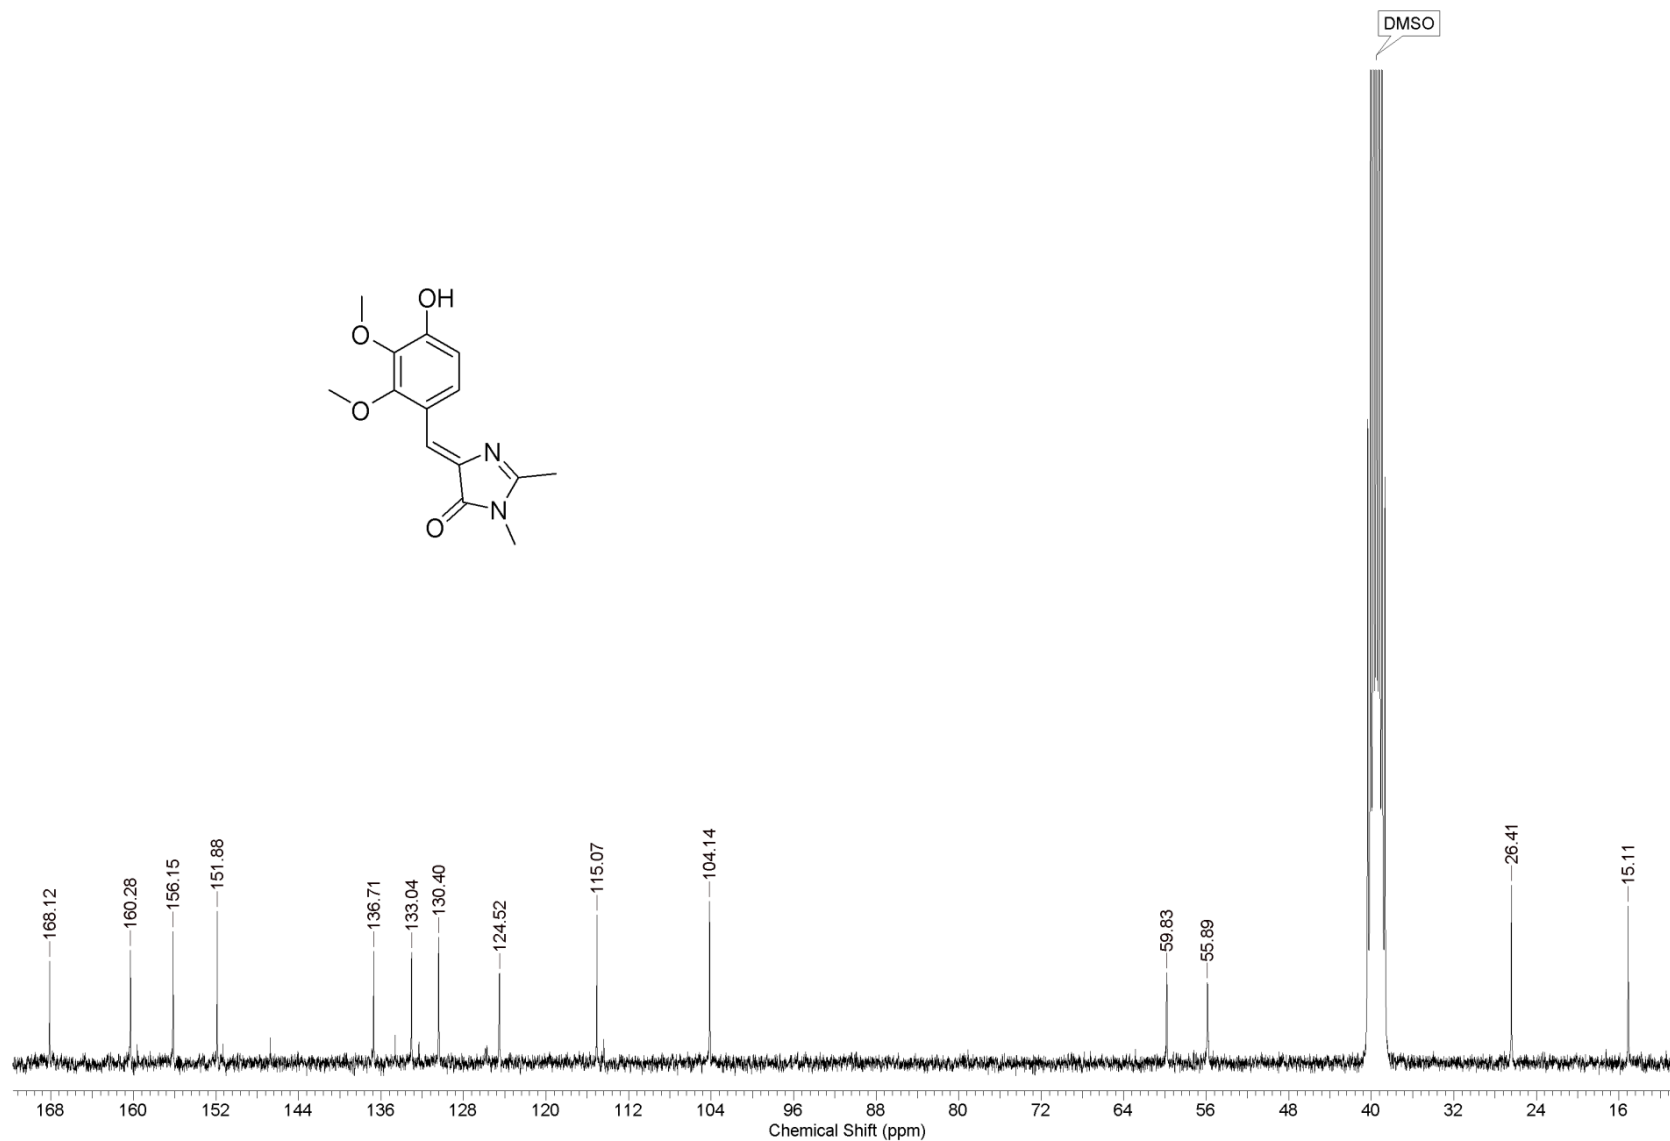

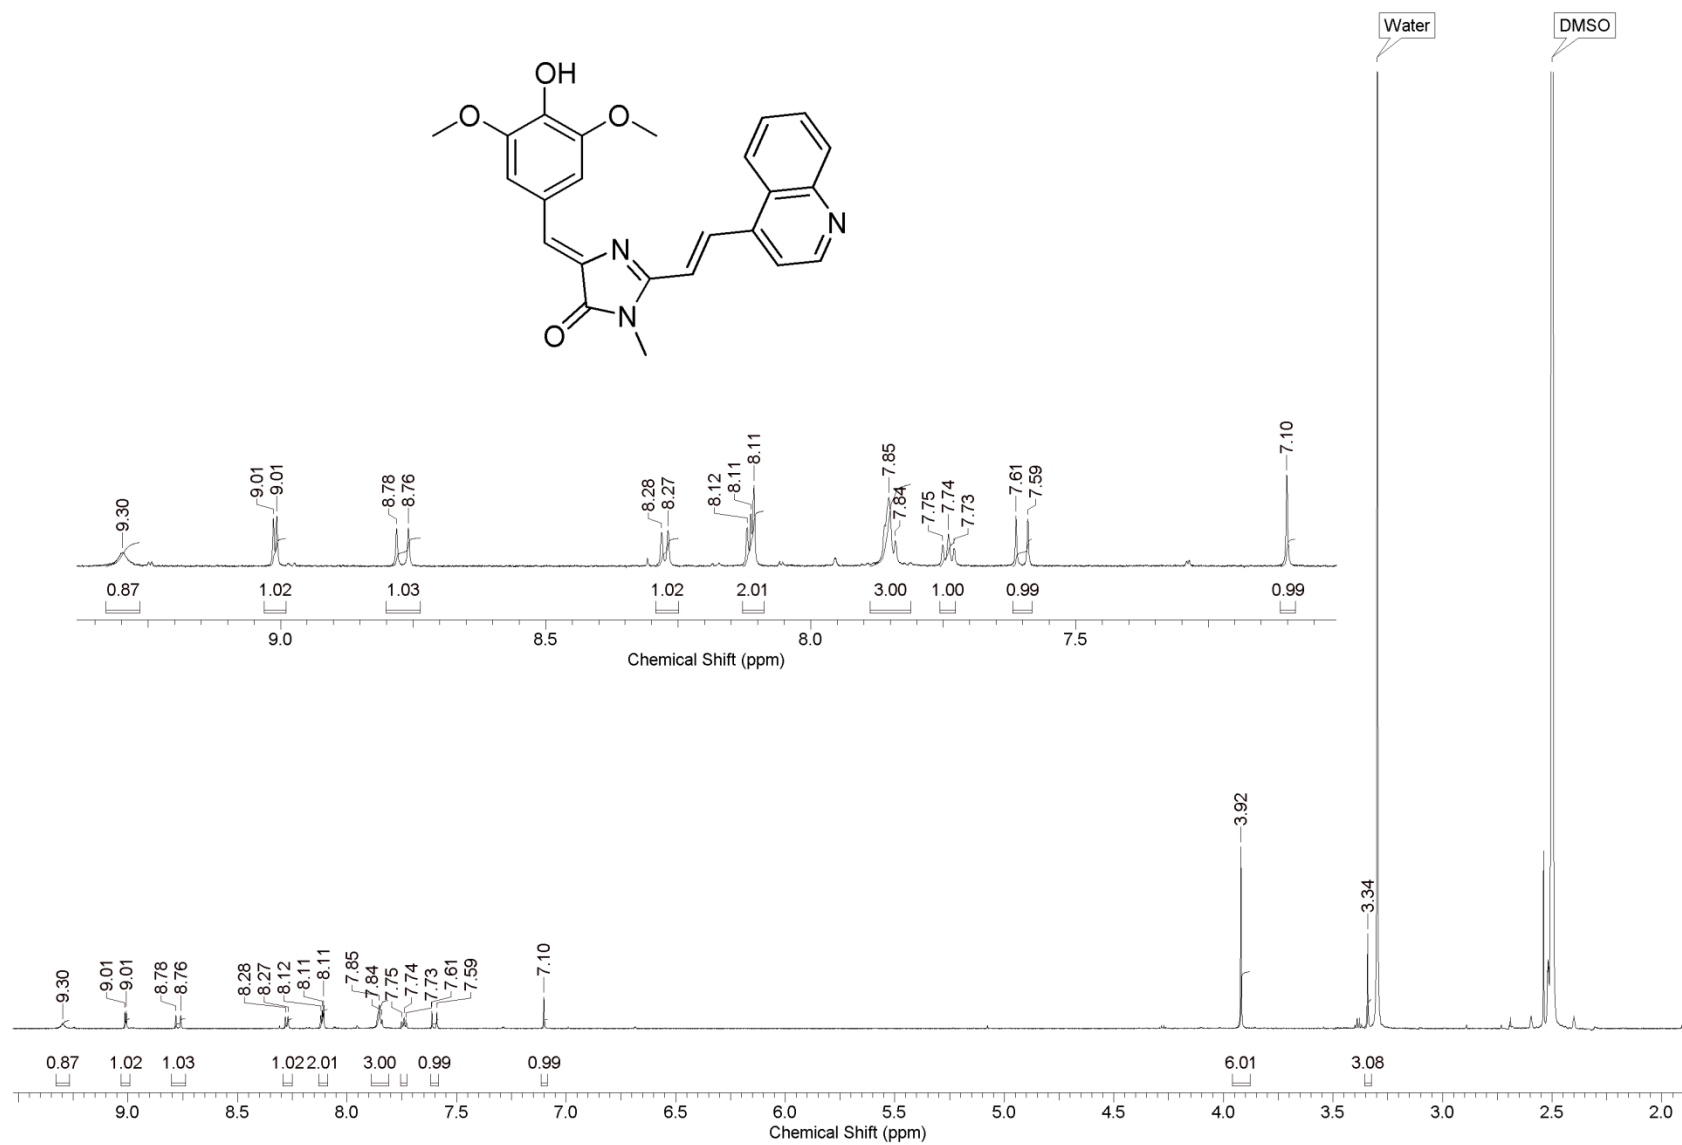

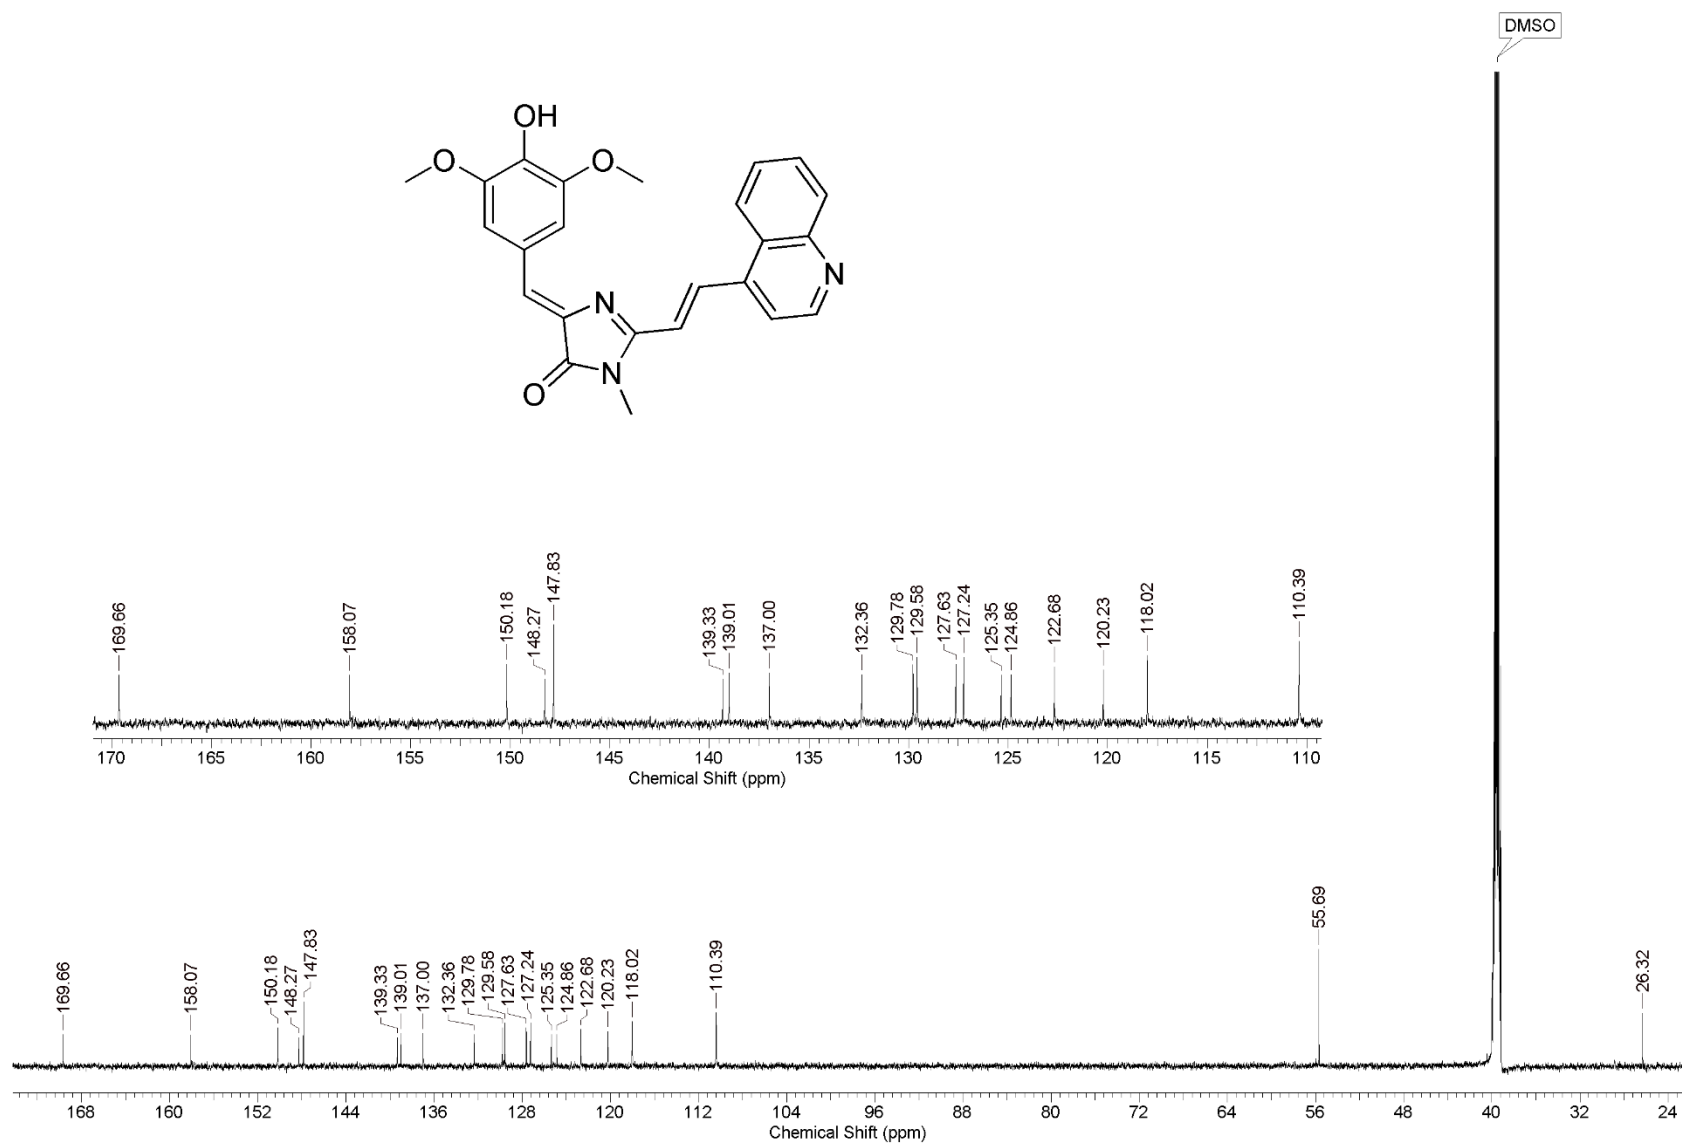

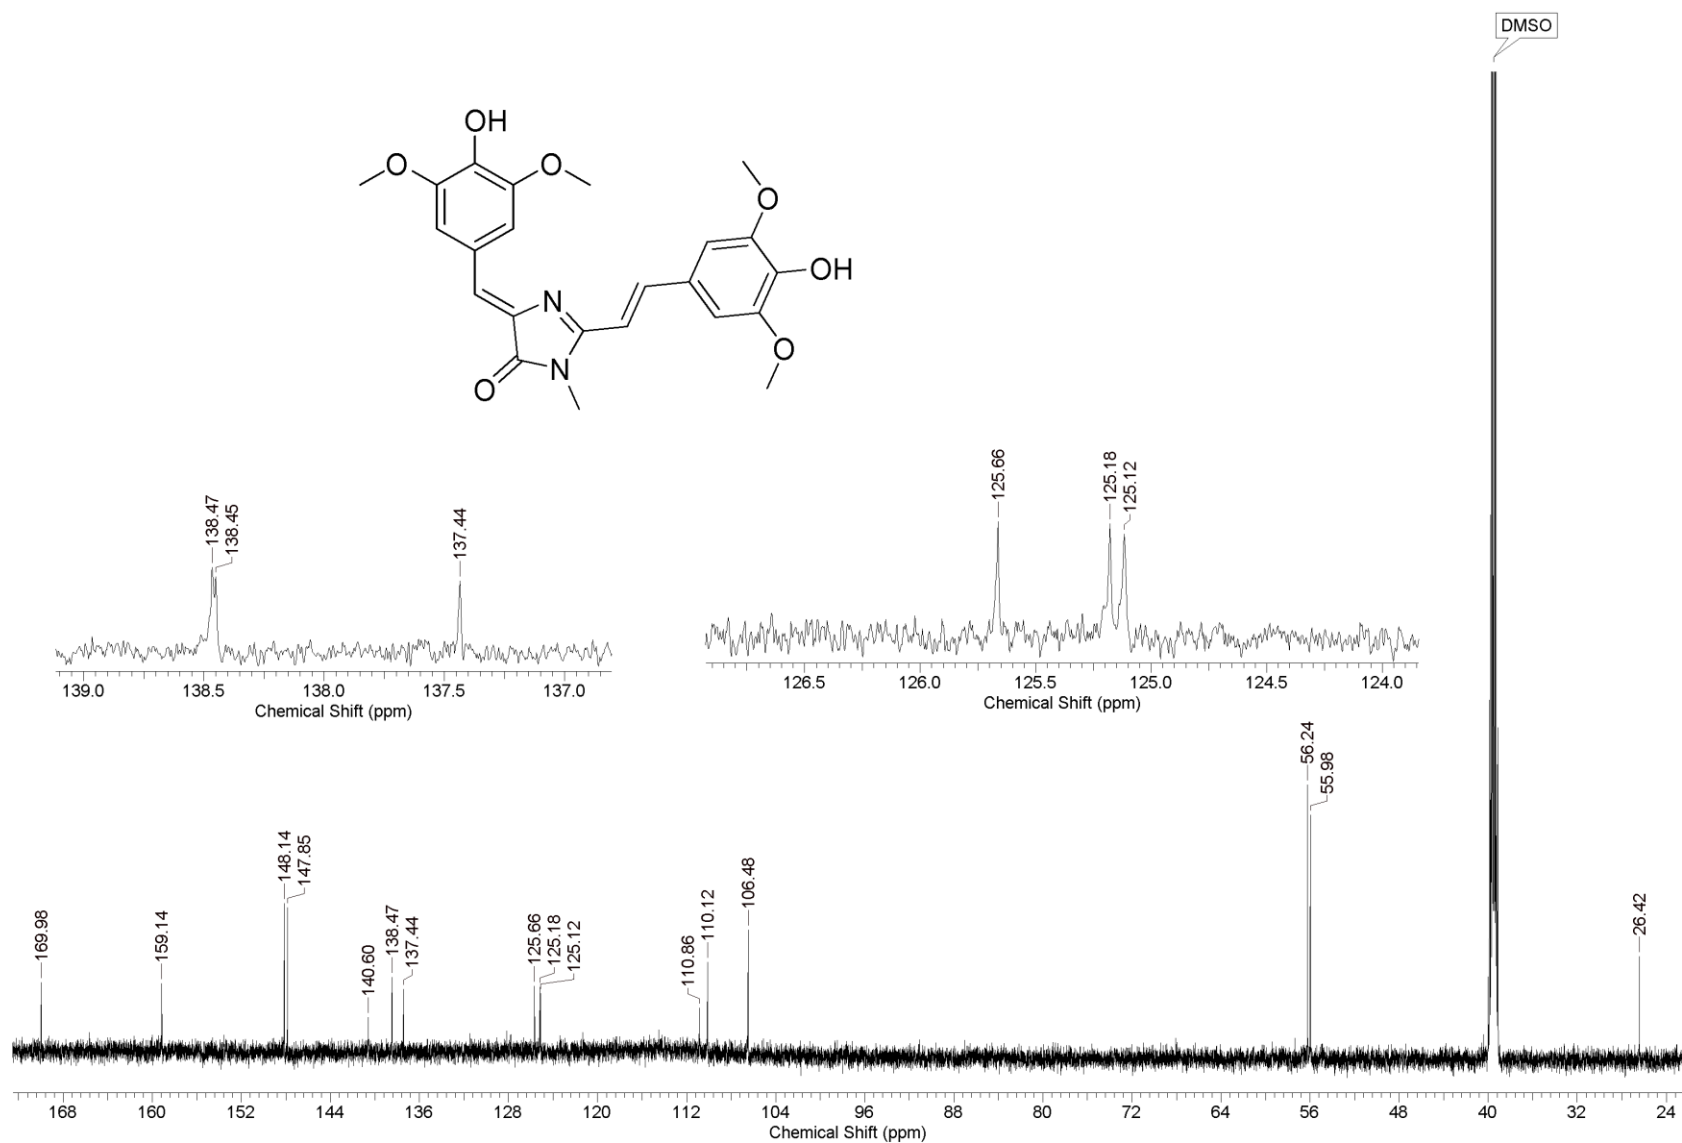





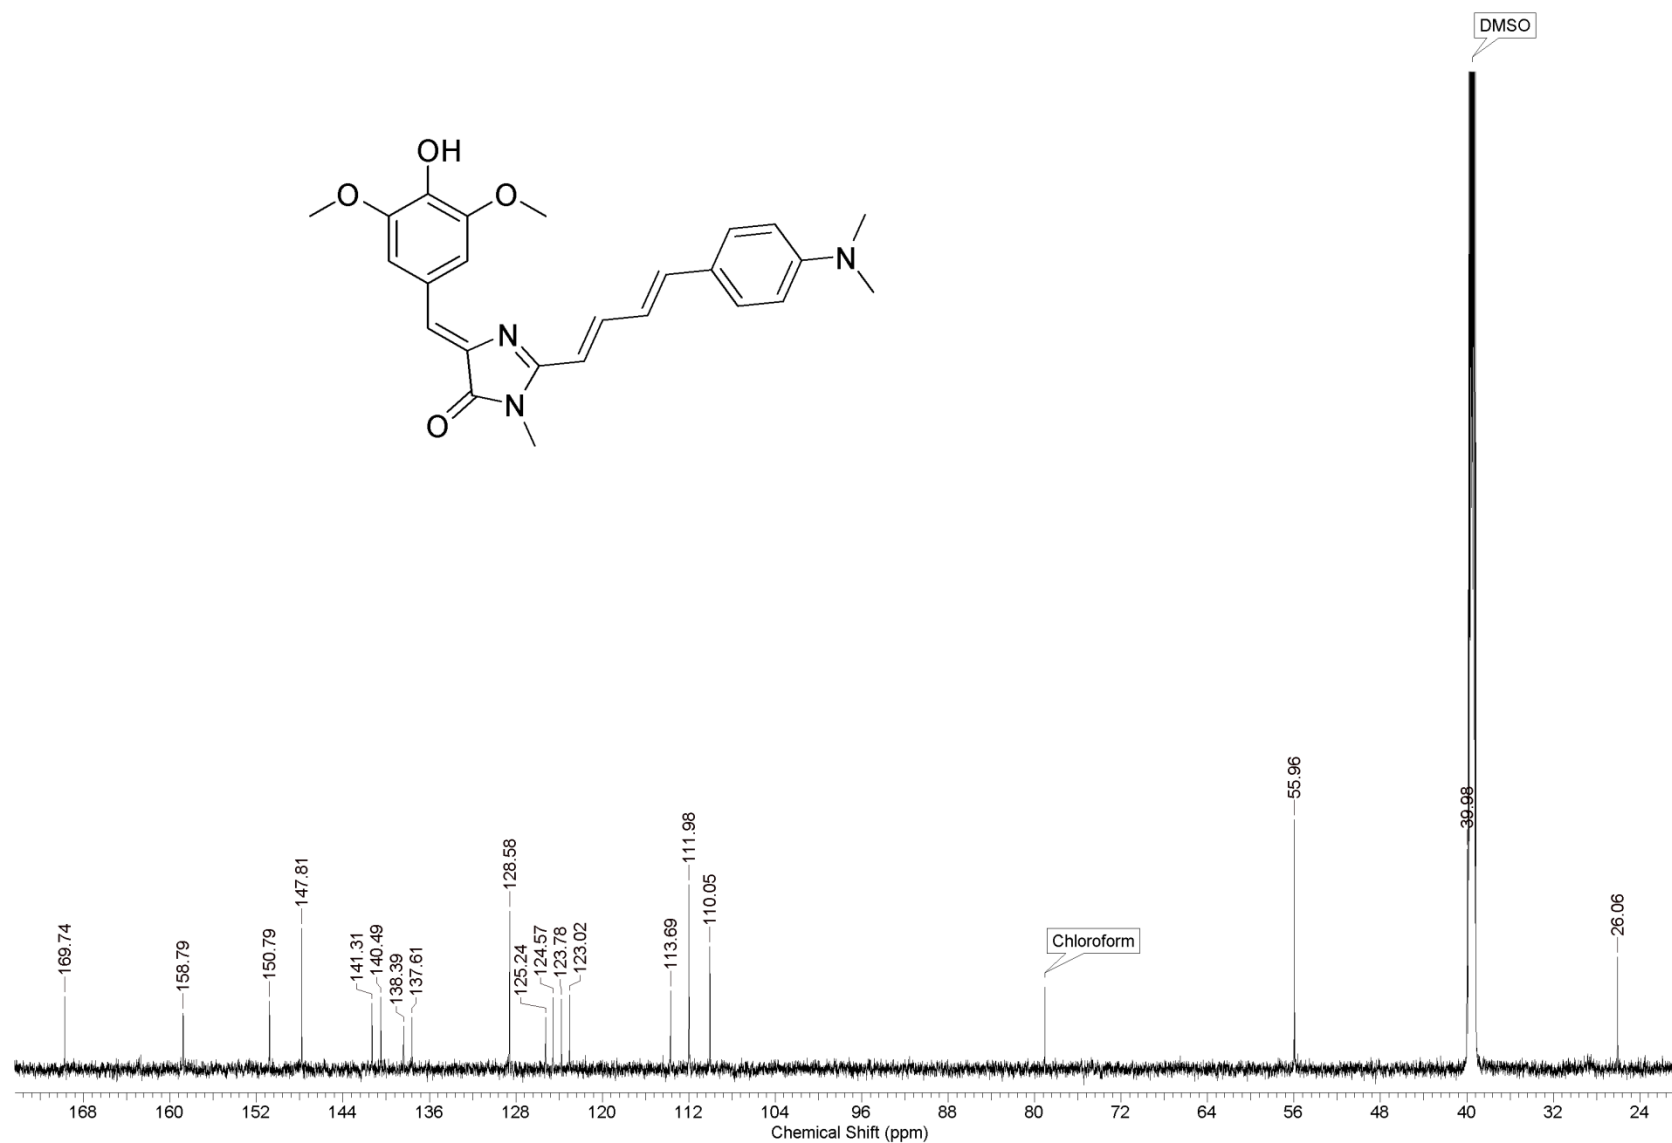



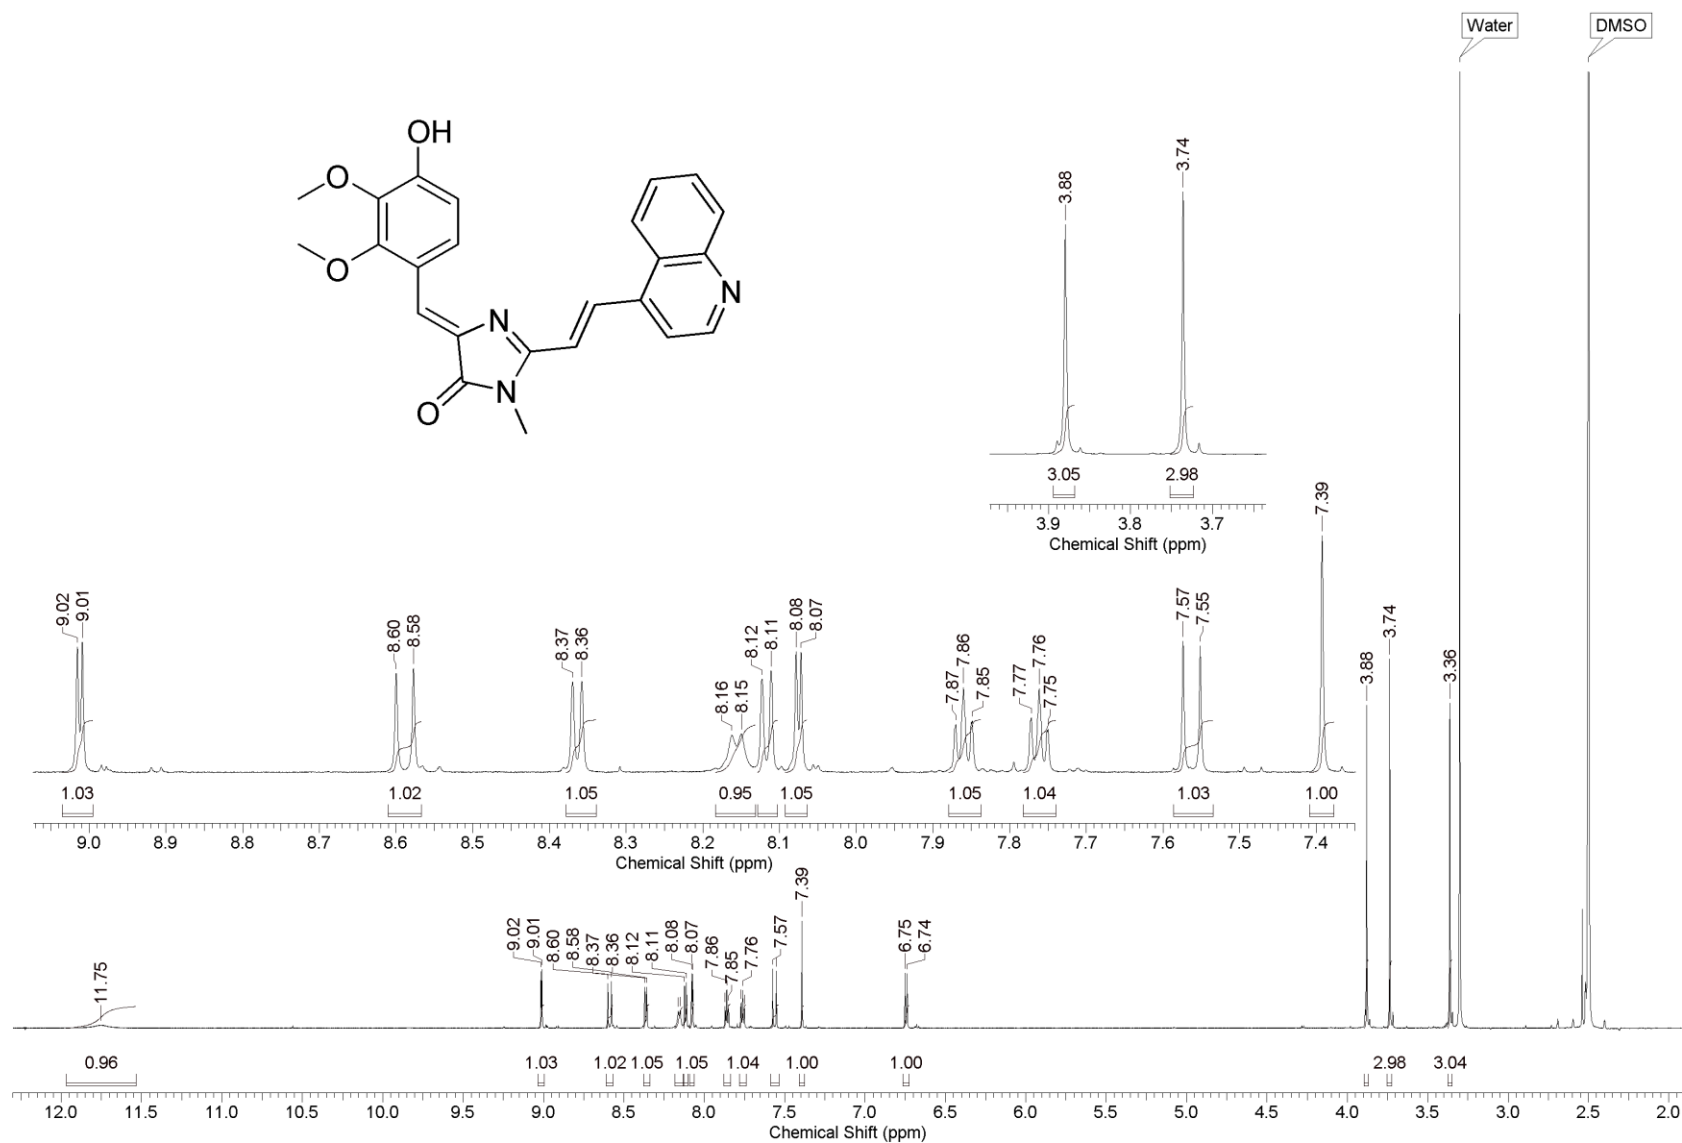

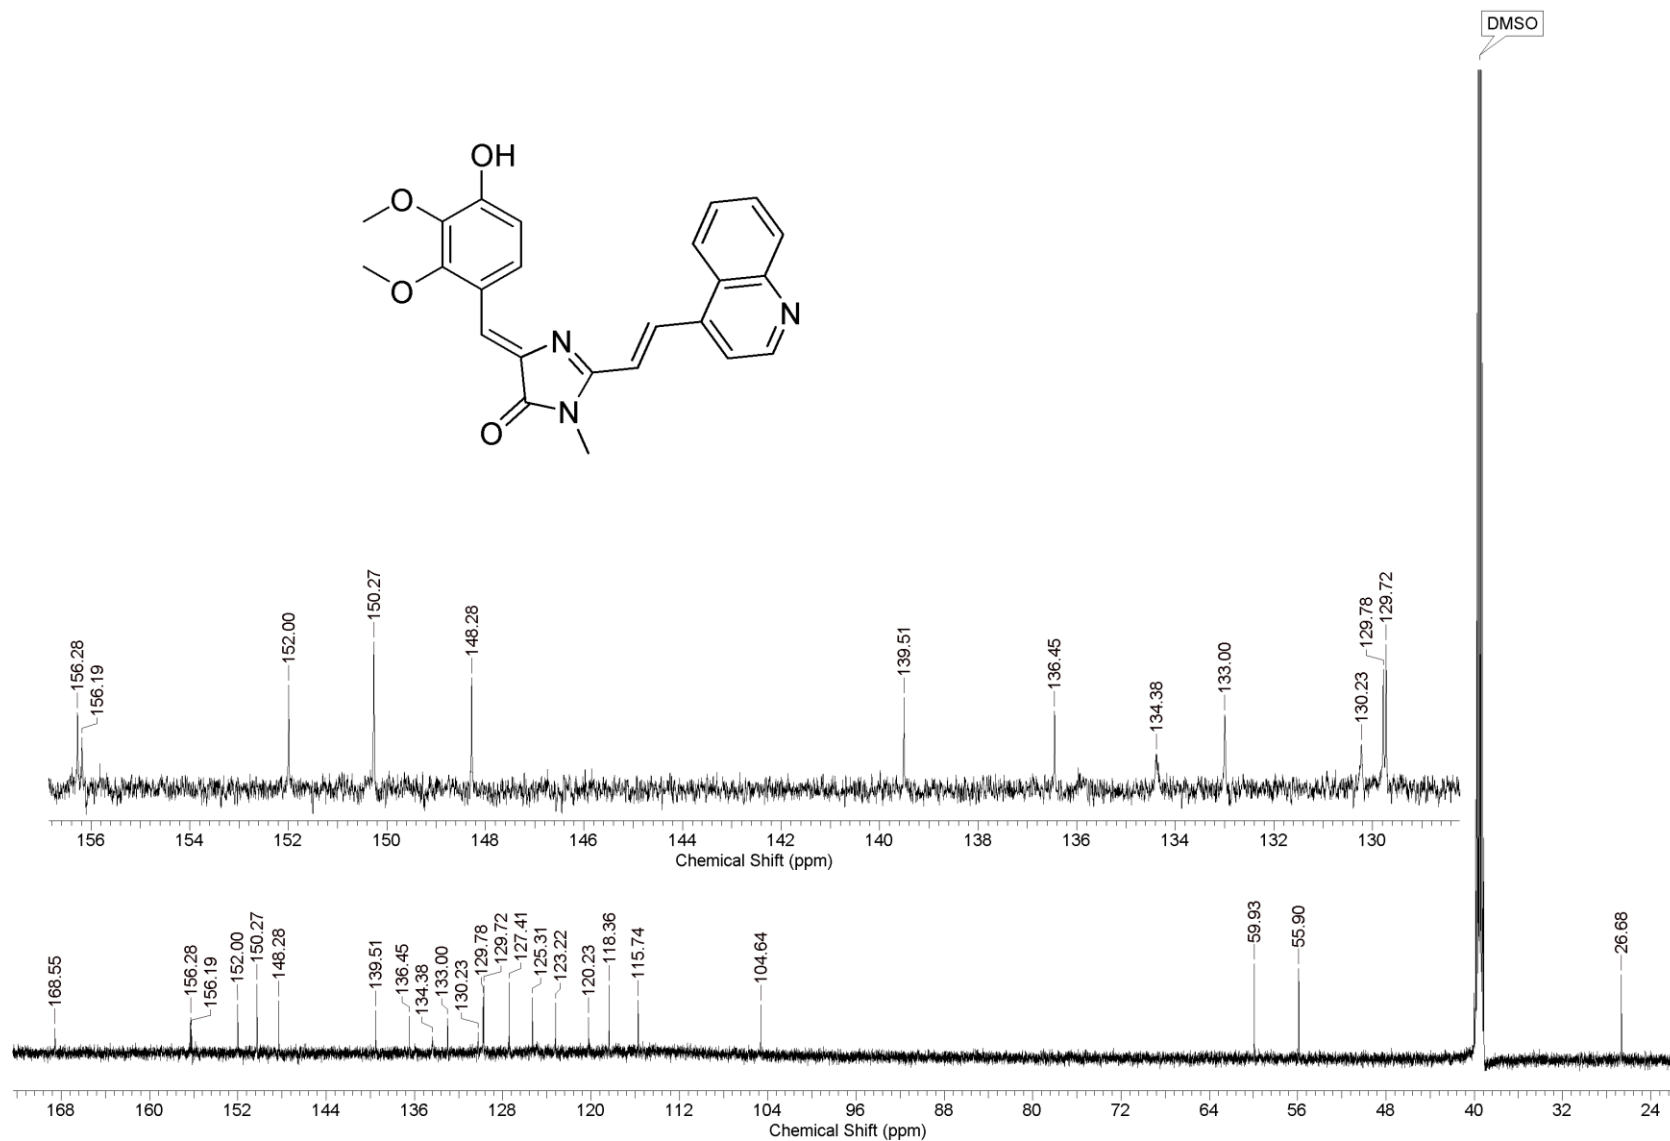

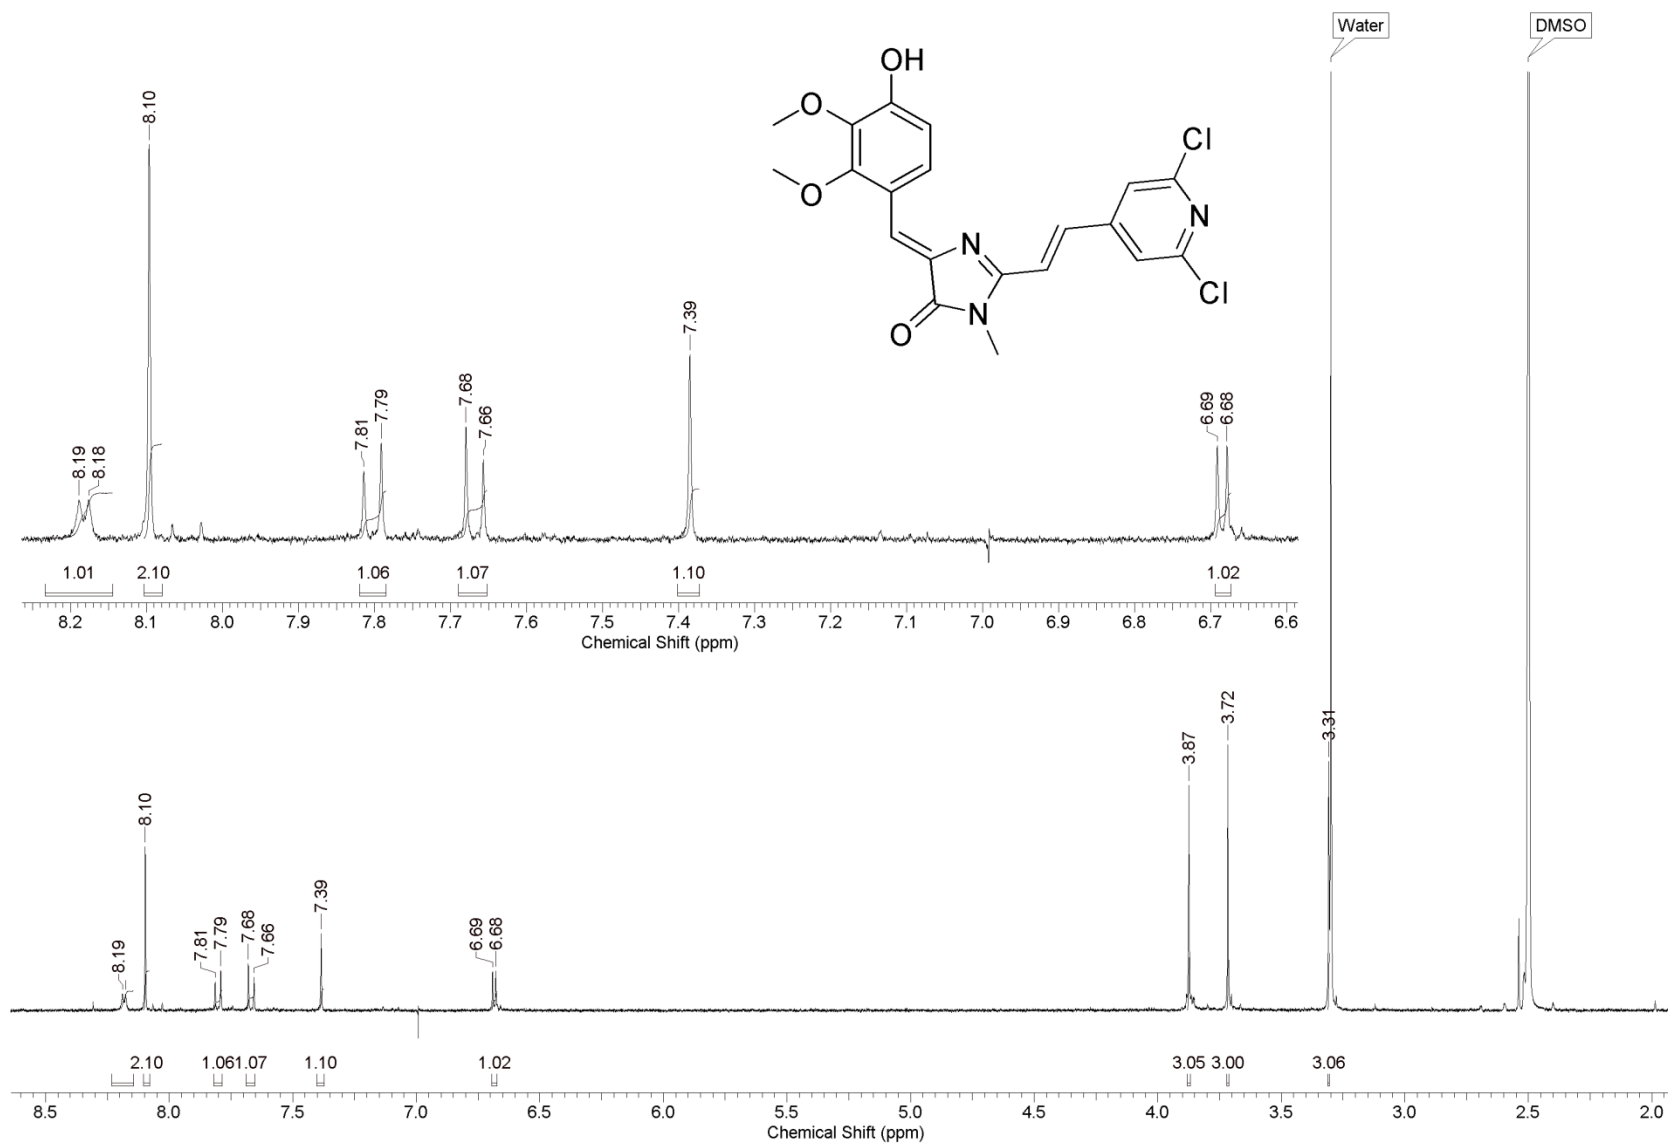

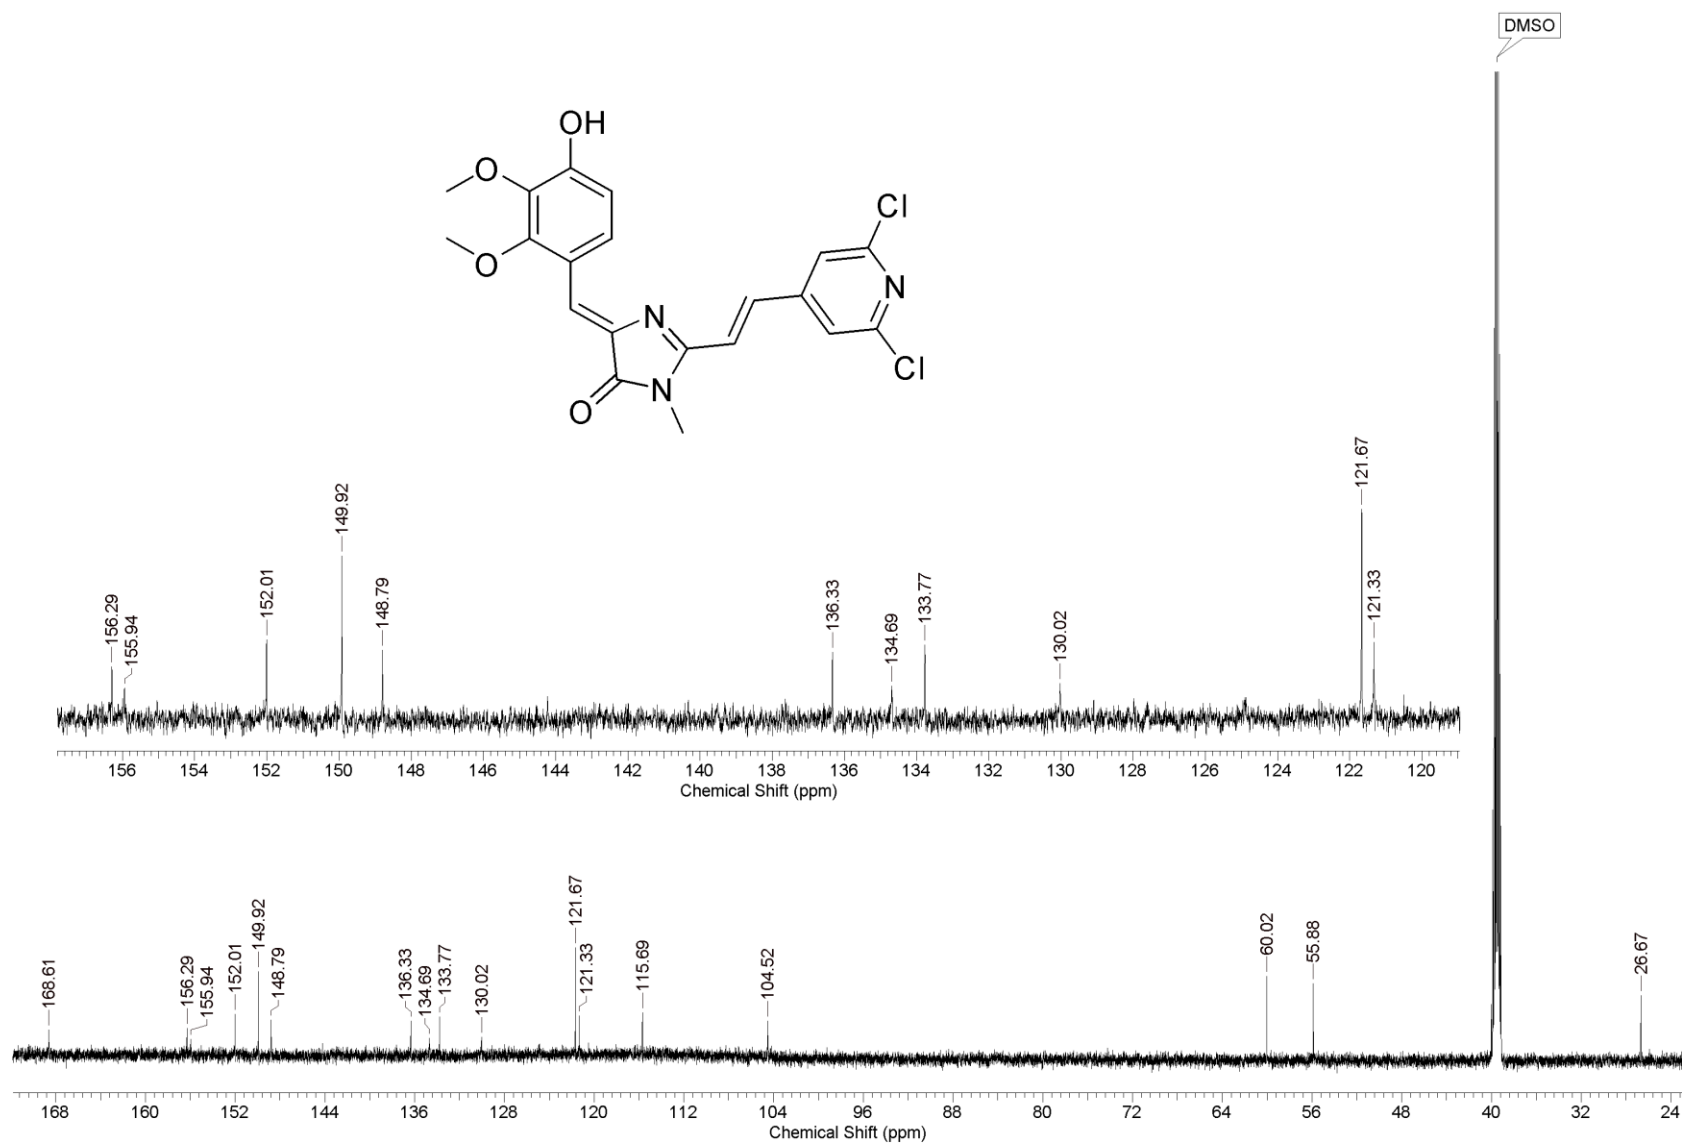

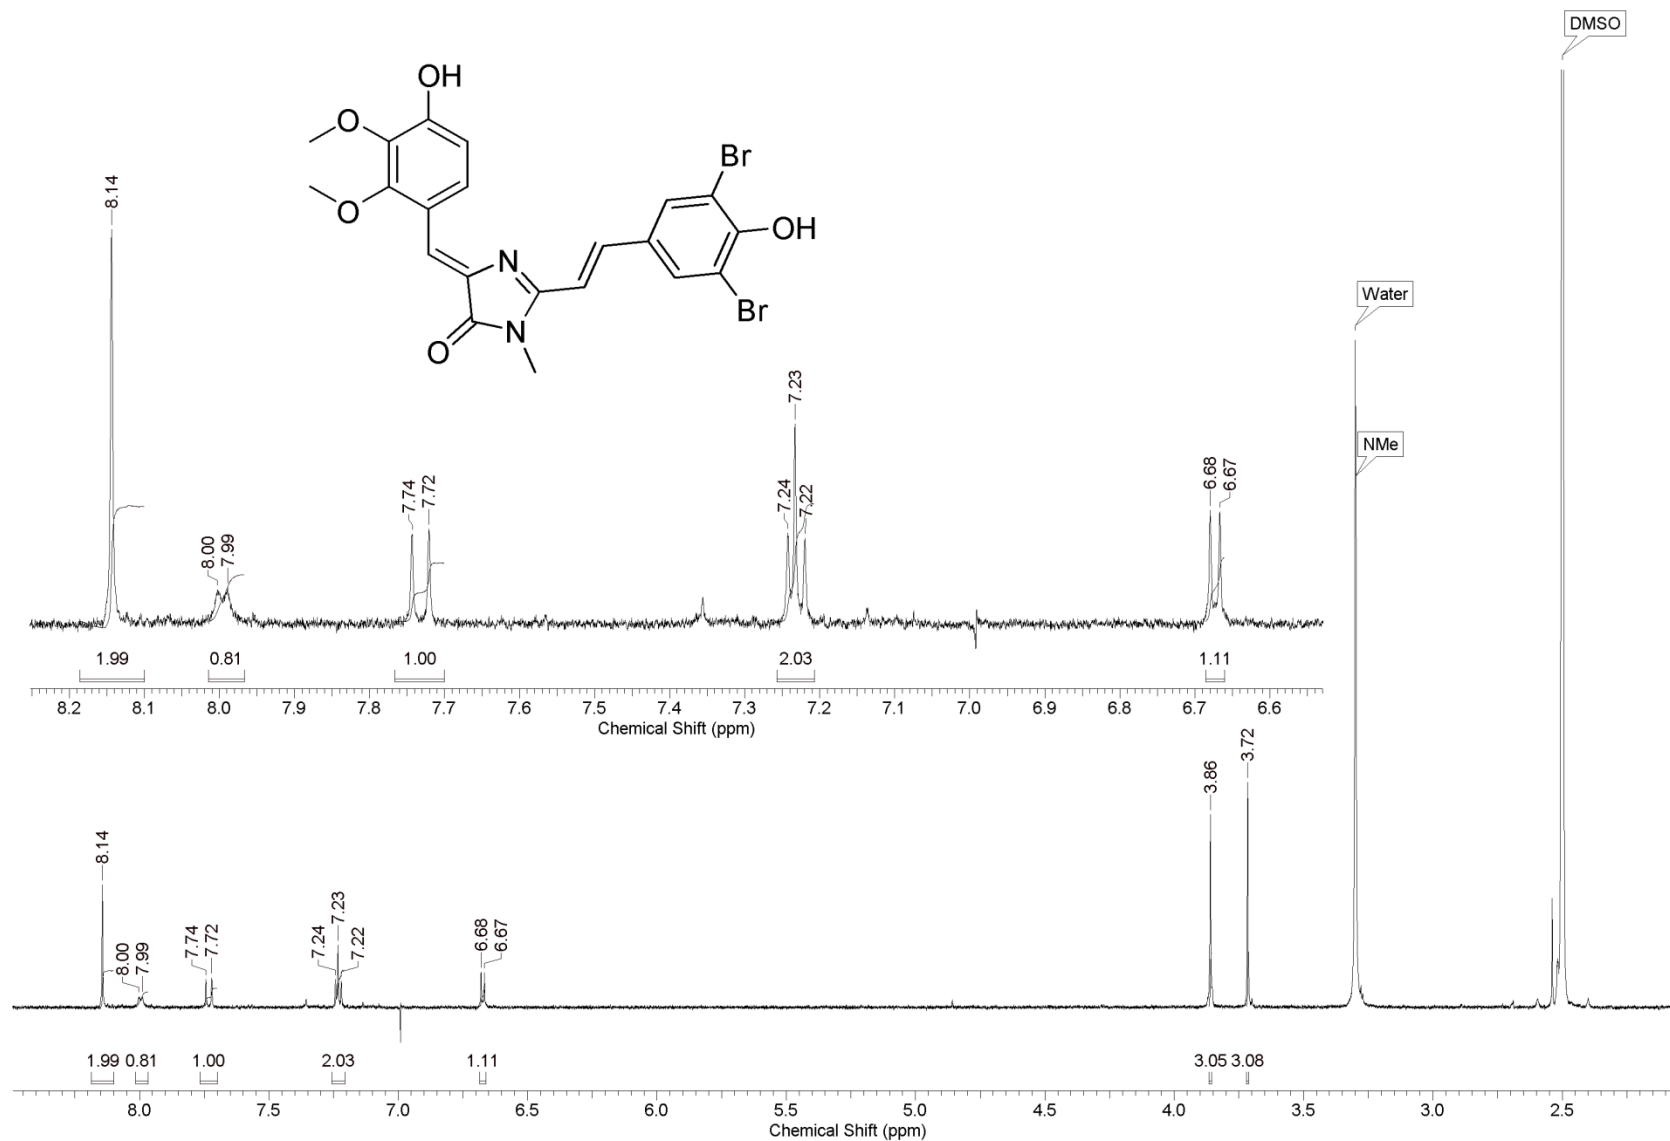



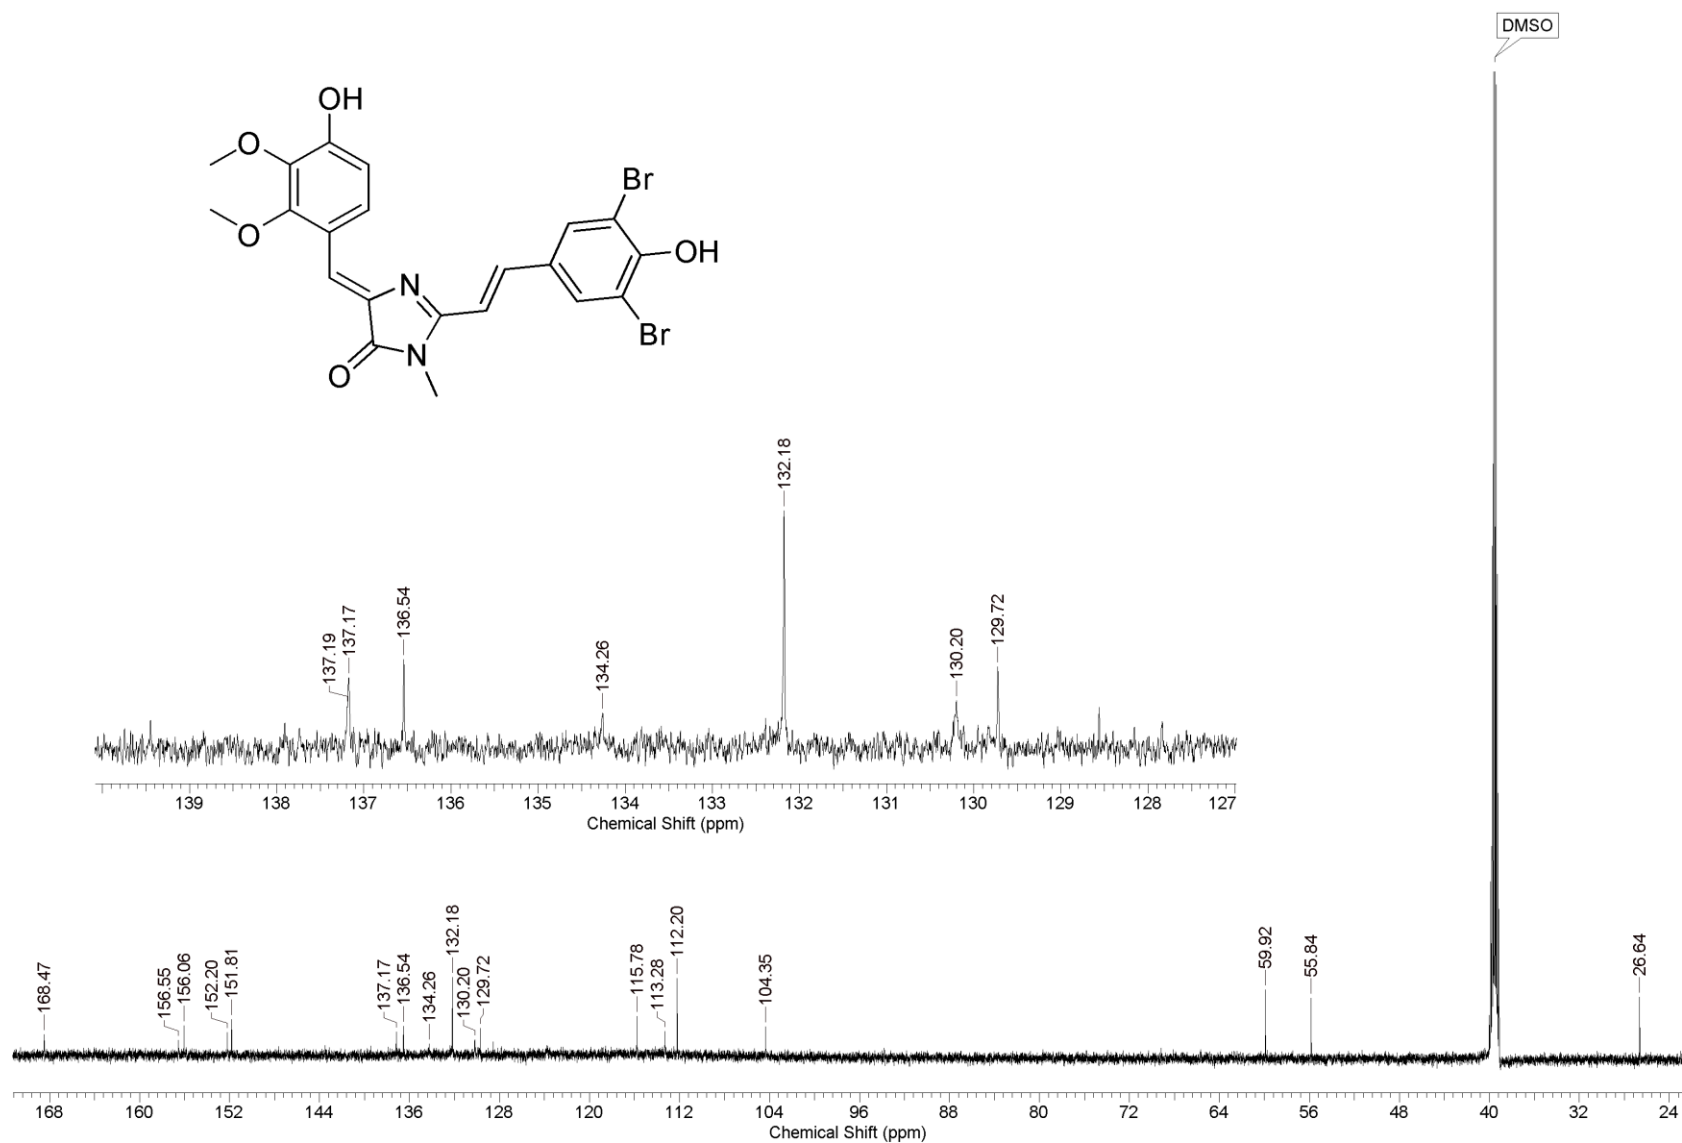

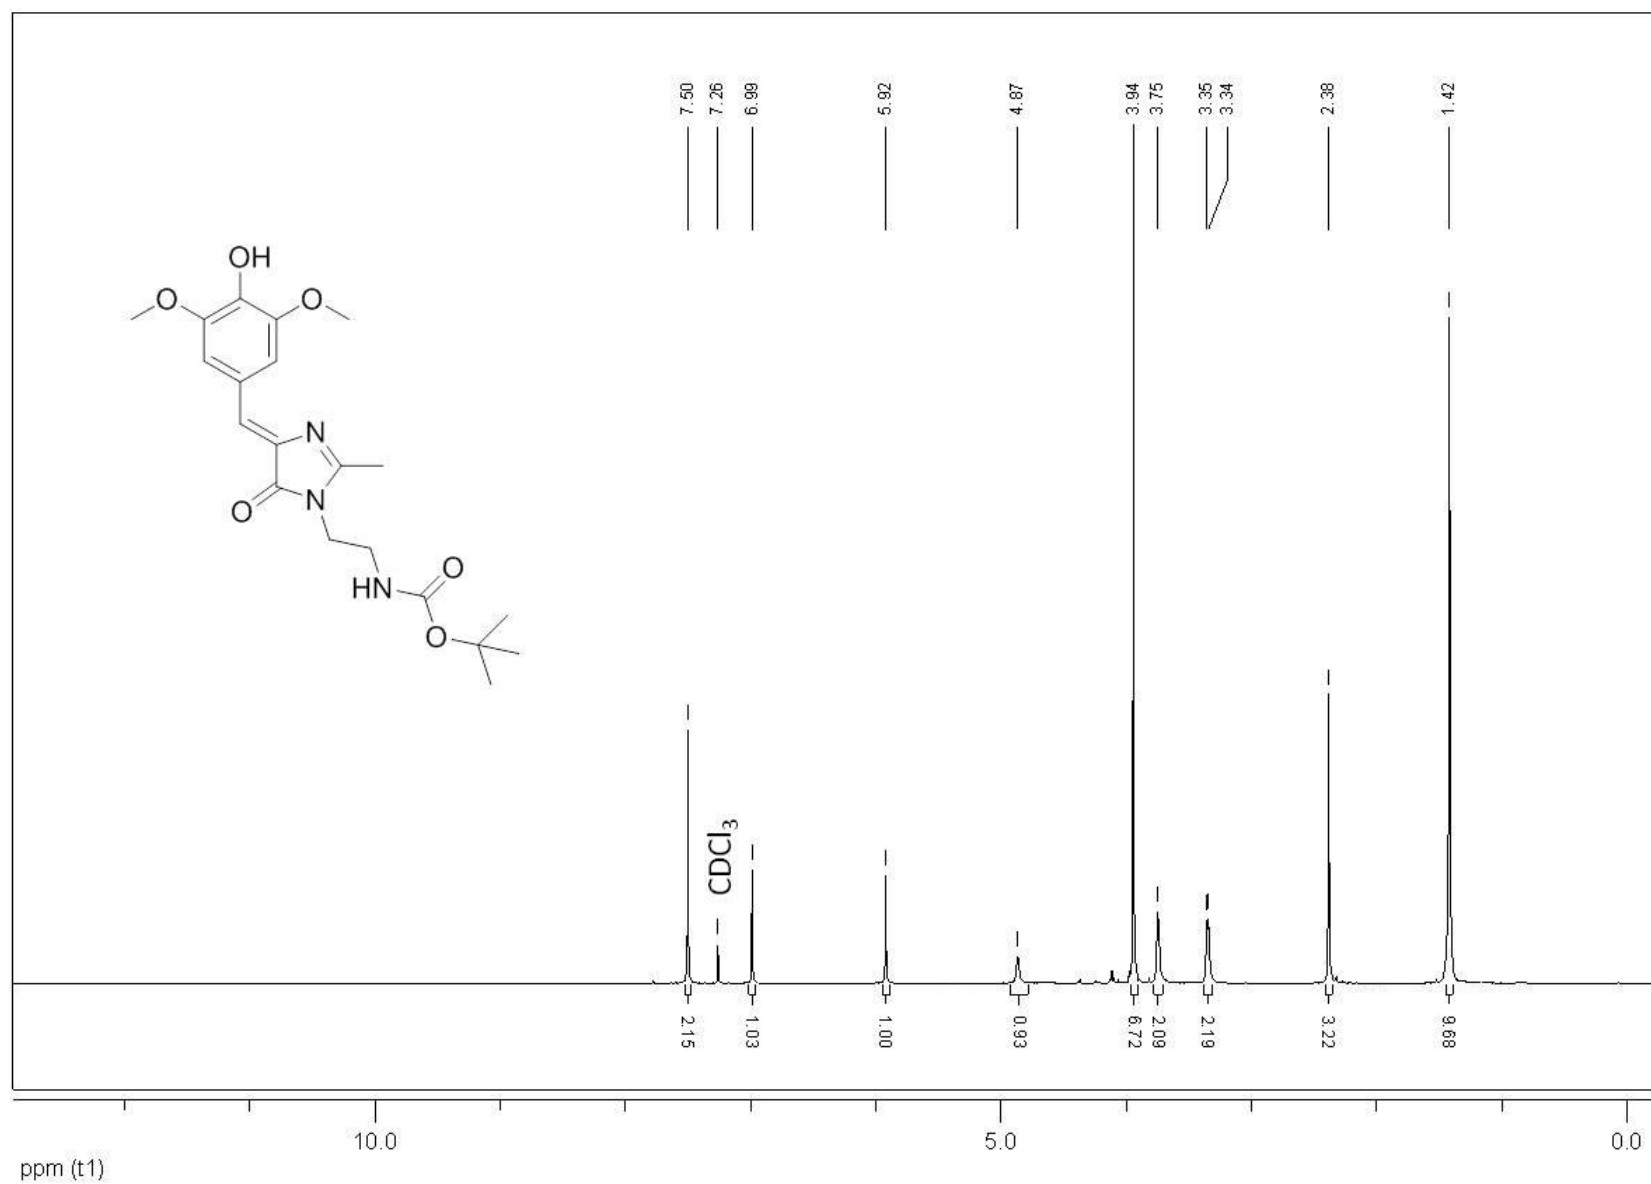

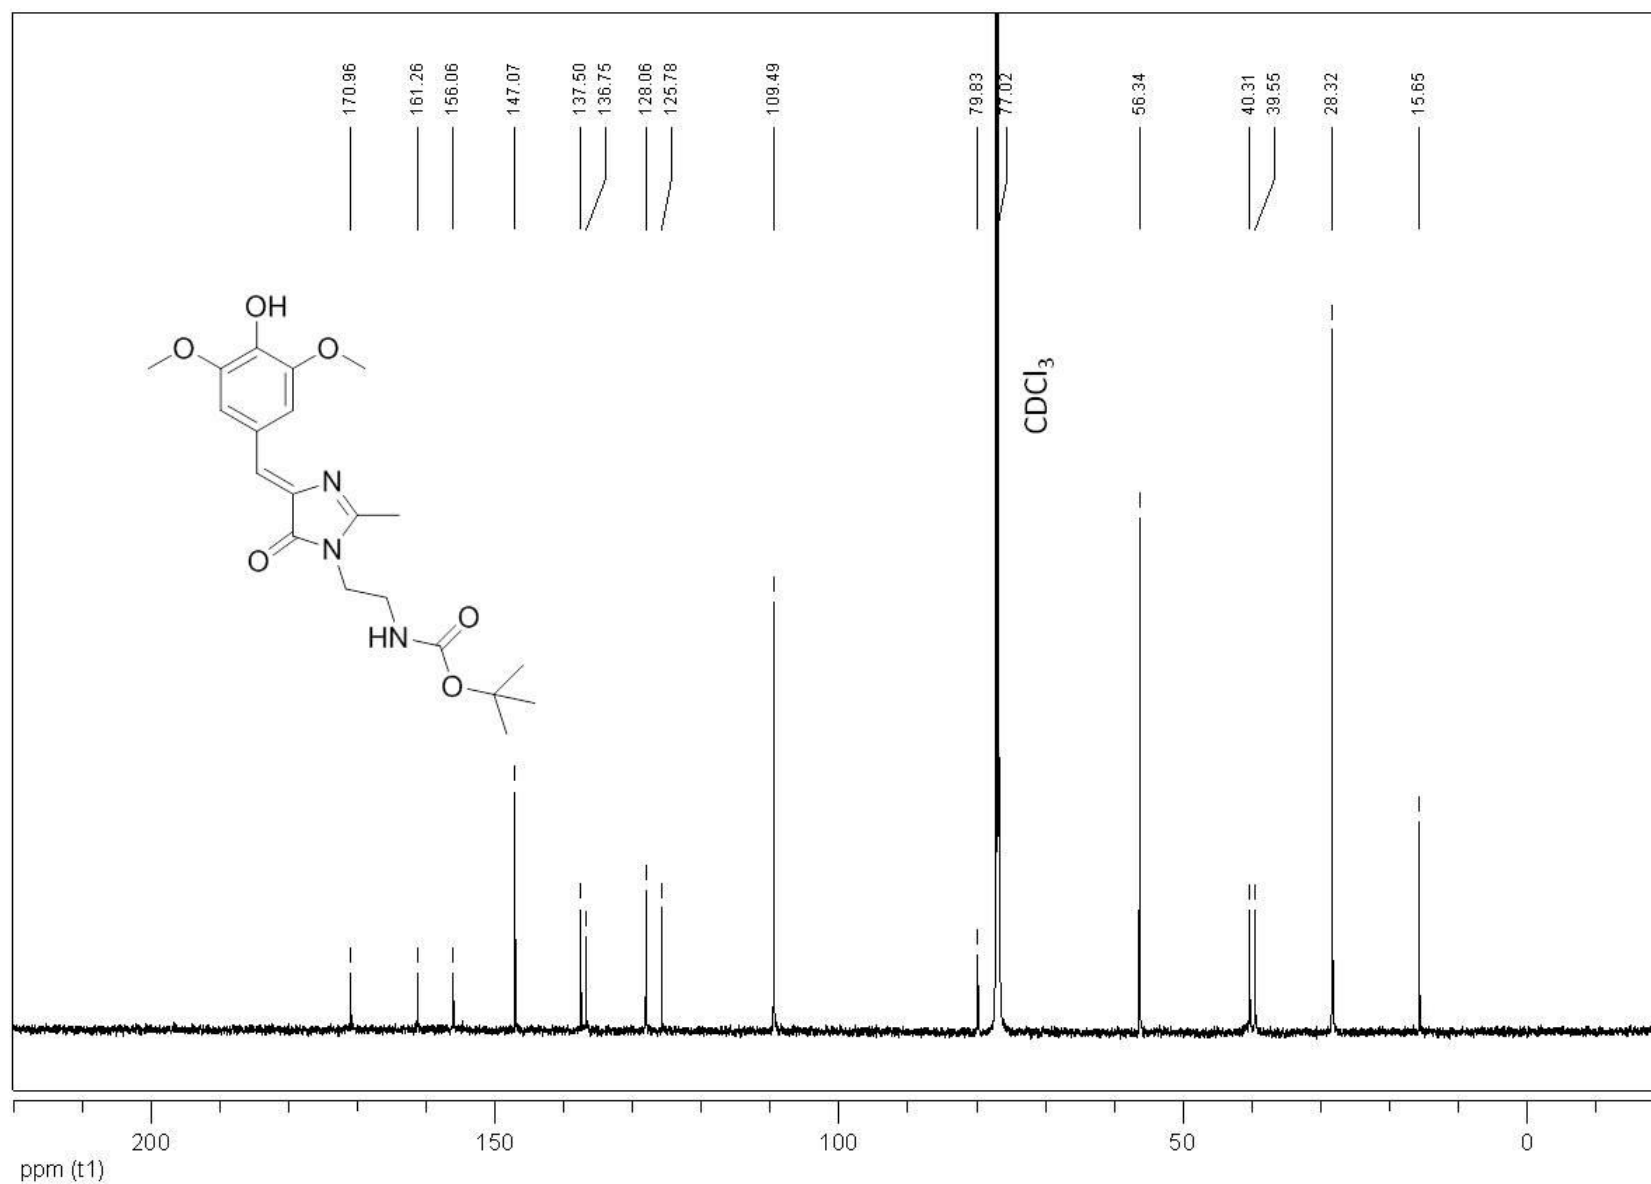

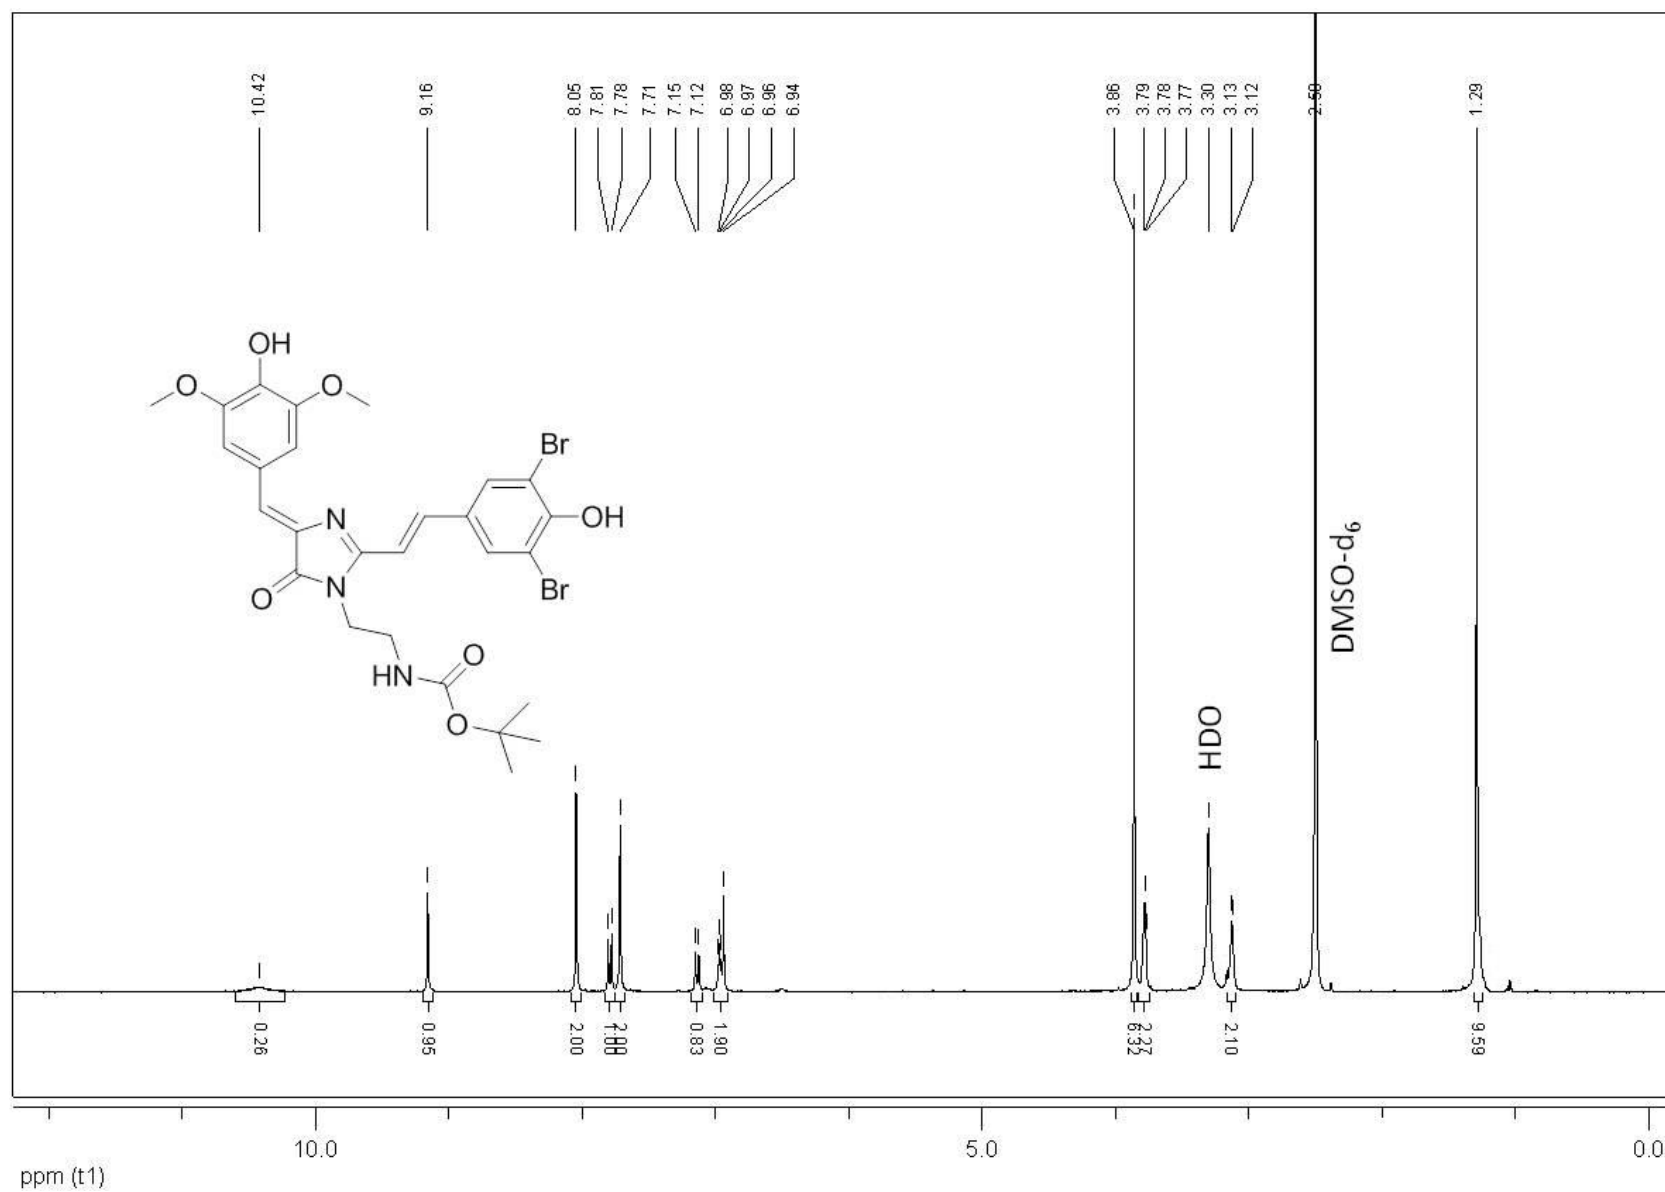

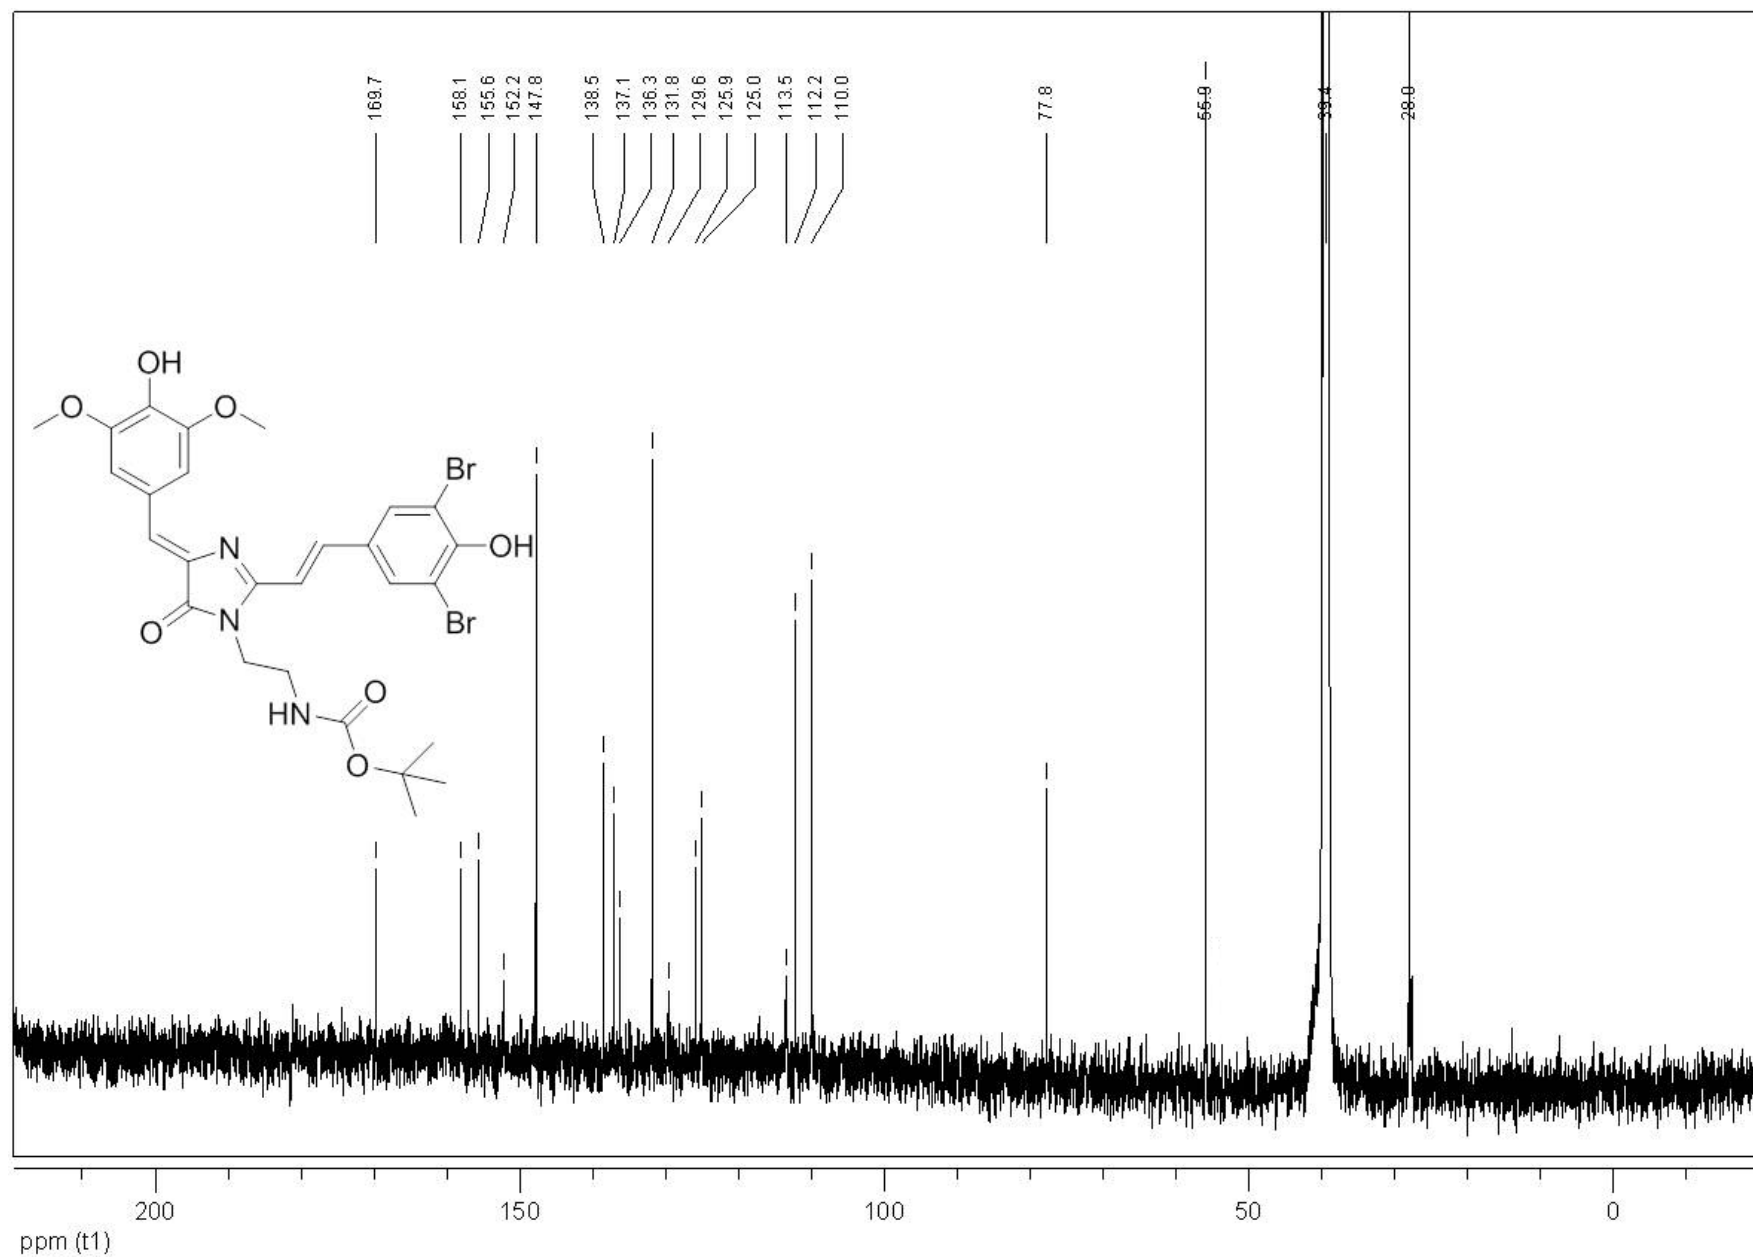

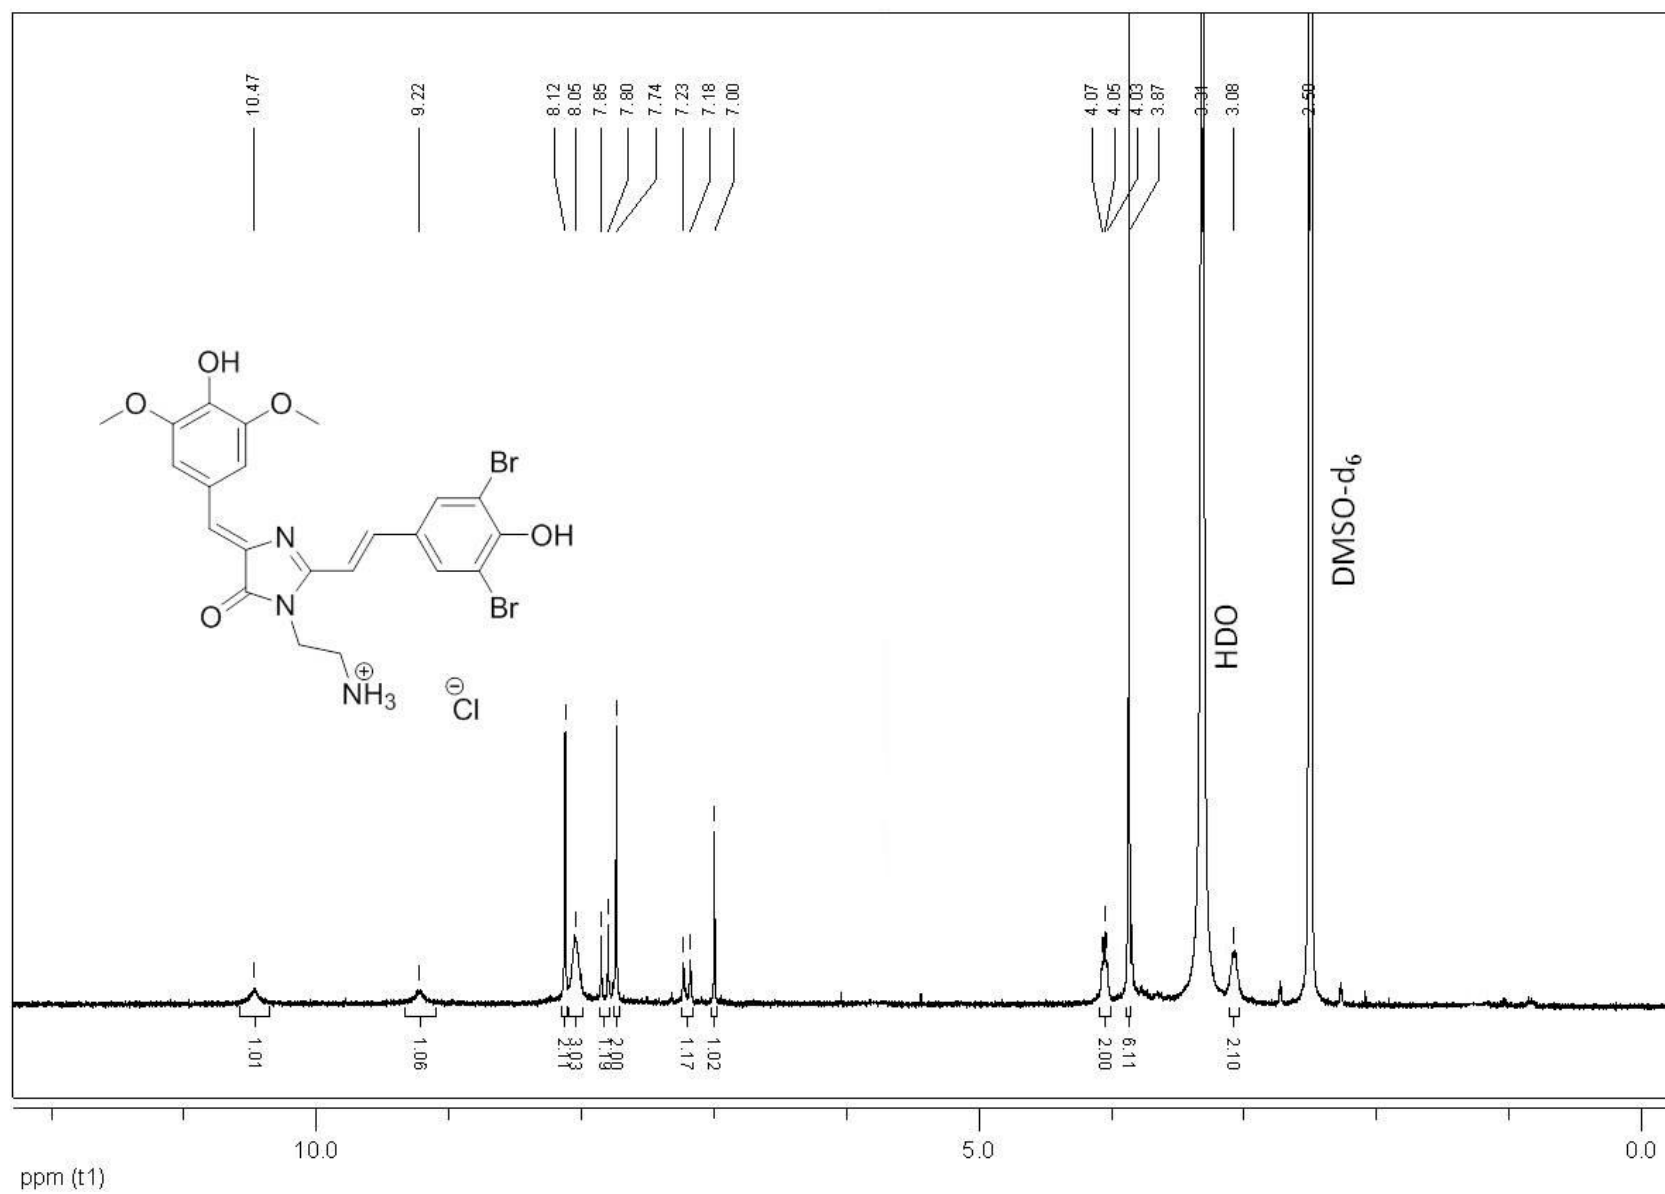

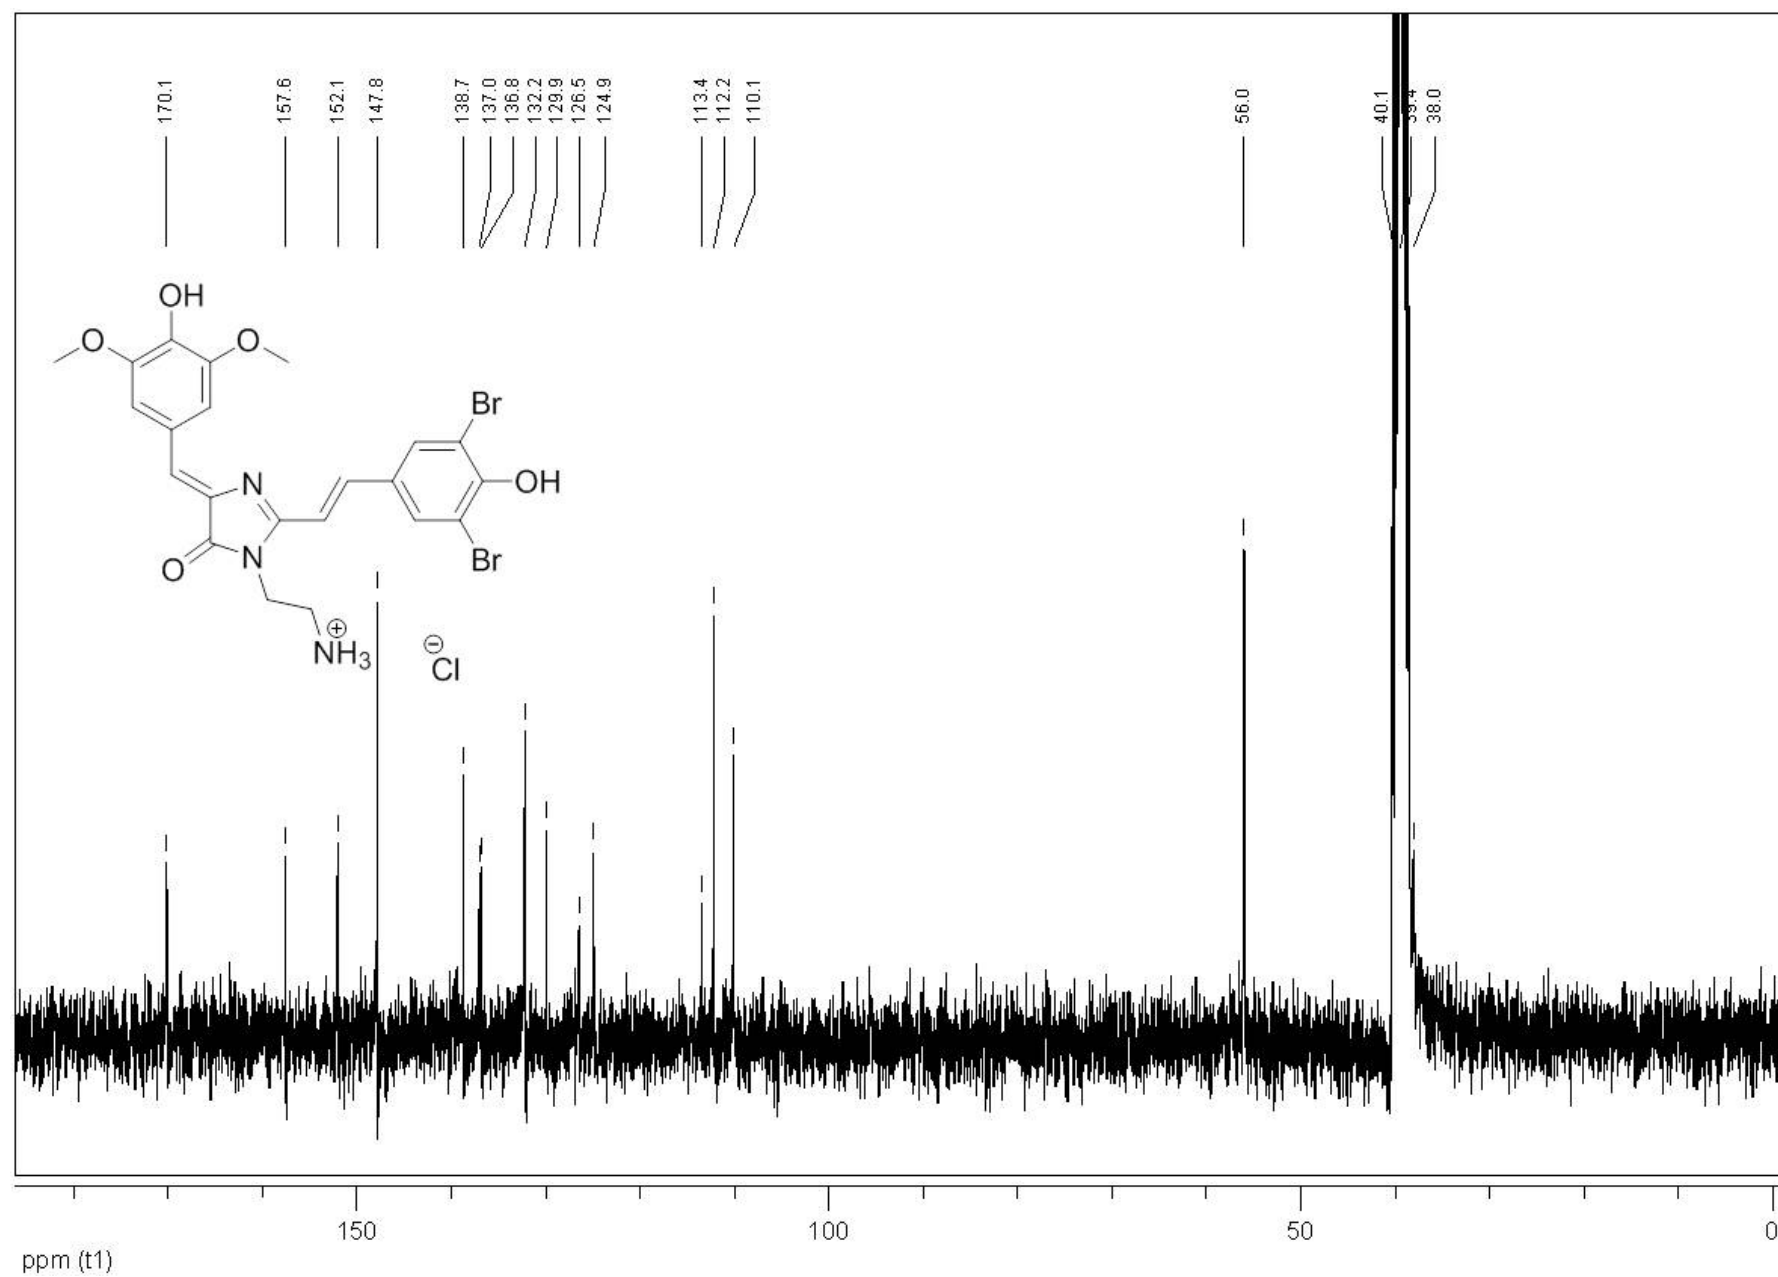

[Back to Contents](#)

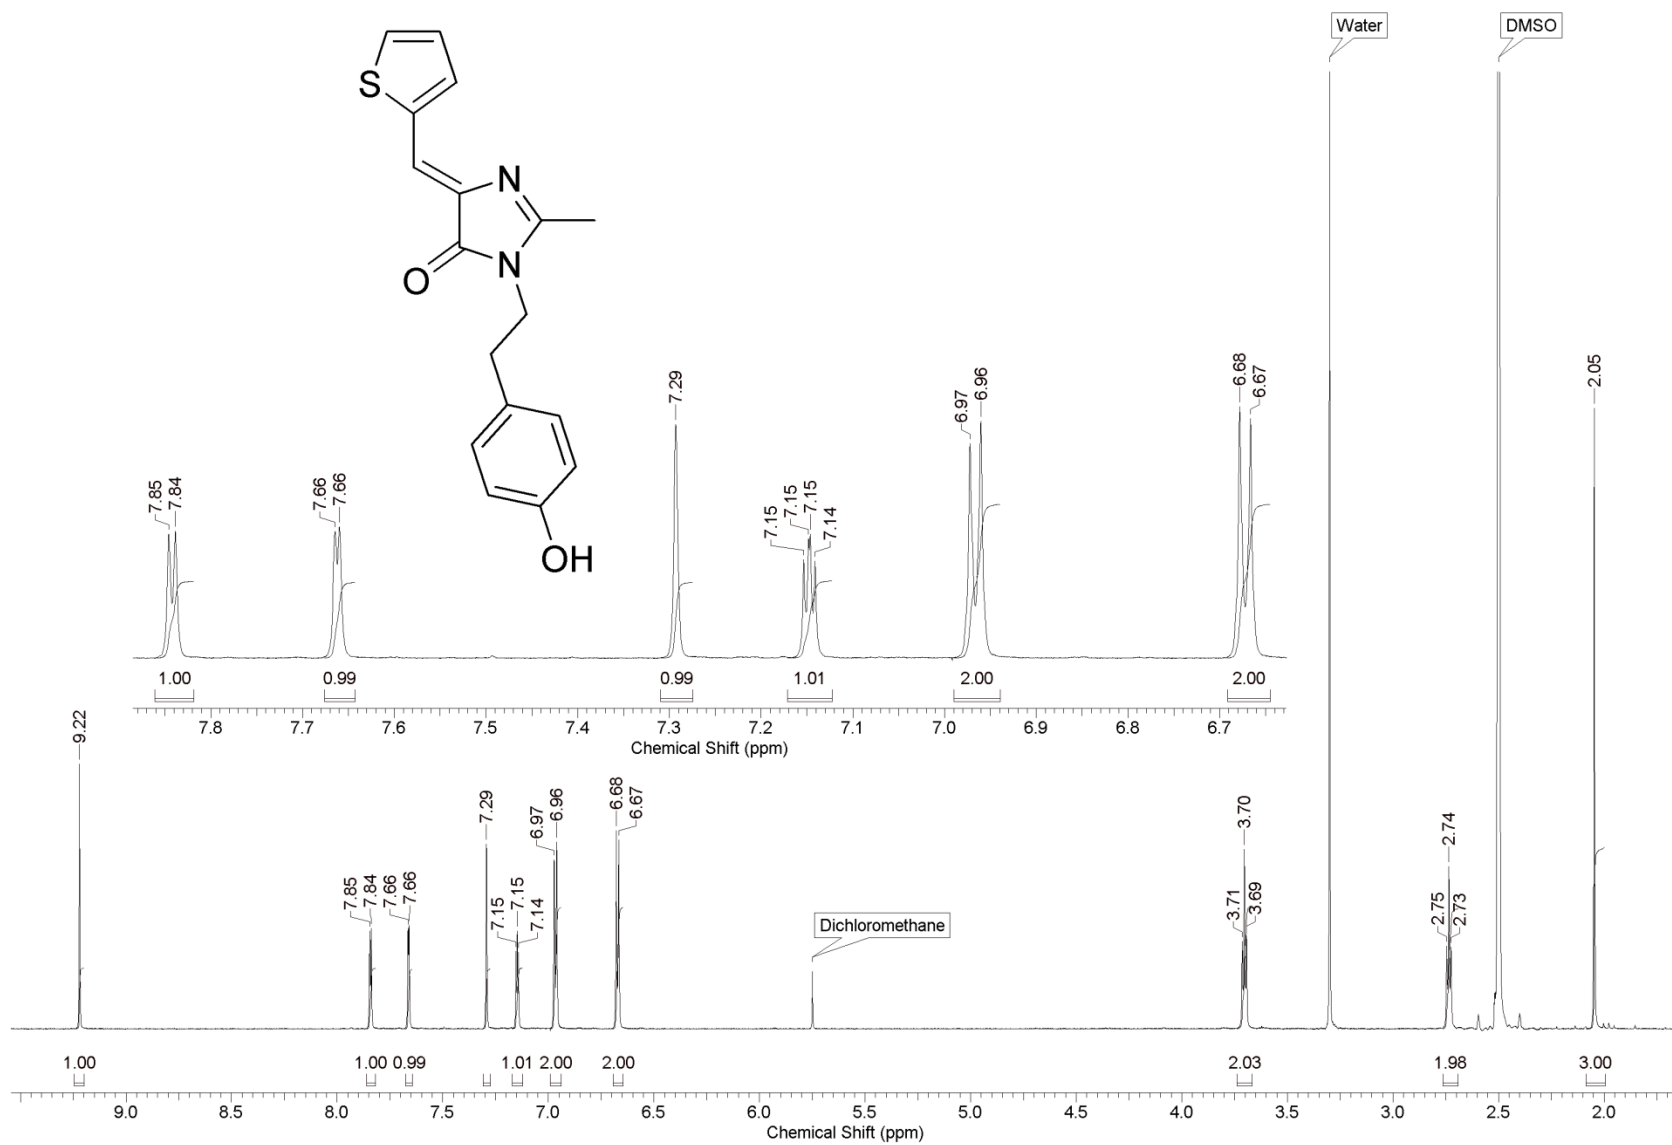



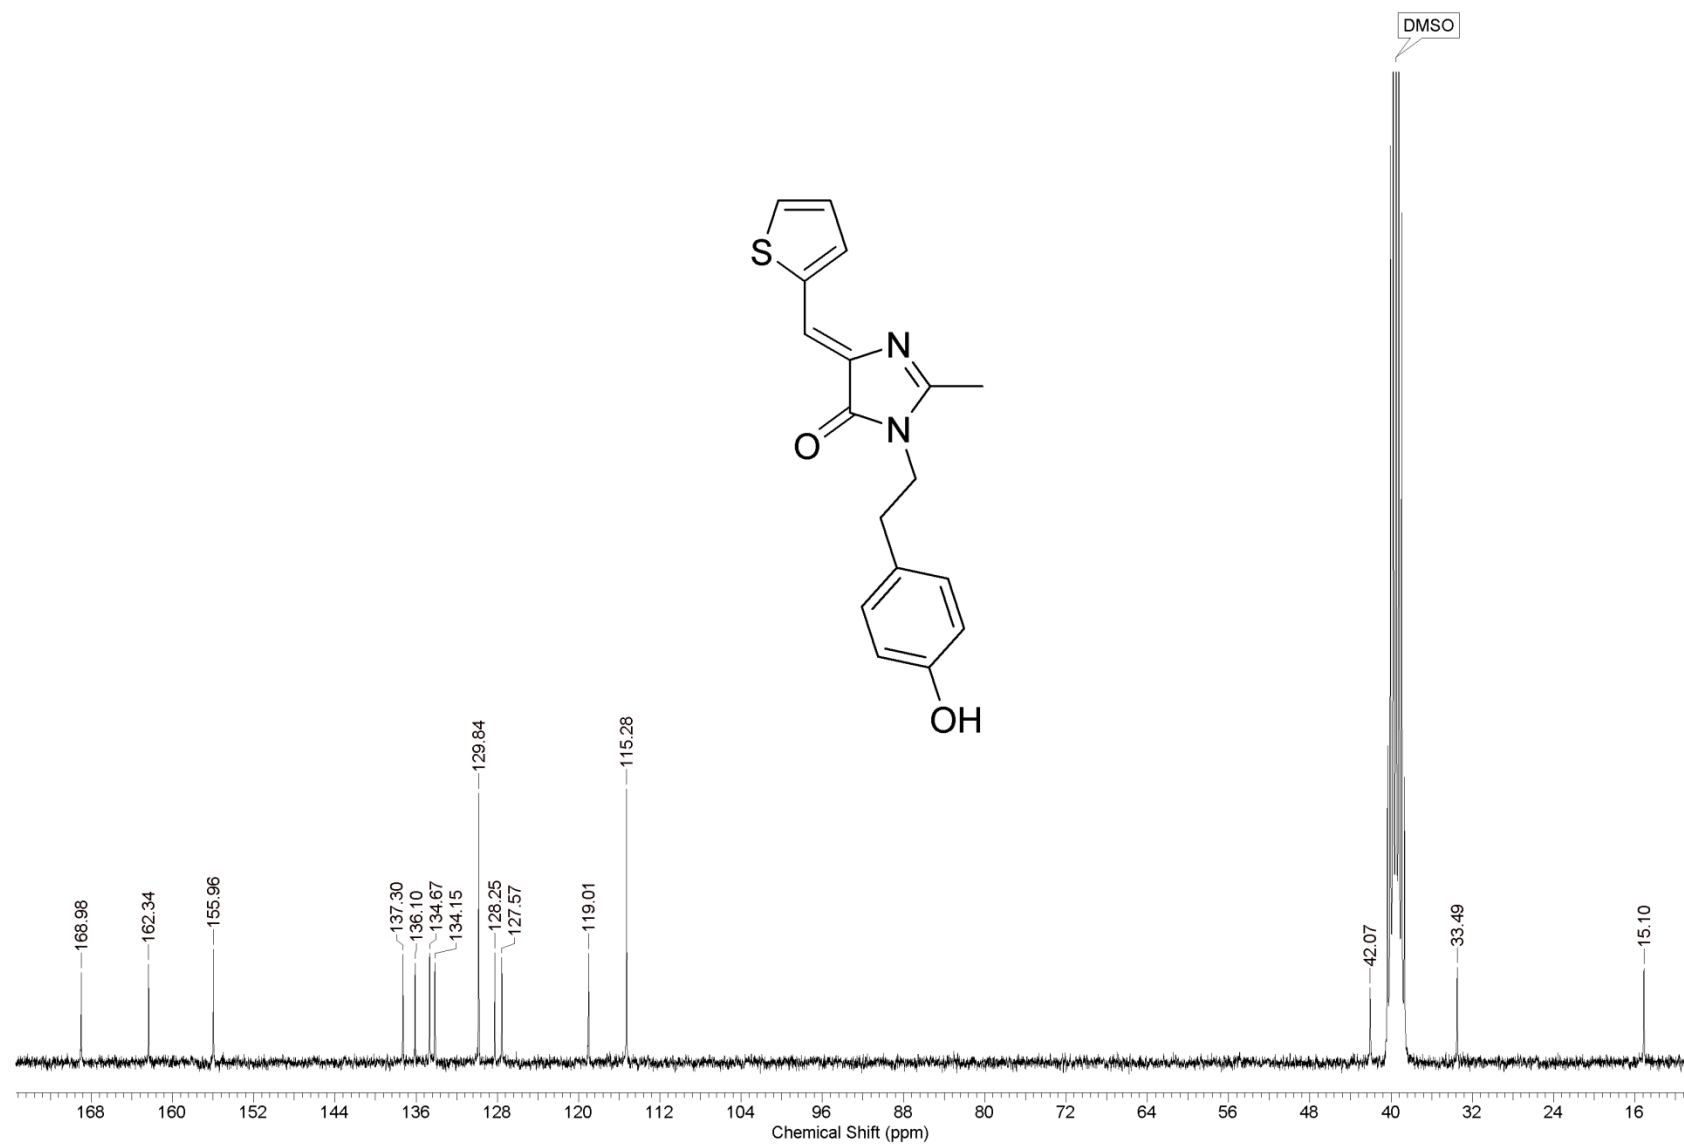

[Back to Contents](#)

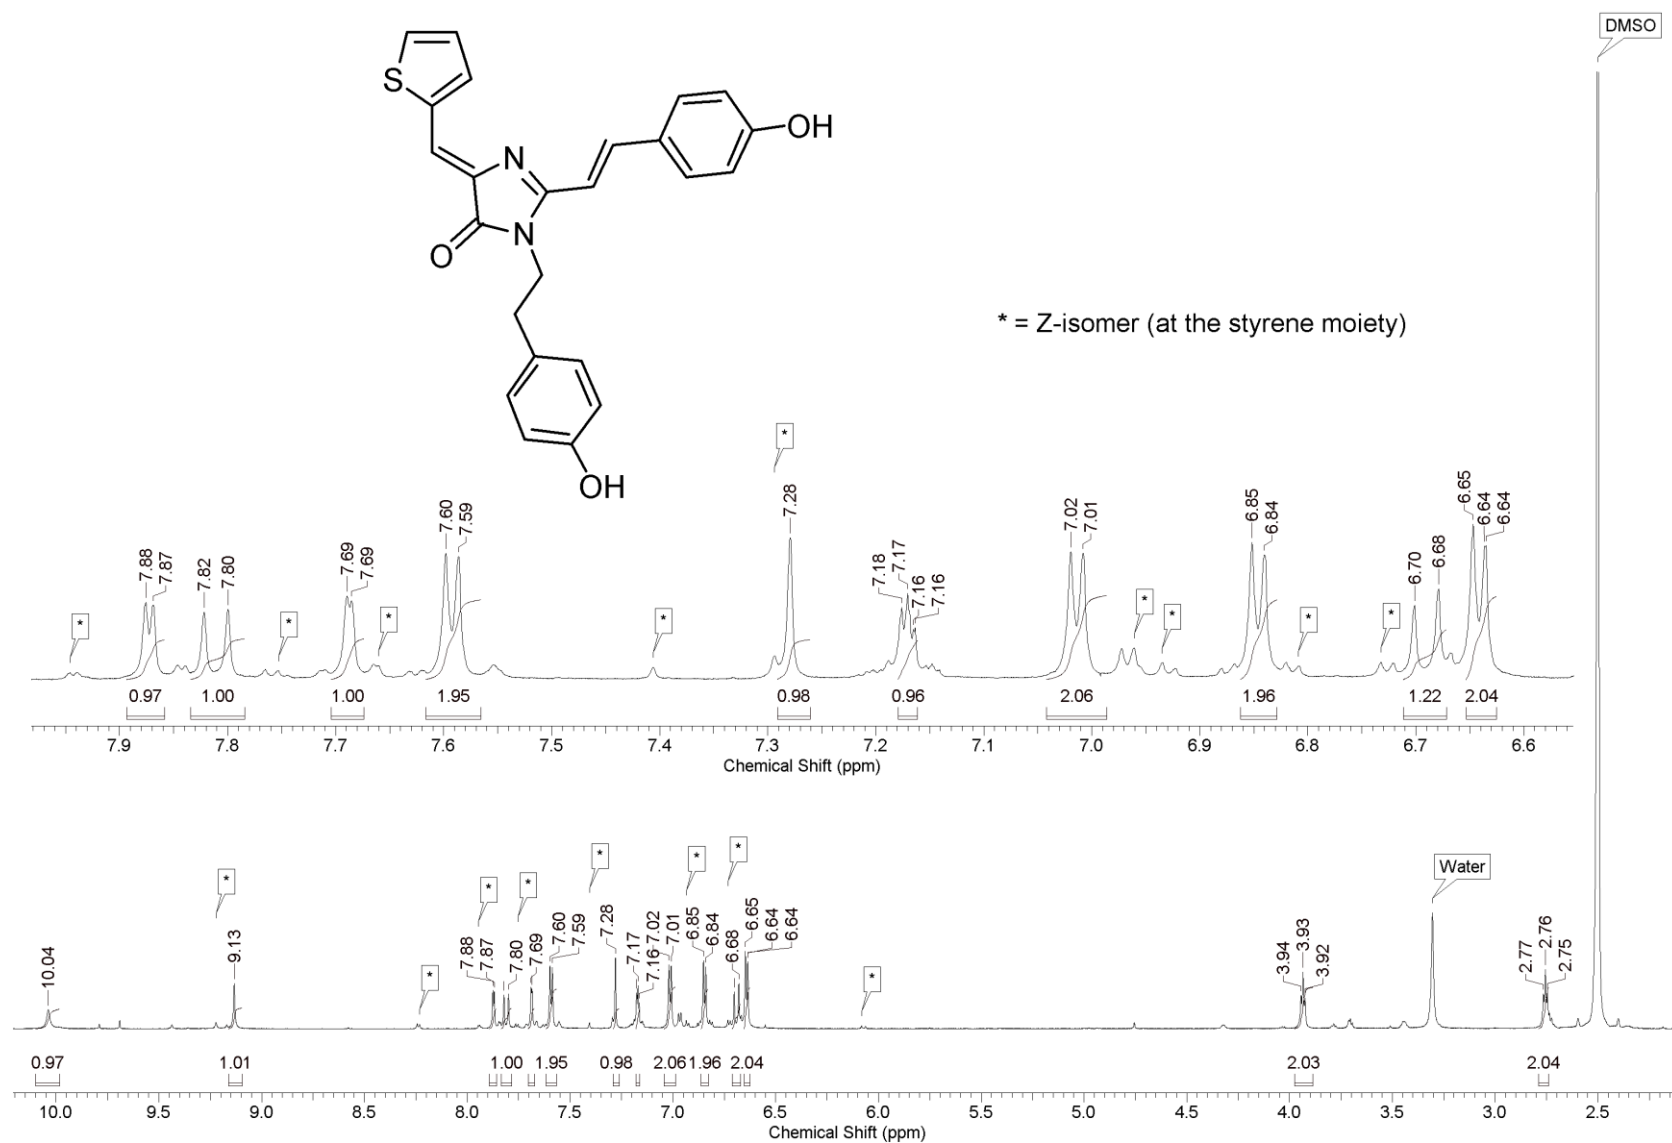

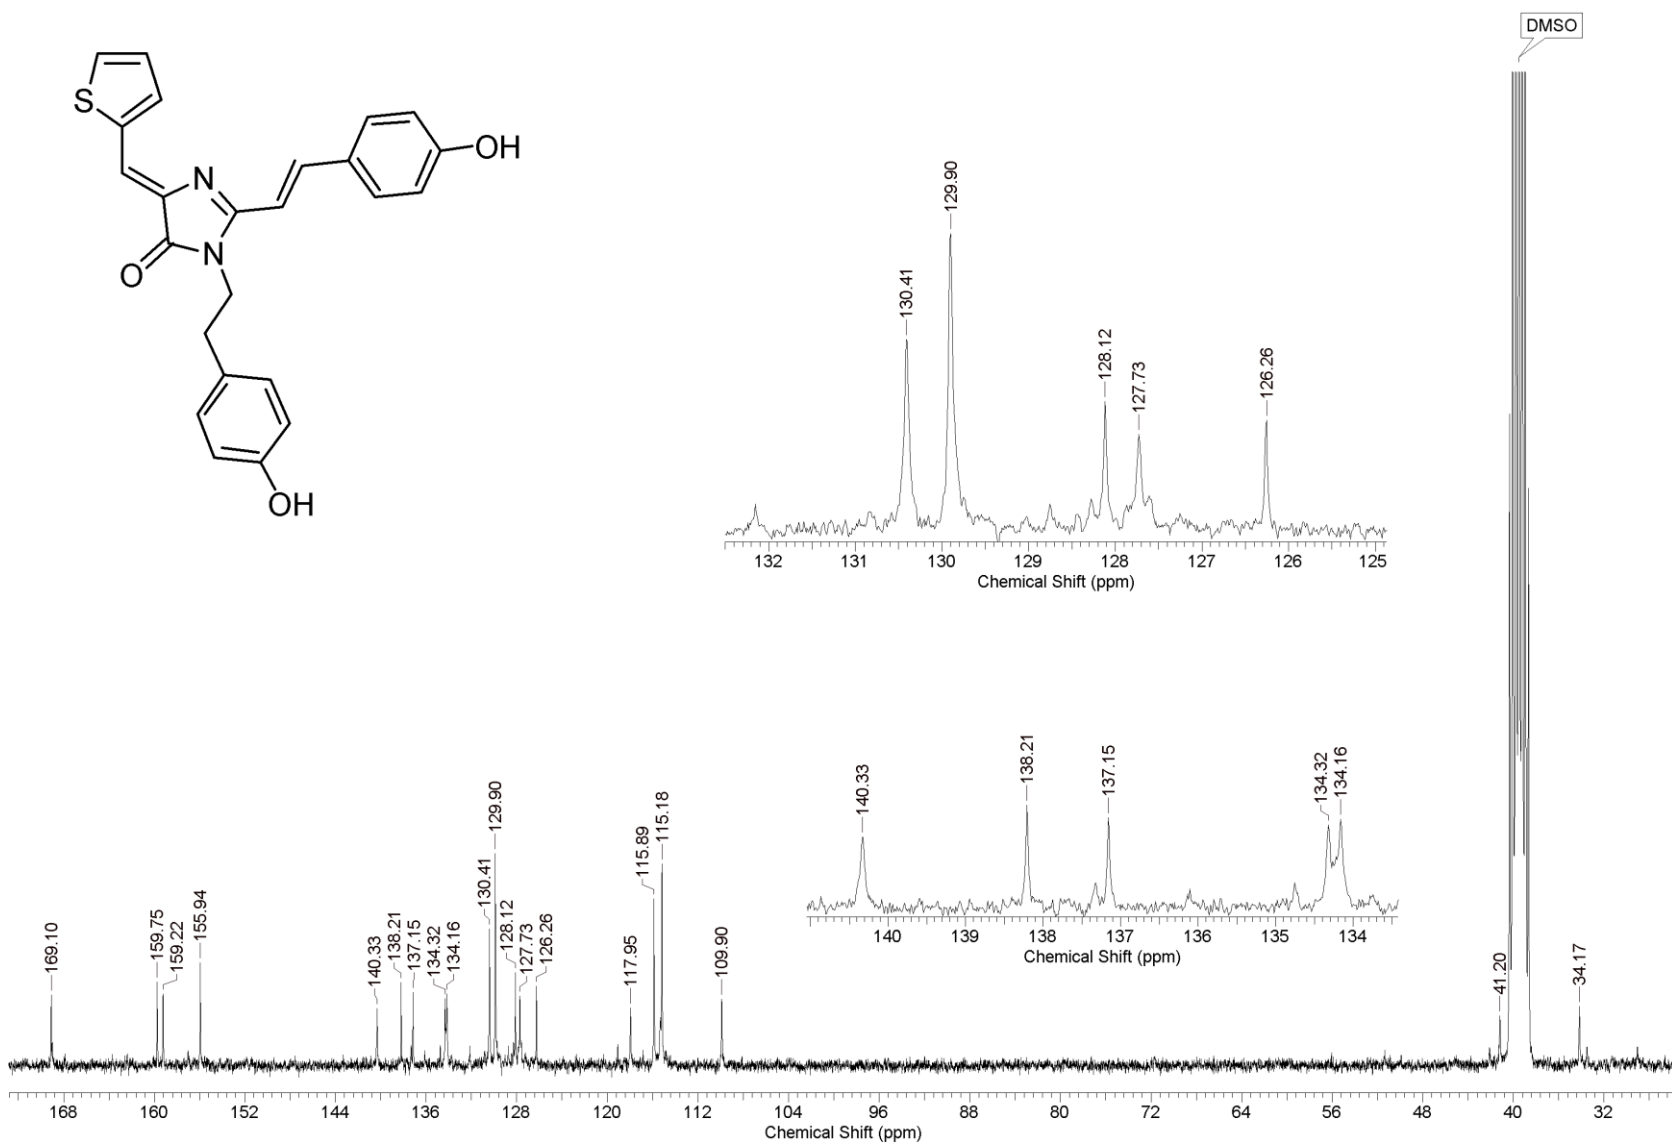

## Supplement S8. NMR titration data for the LTR-III/ZS260.1 complex

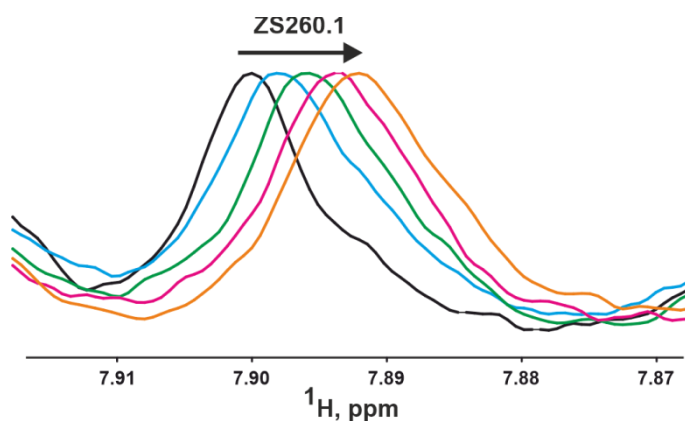

Figure S8-1. Chemical shifts changes in H8 G8 of 50  $\mu\text{M}$  LTR-III upon addition of **ZS260.1** ligand at 20  $^{\circ}\text{C}$ , pH 7.0, 800 MHz.

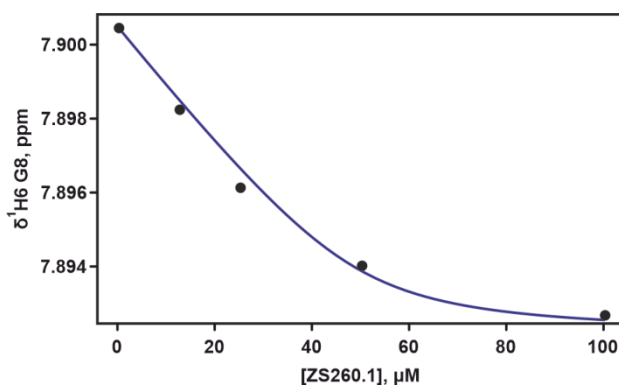

Figure S8-2. The binding curve, describing interaction of LTR-III G4 with **ZS260.1**, approximated by dissociation equation.

## Supplement S9. HIV LTR-III G4 MD simulation parameters

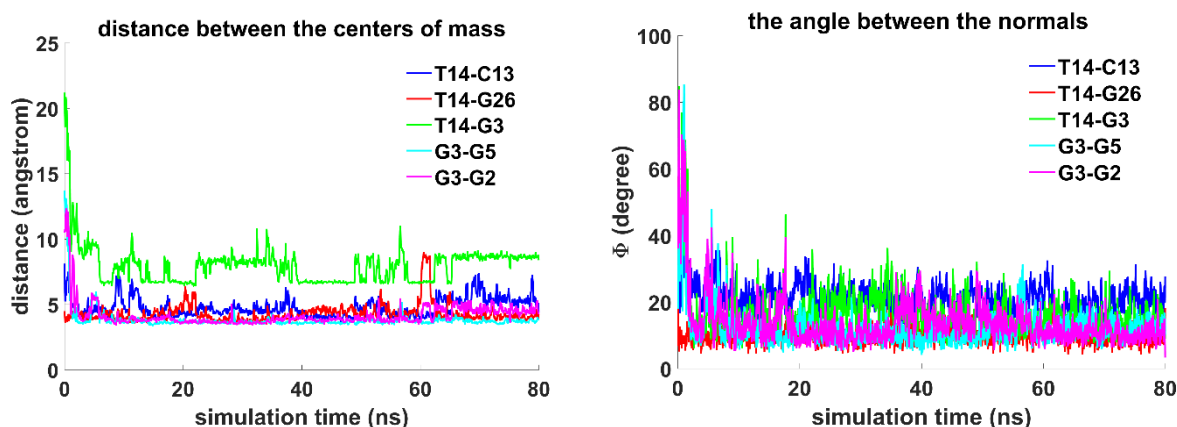

Figure S9-1. Time plots of the center of mass (COM) distances between T14, G3 and surrounding nucleobases (A) and of angles ( $\Phi$ ) between the normals to the nucleobases planes (B). The plots were smoothed using the moving average method (span = 5).

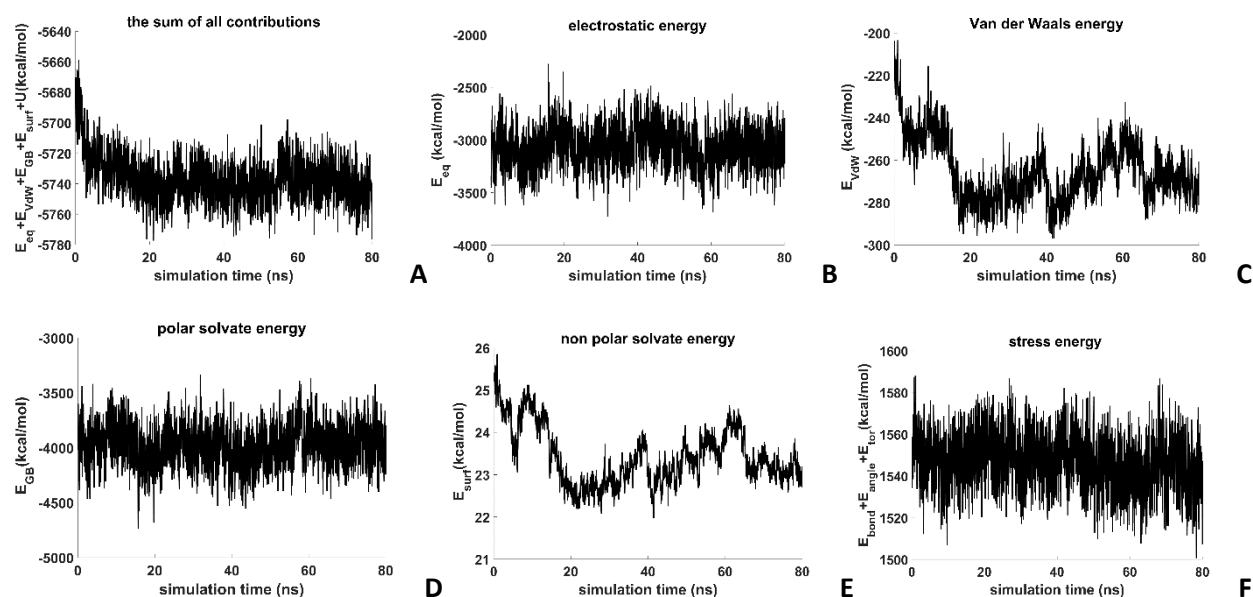

Figure S9-2. Evolution of the contributions to the free energy of the LTR-III structure. The values of parameters on the plots were smoothed using the moving average method (span = 5).  $E_q$  – electrostatic,  $E_{vdw}$  – Van der Waals,  $E_{GB}$  – polar energy of solvation,  $E_{surf}$  – non-polar energy of solvation due to the hydrophobic surface available to the solvent,  $U$  – stress energy.

## Supplement S10. The conformation of the LTR-III/ZS260.1 complex (additional simulation angles)

The conformations of the complexes with **ZS260.1** within the of the LTR-III structure at the initial, 0 ns (left) and final, 80 ns (right) stages of MD simulations. The DNA shown by rendering with the nucleotides are coloured as follows: G – blue, A – red, T – light brown, C - cyan. Cavity-forming nucleotides and ligand are in ball-and-stick representation. Atoms are represented by the following colours: ligand carbon – yellow, DNA carbon – ice blue, oxygen – red, nitrogen – blue, and hydrogen – white.

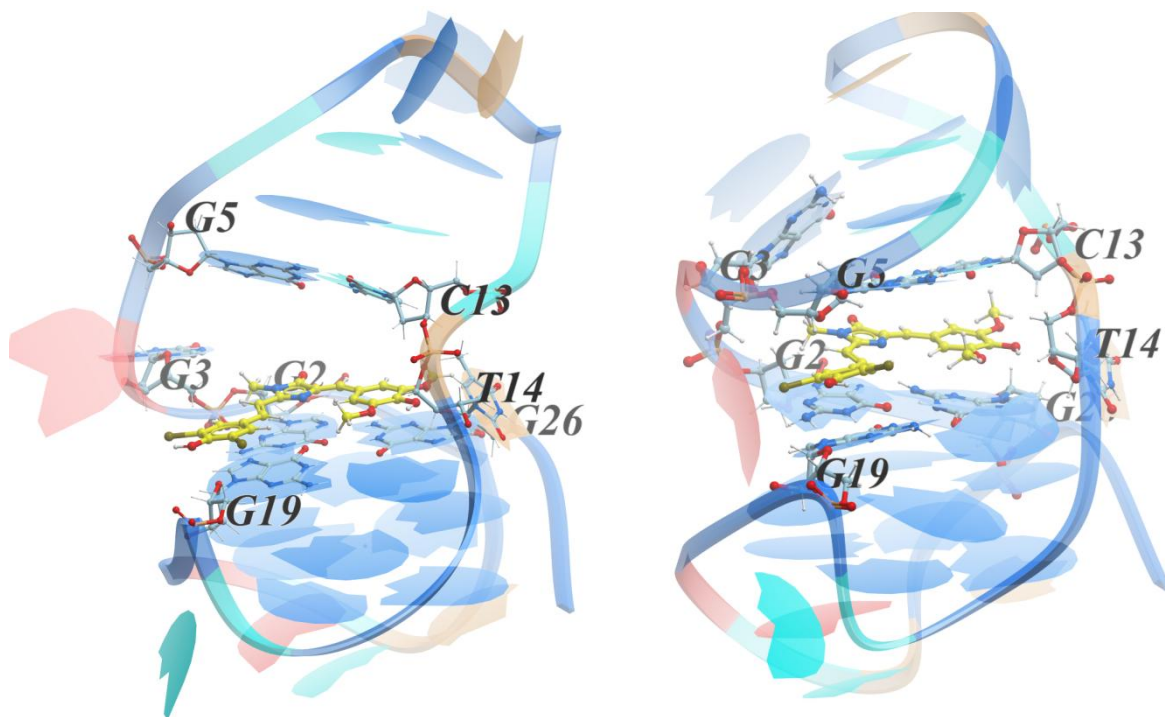

## Supplement S11. HIV LTR-III G4/ZS260.1 complex MD simulation parameters

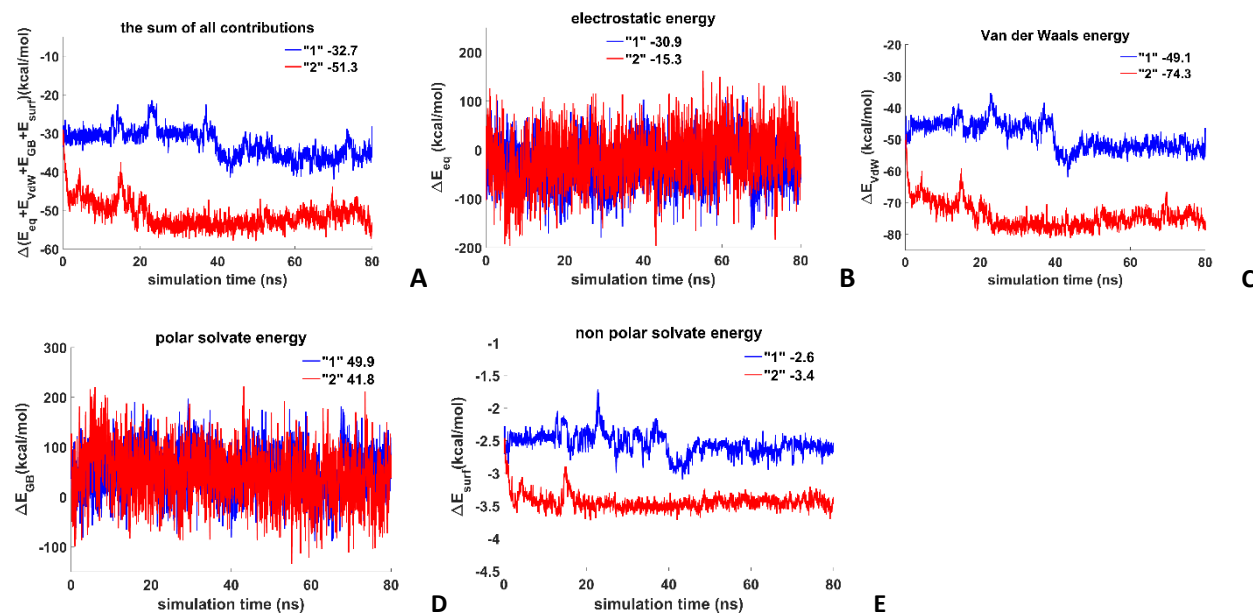

Figure S11-1. Evolution of the contributions to the interaction energy of LTR-III/ZS260.1 complexes. The plots were smoothed using the moving average method (span = 5). In the legends to the graphs, the average values are indicated.  $E_q$  – electrostatic,  $E_{vdw}$  - Van der Waals,  $E_{GB}$  - polar energy of solvation,  $E_{surf}$  - non-polar energy of solvation due to the hydrophobic surface available to the solvent.

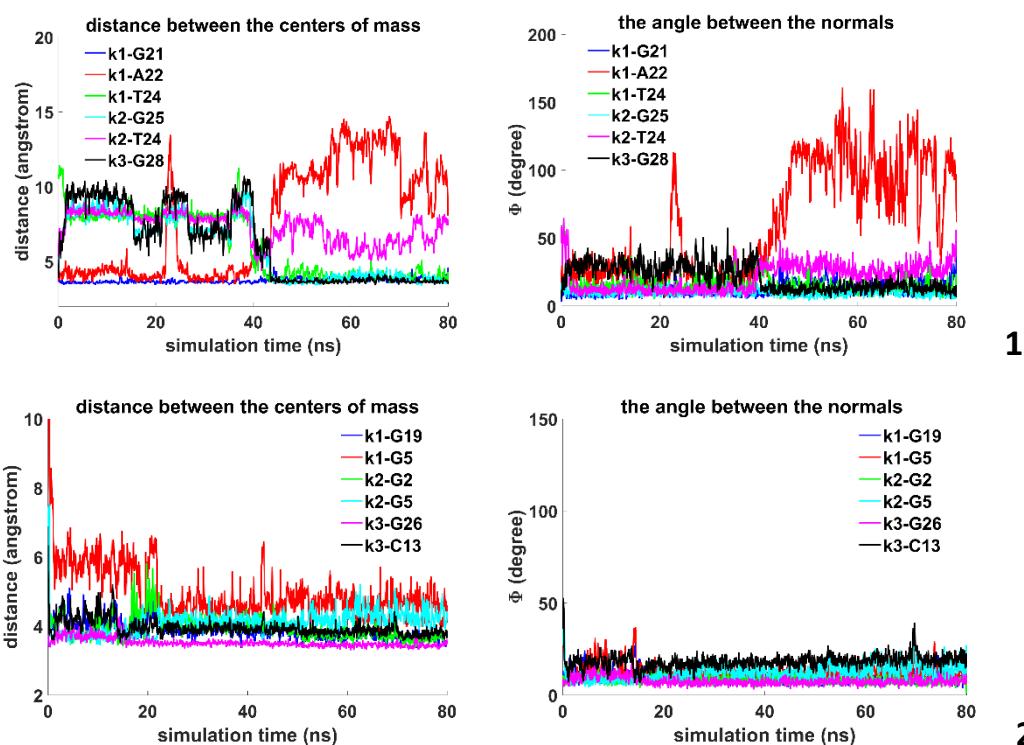

Figure S11-2. Time plots of the center of mass (COM) distances and angles ( $\Phi$ ) between the normals, characterizing the interposition of the ligand and adjacent nucleobases. K1 – COM of dibromophenyl moiety, K2 – COM of imidazolone moiety, K3 – COM of dimethoxyphenyl moiety.



**Table S12. Antiviral activity of the tested compounds in MT4 cells against HIV-1 (st. NL4-3).**

| cmpd    | EC <sub>50</sub> , μM | CC <sub>50</sub> (MT4), μM | LTR-III (average), °C |
|---------|-----------------------|----------------------------|-----------------------|
| N1193   | n/a*                  | 2.3±1.1                    | 14                    |
| N1196   | n/a                   | >25                        | 11,7                  |
| N1197   | n/a                   | 1.66±0.79                  | 11,3                  |
| ZS260   | 3.78±0.91             | 4.1±0.6                    | 8,35                  |
| N1068.2 | 1.78±0.38             | 3.0±1.0                    | 6,9                   |
| N1198   | 1.78±0.38             | 2.8±1.1                    | 6,5                   |
| N960a   | n/a                   | >25                        | 5,2                   |
| N1052   | n/a                   | 6.6±3.1                    | 4,5                   |
| N1199   | 3.3±1.1               | 4.6±2.5                    | 4,3                   |
| N1195   | 3.78±0.91             | 5.9±2.6                    | 4,2                   |
| ZS331   | n/a                   | 1.17±0.55                  | 3,7                   |
| N848.3  | n/a                   | 5.5±2.2                    | 3,3                   |
| N848.2  | n/a                   | 6.4±1.8                    | 3,2                   |
| N683.1  | n/a                   | >25                        | 3,1                   |
| ccE4    | n/a                   | >25                        | 2,8                   |
| N1069   | 4.23±1.75             | 6.0±2.0                    | 2,7                   |
| M903.2  | n/a                   | >25                        | 2,3                   |
| N1122   | n/a                   | >25                        | 2,3                   |
| N1049   | 2.1±1.4               | 5.2±2.5                    | 1,8                   |
| M813    | n/a                   | 0.46±0.16                  | 1,65                  |
| AR559   | n/a                   | >25                        | 1,2                   |
| N906    | n/a                   | 6.6±3.1                    | 0,1                   |
| SA120   | n/a                   | >25                        | -1,35                 |
| N840    | n/a                   | >25                        | -1,55                 |
| MID161  | 7.7±2.2               | 17.3±5.7                   | -1,7                  |
| M802    | n/a                   | 6.6±3.1                    | -2,3                  |
| M2227   | n/a                   | >25                        | -2,7                  |
| AZT     | 0.0071±0.00043        | 8.0±1.5                    | -                     |

\* – not active at non-toxic concentrations
